# Supplementary material for: Differences in reporting serious adverse events in industry sponsored clinical trial registries and journal articles on antidepressant and antipsychotic drugs: a cross-sectional study
Source: PubMed Central journal article supplement — BMJ Open. 2014 Jul 9;4(7):e005535. doi: 10.1136/bmjopen-2014-005535 (PMC4091397; doi:10.1136/bmjopen-2014-005535), 2014-07-09
Supplement: bmjopen-2014-005535.draft_revisions.pdf [file bmjopen-2014-005535.draft_revisions.pdf]

# BMJ Open

## Differences in Reporting Serious Adverse Events in Industry Sponsored Clinical Trial Registries and Journal Articles on Antidepressant and Antipsychotic Drugs – A Cross-sectional Study

|                                 |                                                                                                                                                                                                 |
|---------------------------------|-------------------------------------------------------------------------------------------------------------------------------------------------------------------------------------------------|
| Journal:                        | <i>BMJ Open</i>                                                                                                                                                                                 |
| Manuscript ID:                  | bmjopen-2014-005535                                                                                                                                                                             |
| Article Type:                   | Research                                                                                                                                                                                        |
| Date Submitted by the Author:   | 22-Apr-2014                                                                                                                                                                                     |
| Complete List of Authors:       | Hughes, Shannon; Colorado State University, School of Social Work<br>Cohen, David; University of California, Los Angeles, Luskin School of Public Affairs<br>Jaggi, Rachel; University of Utah, |
| <b>Primary Subject Heading</b>: | Medical publishing and peer review                                                                                                                                                              |
| Secondary Subject Heading:      | Evidence based practice, Mental health, Pharmacology and therapeutics                                                                                                                           |
| Keywords:                       | CLINICAL PHARMACOLOGY, Adverse events < THERAPEUTICS, Clinical trials < THERAPEUTICS                                                                                                            |
|                                 |                                                                                                                                                                                                 |

SCHOLARONE™  
Manuscripts

Differences in Reporting Serious Adverse Events in Industry Sponsored Clinical Trial Registries and Journal Articles on Antidepressant and Antipsychotic Drugs - A Cross-sectional Study

Shannon Hughes, Ph.D.

Assistant Professor

School of Social Work

Colorado State University

Fort Collins, Colorado, USA 80523

David Cohen, Ph.D.

Professor and Marjorie Crump Chair in Social Welfare

Luskin School of Public Affairs

University of California, Los Angeles

Los Angeles, California, USA 90095

Rachel Jaggi, B.A.

Research Analyst

University of Utah

Salt Lake City, Utah, USA 84112

**Corresponding Author:**

Shannon Hughes, Colorado State University, School of Social Work, 1586 Campus Delivery, Fort Collins, CO, USA 80523

Phone: (970) 491-5654

Fax: (970) 491-7280

Email: [Shannon.hughes@colostate.edu](mailto:Shannon.hughes@colostate.edu)

The Corresponding Author has the right to grant on behalf of all authors and does grant on behalf of all authors, an exclusive licence (or non exclusive for government employees) on a worldwide basis to the BMJ Publishing Group Ltd to permit this article (if accepted) to be published in BMJ editions and any other BMJ PGL products and sublicences such use and exploit all subsidiary rights, as set out in our licence.

## ABSTRACT

**Objective:** To examine the degree of concordance in reporting serious adverse events (SAEs) from psychotropic drug trials among journal articles and clinical trial summaries, and to categorize types of discrepancies.

**Design:** Cross-sectional study of summaries of all antidepressant and antipsychotic trials included in an online trial registry and their first associated stand-alone journal articles.

**Setting:** Clinicalstudyresults.org, sponsored by Pharmaceutical Research and Manufacturers of America; clinicaltrials.gov, administered by the US National Institutes of Health.

**Main outcome measure:** Three coders extracted data on the numbers and types of SAEs.

**Results:** 244 trial summaries for six antidepressant and antipsychotic drugs were retrieved, 142 (58.2%) listing an associated article. Of 1,608 SAEs in drug-treated participants according to trial summaries, 694 (43.2%) did not appear in associated articles. Nearly 60% of SAEs counted in articles and 41% in trial summaries had no description. Most cases of death (62.3%) and suicide (53.3%) were not reported in articles. Half or more of the 142 pairs were discordant in reporting the number (49.3%) or description (67.6%) of SAEs. These discrepancies resulted from journal articles' 1) omission of complete SAE data, 2) reporting acute phase study results only, and 3) more restrictive reporting criteria. Trial summaries with zero SAE were 2.35 (95% confidence interval, 1.58 to 3.49;  $P < 0.001$ ) times more likely to be published with no discrepancy in their associated journal article. Since clinicalstudyresults.org was removed from the Internet in 2011, only 7.8% of retrieved trial summaries appear with results on clinicaltrials.gov.

**Conclusions:** Substantial discrepancies exist in SAE data found in journal articles and registered summaries of antidepressant and antipsychotic drug trials. The two main scientific sources accessible to clinicians and researchers are limited by incomplete, ambiguous, and inconsistent reporting. Access to complete and accurate data from clinical trials of drugs currently in use remains a pressing concern.

## ARTICLE SUMMARY

**Strengths and limitations of this study**

- Published journal articles from antidepressant and antipsychotic drug trials report substantially fewer serious adverse events than associated clinical trial summaries posted by industry trial sponsors on a previously active online registry.
- Our findings of inconsistencies and ambiguities in serious adverse event reporting in both journal articles and trial summaries suggest that information in registries might not provide meaningfully improved access to complete and transparent clinical trial data.
- The registry from which we retrieved trial summaries has since been removed from the Internet and most trial summaries were not transferred with results to clinicaltrials.gov, making our analysis a unique examination of data that has been lost or scattered.
- We examined only the first stand-alone journal article associated with each trial summary, so it is possible that additional harms outcomes and longer-term outcomes absent from our sample of journal articles were reported in subsequent articles. Nevertheless, clear trends of incomplete reporting were apparent between journal article and trial summary sources.

## INTRODUCTION

Publication bias and concerns regarding the integrity of the medical treatment knowledge base have led to various mechanisms, such as publicly accessible clinical trial registries, to promote transparent and complete reporting of clinical trial results [1, 2]. As the next most accessible source of drug information after published articles, clinical trial summaries available in online trial registries might contribute to improved evidence synthesis since they are supposed to provide an inclusive synopsis of both positive and negative results [3, 4]. In this study we compare serious adverse events (SAEs) found in industry-funded antipsychotic and antidepressant drug trial summaries posted by trial sponsors on an online trial registry, with SAEs found in published journal articles reporting on the same trials.

SAEs by definition result in death, hospitalization or significant disability and are therefore particularly important to report from a clinical trial because of their potential impacts on treatment decision-making and patient safety. International Conference on Harmonization (ICH) guidelines state that SAEs “deserve special attention” relative to other types of adverse effects, including providing individual-level patient detail and narrative for each SAE in clinical trial reports submitted to regulatory agencies [5]. Regulatory agencies in the United States and across Europe require trial sponsors to immediately report unexpected or life-threatening SAEs [6, 7]. However, the extent to which SAEs are then reported in outlets for clinicians, researchers, and the public is unknown, though evidence suggests incomplete and ambiguous reporting of harms-related data [8-10]. Recent settlements resulting from state and federal lawsuits in the United States against pharmaceutical manufacturers for minimizing or concealing drug harms, further highlight the need for increased diligence in discerning what important harm-related drug

1  
2  
3 information might remain unknown or distorted in scientific outlets for reporting clinical trial  
4  
5 results [11-13].  
6  
7

8 Antipsychotic and antidepressant drugs — which rank among the 10 highest-selling drug  
9  
10 classes in the U.S. and the world [14, 15] — are mainstay treatments in psychiatry and  
11  
12 prescribed for myriad indicated and off-label, psychiatric and non-psychiatric uses [16, 17].  
13

14  
15 Journal publications and clinical trial summaries posted on trial registries currently represent the  
16  
17 primary information sources for clinicians and decision-makers regarding the safety and  
18  
19 effectiveness of drug treatments. In contrast to substantially lengthier accounts of trials found in  
20  
21 clinical study reports submitted to regulatory agencies, clinical trial summaries are abbreviated,  
22  
23 concise descriptions of trials' background, methodology, and positive and negative results and,  
24  
25 similar to clinical study reports, prepared according to templates described in the ICH *Guidelines*  
26  
27 *for Industry: Structure and Content of Clinical Study Reports* [5]. Using the clinical trial  
28  
29 summaries for all trials of these drugs posted by industry sponsors on [clinicalstudyresults.org](http://clinicalstudyresults.org), we  
30  
31 aimed to 1) count and describe SAEs reported in trial summaries and, as applicable, their  
32  
33 associated peer-reviewed journal articles, 2) assess the consistency of SAE reporting between  
34  
35 pairs of trial summaries and associated journal articles, and 3) categorize possible explanations  
36  
37 for discrepant reporting.  
38  
39  
40  
41  
42

## 43 METHODS

### 44 Data Sources

45  
46  
47  
48 Clinical trials summaries were retrieved from [clinicalstudyresults.org](http://clinicalstudyresults.org), the former online  
49  
50 public registry sponsored by the Pharmaceutical Research and Manufacturers of America  
51  
52 (PhRMA). Published journal articles were identified using the bibliography listed on the cover  
53  
54 page of each trial summary.  
55  
56  
57  
58  
59  
60

### 2.1.1 Clinical trial summaries

The clinicalstudyresults.org registry was established in 2005 by PhRMA as a single repository for pharmaceutical manufacturers to post result summaries of their sponsored clinical trials. At the time, the federally funded clinicaltrials.gov, established in 2000 and administered by the U.S. National Institutes of Health, required manufacturers to register only the existence of their trials. According to PhRMA guidelines, complete results of all hypothesis-testing clinical trials completed after 2002 for products approved for marketing in the United States were to be submitted to its registry within one year after completion of the trial, and references to articles published in peer-reviewed journals added to the trial summary as soon as they were published [18].

In May 2011, we retrieved all Phase II, III, and IV clinical trial summaries (n=329) for all nine drugs within the antidepressant and antipsychotic classes listed on clinicalstudyresults.org. We excluded three drugs (desvenlafaxine, quetiapine, and venlafaxine) with registered trials but no or few posted trial summaries. For the remaining six drugs (n=254 trial summaries) we retained the summaries with trial completion dates on or before 2008, allowing at least 2.5 years for a trial to reach publication in the peer-reviewed literature (see Appendix Table 1). This resulted in 244 (74%) clinical trial summaries for six drugs from three manufacturers: aripiprazole (Abilify, Bristol-Myers Squibb), atomoxetine (Strattera, Eli Lilly), duloxetine (Cymbalta, Eli Lilly), olanzapine (Zyprexa, Eli Lilly), sertraline (Zoloft, Pfizer), and ziprasidone (Geodon, Pfizer). Trial summaries averaged 18 pages in length (range: 3 to 147). Supplementary File 1 provides a trial summary illustrating the typical format of the documents in this sample. Trial summaries include both pre-marketing studies that were sent to regulatory

1  
2  
3 agencies for drug approval and post-marketing studies for new indications, additional outcomes,  
4  
5 and long-term follow-up.  
6

### 7 8 *Journal articles* 9

10 Using the bibliography listed on the cover page of each trial summary, we counted a total  
11  
12 of 496 listed publications (an average of two publications per trial, with an average time to  
13  
14 publication of 2.5 years), from which we retrieved the earliest journal article reporting on the full  
15  
16 trial. From the total we excluded 261 (52.6%) sub-set analyses (i.e., reports on a sub-set of the  
17  
18 total sample based on a shared characteristic, such as gender), meta-analyses, and conference  
19  
20 abstracts. Of the 244 trial summaries, 142 (58.2%) listed an associated stand-alone journal  
21  
22 article. We emailed and telephoned the medical communications, clinical trials, or customer  
23  
24 relations department of each manufacturer of the included drugs to inquire about the  
25  
26 completeness of the list of trial summaries and journal articles posted on [clinicalstudyresults.org](http://clinicalstudyresults.org).  
27  
28 No representative from any manufacturer could confirm completeness of the posted lists nor  
29  
30 provide a current list of all clinical trials and journal publications for the respective drugs.  
31  
32 Representatives directed us to visit [clinicaltrials.gov](http://clinicaltrials.gov) to view current and completed trials, and  
33  
34 PubMed for a list of publications. We then attempted to manually search PubMed to match  
35  
36 possible additional publications with the trial summaries, but the absence of trial identification  
37  
38 numbers in journal articles made it extremely difficult to crosscheck and match all sources  
39  
40 reliably. These additional efforts, therefore, did not affect the final sample size, which consisted  
41  
42 of 142 trial summary-journal article pairs listed on [clinicalstudyresults.org](http://clinicalstudyresults.org) and an additional 102  
43  
44 trial summaries from the registry with no associated journal article (see Figure 1).  
45  
46  
47  
48  
49  
50

51 Data Extraction  
52  
53  
54  
55  
56  
57  
58  
59  
60



1  
2  
3 We employed double data extraction. One coder extracted the number and exact  
4 description of SAEs reported to occur in drug-treated participants from the *Results* section of  
5 each of the 244 trial summaries and 142 journal articles. For multi-phase trials, we tallied the  
6 SAEs occurring in each phase. The number of patients experiencing SAEs was counted in the  
7 few cases where the number of events was not provided, therefore underestimating the actual  
8 number of SAEs. We also extracted from each source the trial start and completion year, article  
9 publication date, study length, sample size, targeted indication, and consistency of reporting  
10 SAEs (see explanation below). A second coder independently extracted these data from a 50%  
11 random sample of trial summaries and articles for three of the six drugs. A third coder repeated  
12 the same process for the other three drugs. The values obtained by the second and third coders  
13 were compared to those obtained by the first. Any discrepancies were resolved by consensus.  
14 Coding for most reports and articles was straightforward and few disagreements in recordings  
15 between coders were found.  
16  
17  
18  
19  
20  
21  
22  
23  
24  
25  
26  
27  
28  
29  
30  
31  
32  
33

34 We evaluated the consistency of the number and description of SAEs occurring in drug-  
35 treated participants reported between each trial summary and its associated article (142 pairs).  
36 The *number* of SAEs was considered inconsistent if (1) reported numbers differed between the  
37 two sources (e.g., aripiprazole trial CN138-008: trial summary cited 7, journal article 6, SAEs),  
38 (2) one source reported the number of SAEs while the other contained no or an ambiguous  
39 statement about their occurrence; or (3) the journal article did not report the trial phase in which  
40 SAEs did occur according to the trial summary (e.g., ziprasidone trial 1006: in a 60-week multi-  
41 phase study with 8 SAEs reported in the summary, the article reports findings from the 8-week  
42 acute phase with zero SAEs). The *description* of SAEs was considered inconsistent if only one  
43 source described the events (e.g., duloxetine trial 6091: the summary describes 1 SAE as an  
44  
45  
46  
47  
48  
49  
50  
51  
52  
53  
54  
55  
56  
57  
58  
59  
60

1  
2  
3 intentional overdose, the article omits the description but accurately reports the number), or if  
4  
5 one source less completely described the events than the other source (e.g., duloxetine trial 8601:  
6  
7 the summary lists one death from suicide as well as other SAEs related to psychiatric worsening,  
8  
9 but the article mentions only the suicide). Sources were considered consistent if both reported the  
10  
11 number or description of SAEs identically, or if neither reported such information. In each  
12  
13 instance of discrepant reporting, we carefully reviewed the trial summary and journal article to  
14  
15 clarify the form of the inconsistency and then categorized our findings.  
16  
17  
18

## 19 Analysis

20  
21 We used descriptive statistics to summarize quantitative variables related to study  
22  
23 characteristics and frequencies for categorical variables. We calculated the number of SAEs per  
24  
25 patient treated for each drug by dividing the number of SAEs reported in trial summaries and  
26  
27 journal articles, respectively, by the total number of drug-treated participants.  
28  
29  
30

31  
32 We extracted exact descriptions of SAEs and then categorized them as: behavioral or  
33  
34 cognitive, physical, no description provided, and unspecified (including overdose, dependence,  
35  
36 death or hospitalization for unspecified reasons, and accidental injury). We further counted the  
37  
38 number of SAEs reported as death, suicide, suicide attempt, homicidal ideation, and new or  
39  
40 worsened psychiatric symptoms.  
41  
42

43  
44 We calculated risk ratios to test the likelihood of trial summaries reporting zero SAEs to  
45  
46 be published as stand-alone journal articles in a manner congruent with the summaries, compared  
47  
48 to trial summaries reporting  $\geq 1$  SAEs. Risk ratios were calculated with 95% confidence intervals  
49  
50 and Pearson's chi-square analysis using PASW Statistics, version 18 software [19].  
51

## 52 RESULTS

### 53 Sample Description

1  
2  
3 For each of the six drugs included in this analysis, Table 1 summarizes trial  
4 characteristics as reported in trial summaries, their associated journal articles, and the additional  
5 trial summaries having no associated journal article (referred to as *unpublished trial summary* on  
6 all tables and appendices). Journal articles reported findings for an identical or nearly identical  
7 number of participants as their associated trial summaries. The 102 unpublished summaries,  
8 however, included data on an additional 20,084 drug-treated participants. The median study  
9 length was shorter in journal articles (11 weeks) than in their paired trial summaries (12 weeks)  
10 or unpublished trial summaries (16 weeks).  
11  
12  
13  
14  
15  
16  
17  
18  
19  
20  
21

22 The three antipsychotic drugs (n=129 trial summaries) were being tested for the treatment  
23 of psychotic disorders (56.6% of studies), bipolar disorder or mania (26.4%), or other conditions  
24 (16.2%) such as depressive disorders, Alzheimer's, autism, alcohol dependence, or borderline  
25 personality disorder. The three antidepressant drugs (n=115 trial summaries) were being studied  
26 for the treatment of attention deficit hyperactivity disorder (42.6%), depressive disorders  
27 (34.8%), anxiety disorders (8.7%), or other conditions (14%) such as pain-related disorders or  
28 post-traumatic stress disorder.  
29  
30  
31  
32  
33  
34  
35  
36  
37

### 38 Serious Adverse Events in Trial Summaries

39  
40  
41 Ninety percent of all trial summaries (n=244) reported a precise number of SAEs  
42 occurring in the trial. The 142 trial summaries with an associated journal article reported 1,608  
43 SAEs, and the 102 trial summaries with no associated journal article reported an additional 1,423  
44 SAEs. Table 2 details the total and per patient numbers of SAEs reported in trial summaries for  
45 each drug. Appendix Table 2 lists additional SAEs for the 10 excluded trial summaries with trial  
46 completion dates in 2009 or later.  
47  
48  
49  
50  
51  
52  
53  
54  
55  
56  
57  
58  
59  
60

1  
2  
3 No description was provided for 41% of the SAEs cited in trial summaries (46% and 20%  
4 of SAEs in antipsychotic and antidepressant trials, respectively). An additional 11.6% of SAEs  
5 were non-specifically described, such as “accidental injury” in duloxetine trial 1126. When a  
6 specific description was present, we categorized 28.4% of SAEs as behavioral or cognitive and  
7 18.9% as physical. Table 3 details all cases of death, suicide, and new or worsened psychiatric  
8 symptoms for each drug.  
9

#### 10 11 12 13 14 15 16 17 18 19 20 21 22 23 24 25 26 27 28 29 30 31 32 33 34 35 36 37 38 39 40 41 42 43 44 45 46 47 48 49 50 51 52 53 54 55 56 57 58 59 60

### Serious Adverse Events in Journal Articles

Nearly 40% of journal articles failed to specify the number of SAEs that occurred in the trial (Table 2), containing either no statement related to SAEs or an ambiguous statement without an actual number of SAEs, such as sertraline trial 1060: “no subjects had serious adverse events related to study treatment.” A total of 914 SAEs were reported across the 85 journal articles that did include specific data on SAE occurrence.

Most SAEs (58.9%) reported in journal articles (61% in antipsychotic and 55.5% in antidepressant trials) had no accompanying description and another 8% were non-specifically described. Nearly one-fifth (18.9%) of SAEs were behavioral or cognitive in nature and 14.6% were described as physical. Table 3 shows that one-quarter of SAEs described in journal articles were categorized as death, suicide, homicidal ideation, or new or worsened psychiatric symptoms.

### Consistency of Reporting in Trial Summary-Journal Article Pairs

Just over half (56.8%) of the 1,608 SAEs experienced by drug-treated participants according to trial summaries (n=142) were also reported in associated journal articles. This proportion varied widely between the drugs, from 14.8% of SAEs in atomoxetine trials to 114.6% in aripiprazole trials (see Table 2). The number of SAEs per patient for most drugs were

1  
2  
3 lower in articles (0.03, range: 0.003 - 0.07) than in associated summaries (0.05, range: 0.02 –  
4  
5 0.13). Trial summaries with no associated article averaged the highest number of SAEs per  
6  
7 patient (0.07, range: 0.01 – 0.14).  
8  
9

10 Half or more of the 142 trial summary-journal article pairs were discordant in reporting  
11  
12 the number (49.3%) or description (67.6%) of SAEs (Table 4). In half of these pairs, the reported  
13  
14 number of SAEs differed by more than 20% between the two sources.  
15  
16

17 Both journal articles and associated trial summaries failed to describe a substantial  
18  
19 proportion of SAEs. Most cases of death (62.3%) and suicide (53.3%) cited in trial summaries  
20  
21 were not reported in associated journal articles (Table 3).  
22  
23

24 The 34 trial summaries with zero SAEs were 2.35 (95% confidence interval, 1.58 to 3.49;  
25  
26  $P < 0.001$ ) times as likely to have an associated journal article reporting this data consistently with  
27  
28 the trial summary data as were the 181 summaries with 1 or more SAEs.  
29  
30

### 31 Explanations for Discrepant Reporting 32 33

34 Seventy (49.3%) of the 142 trial summary-journal article pairs were discrepant in SAE  
35  
36 reporting. Nearly half of these instances might be explained by differences between sources in  
37  
38 the study length or phase being reported (25%) or in the reporting criteria used (24.3%). Table 5  
39  
40 provides examples of each of these forms of discrepant reporting. Importantly, while some  
41  
42 journal articles appeared to apply more restrictive reporting criteria that might lead to omitting  
43  
44 certain data, the many articles that did report exact SAE numbers often did so regardless of  
45  
46 presumed causality to the study drug. For example, articles and summaries for olanzapine trials  
47  
48 3131 and 7031 reported all SAEs even though some events were thought to be unrelated to the  
49  
50 study drug. Yet, the article for olanzapine trial 4414 separately details SAEs thought to be related  
51  
52  
53  
54  
55  
56  
57  
58  
59  
60

1  
2  
3 and unrelated to the drug [20]. Thus, no clear or consistent pattern on SAE reporting criteria  
4  
5 emerged from this sample of journal articles.  
6  
7

8 Another one-third (32.9%) of discrepancies appear to be simple failures of journal  
9  
10 articles to report complete SAE data (see Table 5). In a minority (13%) of cases, however, the  
11  
12 journal article provided more precise data or a higher number of SAEs than the trial summary.  
13  
14 The article for aripiprazole trial CN138-050, for example, cites 6 SAEs in drug-treated  
15  
16 participants [21], while the summary states only that the incidence of SAEs was low.  
17  
18

#### 19 Post Hoc Analysis of Clinical Trial Summary Availability

20  
21 In December 2011, clinicalstudyresults.org was removed from the Internet for unknown  
22  
23 reasons. The Internet archive for the website (found here: [Internet archive](#)) suggests that the  
24  
25 expansion of other registries made clinicalstudyresults.org seem redundant from industry's  
26  
27 perspective [22]. One year after this removal of the registry, we cross-checked our data source by  
28  
29 searching for each of the 244 trial summaries on clinicaltrials.gov. (In that database, the U.S.  
30  
31 Food and Drug Administration Amendment Act [FDAAA] of 2007 newly mandated trial  
32  
33 sponsors to include summary reporting of results for trials that were initiated after or ongoing as  
34  
35 of late 2007.) Our search revealed that 139 (57%, range across drugs: 25% - 80%) of the 244  
36  
37 trials were registered on clinicaltrials.gov, but only 15 of these (10.8%, range across drugs: 0% -  
38  
39 39%) had posted study results. In October 2013, nearly two years after the  
40  
41 clinicalstudyresults.org takedown, these numbers had only slightly budged, with 19 registered  
42  
43 trials now reporting study results. While nearly all (99%) of the trial summaries not currently  
44  
45 registered on clinicaltrials.gov have trial start or completion dates prior to 2007, 75% of trial  
46  
47 summaries that *are* registered on the website also have pre-2007 trial dates. In the interest of  
48  
49 openness and transparency, we created a publicly accessible website ([www.rxarchives.com](http://www.rxarchives.com))  
50  
51  
52  
53  
54  
55  
56  
57  
58  
59  
60

1  
2  
3 where all 244 trial summaries are posted in pdf format and freely available for download. [Note  
4  
5  
6 to reviewers: the website, rxarchives.com, will become live at the time of this manuscript's  
7  
8 publication]

## 10 DISCUSSION

11  
12 This study demonstrates that a substantially lower number of SAEs appear in published  
13  
14 journal articles than registered trial summaries of antidepressant and antipsychotic drug trials,  
15  
16 and shows further that both sources for drug information are often inconsistent or ambiguous in  
17  
18 SAE reporting. In this study, 43.2% of all SAEs appearing in 142 trial summaries posted on an  
19  
20 online registry across six psychotropic drugs were not reported in the first associated stand-alone  
21  
22 journal articles listed by the drug's manufacturer. Failure to describe the nature of SAEs was also  
23  
24 common in both sources. Given that many consumers of psychotropic drugs take these  
25  
26 medications for months or years, that approximately one-quarter of journal articles reported only  
27  
28 acute phase results of longer-term trials and that the median study length in trial summaries with  
29  
30 an associated journal article (12 weeks) was four weeks shorter than in trials without a journal  
31  
32 article highlight an additional attrition of evidence on longer term outcomes.  
33  
34  
35  
36  
37

38  
39 These findings are congruent with other recent analyses demonstrating more complete  
40  
41 outcomes information in registered clinical trial summaries compared to published journal  
42  
43 articles [9], although examination of full clinical study reports reveals that both of the latter  
44  
45 sources suffer from incomplete reporting of key data [10]. Similar to our results, Riveros and  
46  
47 colleagues [9] found that registered trial summaries (99%; present study 90%) more often report  
48  
49 data on serious adverse events compared to published articles (63%; present study 60%).  
50  
51 However, in an analysis comparing publicly available data in registered clinical trial summaries  
52  
53 and journal publications to full clinical study reports submitted to a regulatory agency for drug  
54  
55  
56  
57  
58  
59  
60

1  
2  
3 products, the former sources reported complete information on harms outcomes significantly less  
4 (~25%) than clinical study reports (87% of harms outcomes reported completely) [10]. SAEs,  
5  
6 specifically, were reported completely only 51% of the time in journal articles and trial  
7  
8 summaries, and 30% of SAE outcomes were not reported at all in these sources. In their analysis  
9  
10 of full clinical study reports on the influenza drug Tamiflu, Doshi, Jefferson, and Del Mar [3] are  
11  
12 alarmed by the important data remaining unknown to most physicians when clinical trial  
13  
14 information is limited to the published journal literature. The occurrence of SAEs and the  
15  
16 rationales for classifying events as adverse are among many possible discoveries in clinical study  
17  
18 reports that can markedly alter a drug's benefit-to-risk profile. While publication bias of this sort  
19  
20 in the literature has long been acknowledged or suspected [23-25], the present study clarifies the  
21  
22 degree to which such bias distorts the perception of important harms outcomes (i.e., number and  
23  
24 nature of SAEs) across two classes of popularly used psychotropic drugs. Also, this study adds to  
25  
26 the evidence base questioning whether information posted in online clinical trial registries  
27  
28 represents meaningful improvement.  
29  
30  
31  
32  
33  
34  
35

36 For another 102 trials with no associated stand-alone journal article in the present study,  
37  
38 the clinical trial summaries report an additional 1,423 SAEs and represent the only publicly  
39  
40 available data source on these trials. In a recent examination of 585 large randomized trials  
41  
42 registered on clinicaltrials.gov, 29% had no associated journal publication and most (78%) of  
43  
44 those also had no results available on the clinicaltrials.gov registry [26]. Riveros and colleagues  
45  
46 [9] found that 50% of 594 randomly sampled controlled drug trials on clinicaltrials.gov had no  
47  
48 corresponding published article. These findings highlight the necessity for clinicians,  
49  
50 researchers, and decision-makers to consult multiple sources in order to achieve a comprehensive  
51  
52 and more complete appraisal of drugs' safety profile, although again, clinical trial summaries are  
53  
54  
55  
56  
57  
58  
59  
60



1  
2  
3 themselves limited by incomplete reporting [10, 27] and by regulatory policies that require  
4  
5 registration of only recent [1] or new trials [28].  
6  
7

8 Our post hoc analysis further revealed that, while 57% (139/244) of the present sample  
9  
10 of trial summaries are registered on clinicaltrials.gov, only 7.8% (19/244) are available on the  
11  
12 registry with results. Three-quarters of these currently registered trials have trial start or  
13  
14 completion dates prior to 2007, thereby suggesting that actual registration practices on  
15  
16 clinicaltrials.gov may be more inclusive than the minimum requirements set out by the FDAAA.  
17  
18 Access to the full evidence base of drugs currently in use, including recent studies and those  
19  
20 conducted prior to widespread deployment of registries, is essential for sound treatment decision-  
21  
22 making and the assurance of present day patient safety [10, 29], but the important efficacy and  
23  
24 harms information contained in these 225 trials on six psychotropic drugs has been lost or  
25  
26 scattered. As of this writing, Pfizer (sertraline and ziprasidone) and Bristol-Myers Squibb  
27  
28 (aripiprazole) company websites include trial summaries or links to clinicaltrials.gov only for  
29  
30 trials completed or ongoing as of 2007, in accordance with FDAAA guidelines. All clinical trial  
31  
32 summaries included in the present analysis for atomoxetine, duloxetine, and olanzapine are  
33  
34 available on Eli Lilly's company website. Some data, then, have been lost to the evidence base  
35  
36 with the removal of clinicalstudyresults.org, while other data are still available but no longer  
37  
38 accessible through a single repository. The important harms data contained in the present body of  
39  
40 trial summaries provides further support for the recommendation that all ongoing, recent, and  
41  
42 archive drug trials for all new and existing drugs be made available to clinicians and consumers  
43  
44 in a clear and accessible format, including links between all trial-related documents (journal  
45  
46 articles, registry records, trial protocol, and so on) for transparent navigation of each trial  
47  
48 component to the core study [10, 30, 31].  
49  
50  
51  
52  
53  
54  
55  
56  
57  
58  
59  
60

1  
2  
3 The present study has important limitations and strengths. First, although participating  
4 industry trial sponsors had posted on their respective websites statements of their commitment to  
5 posting all trial results in a timely manner on [clinicalstudyresults.org](http://clinicalstudyresults.org), the completeness and  
6 accuracy of trial summaries on [clinicalstudyresults.org](http://clinicalstudyresults.org) could not be verified. However, since our  
7 crosscheck of summaries on [clinicaltrials.gov](http://clinicaltrials.gov) revealed that few of these trials were transferred  
8 with results, our present analysis provides a glimpse on unique trial evidence that a  
9 contemporary standard database fails to capture. Second, only the first stand-alone journal article  
10 for each trial was included in this analysis. For trials with multiple publications, additional  
11 information on SAEs might appear in subsequent articles. However, this possibility might be  
12 slight as the median number of journal articles per trial summary was one, and over half of total  
13 articles listed for the six drugs were pooled or sub-set analyses or conference abstracts. We do  
14 not know whether the trends observed in the 142 trial summary-journal article pairs would hold  
15 for the other 102 trials. Finally, the results of this study cannot be generalized to other drugs and  
16 drug classes, but do add to the substantial body of empirical findings demonstrating poor adverse  
17 event assessment and reporting practices and a distortion of evidence through selective reporting  
18 of industry-sponsored psychotropic drug research [24, 32-35].  
19  
20  
21  
22  
23  
24  
25  
26  
27  
28  
29  
30  
31  
32  
33  
34  
35  
36  
37  
38  
39  
40

41 The integrity of the medical treatment knowledge base preserves sound clinical practice  
42 and ensures patient safety. If nearly half of serious adverse events in psychotropic drug research  
43 are not reported in journal articles and many more can be found in sources not easily accessed by  
44 relevant treatment decision-makers [3, 10, 36], then, without integrating multiple data sources,  
45 benefit-to-harm assessments made by groups constructing clinical guidelines and by individual  
46 clinicians making prescription decisions are based on incomplete evidence and likely biased  
47 toward underestimating risks. Multiple solutions to the grave problem of incomplete reporting of  
48  
49  
50  
51  
52  
53  
54  
55  
56  
57  
58  
59  
60

1  
2  
3 clinical trials have been proposed, and some recent strides have been made. Some suggest  
4  
5 shifting toward public funding and control of drug research in order to produce credible  
6  
7 information accessible and transparent to all stakeholders [37-40]. Some propose to treat failures  
8  
9 to disclose complete knowledge of adverse effects from clinical trials as criminal offenses  
10  
11 requiring criminal prosecution of responsible individuals and companies [41]. At the same time,  
12  
13 ongoing campaigns have gained momentum across the United Kingdom in calling for  
14  
15 pharmaceutical manufacturers to share clinical study reports on all drugs in use [31] and in the  
16  
17 United States for sharing clinical trial datasets with independent scientists [42]. Many agree,  
18  
19 however, that regulatory requirements for registering new and ongoing studies does not  
20  
21 adequately protect the millions of patients currently taking prescription drugs [10, 31], and the  
22  
23 pharmaceutical industry has been slow and resistant to accepting the level of openness that  
24  
25 scientists and the public have been calling for [31, 43].  
26  
27  
28  
29  
30  
31

32 The present findings highlight inconsistencies in harms-related reporting between  
33  
34 published articles and trial registry summaries of psychotropic drugs, and indicate that clinical  
35  
36 decisions regarding drug use may be based on substantially truncated evidence. Policy  
37  
38 discussions in this area should consider to what extent patients who use drugs, clinicians who  
39  
40 prescribe drugs and the public who finance most of their use deserve access to complete and  
41  
42 accurate scientific data from drug trials.  
43  
44  
45  
46  
47  
48  
49  
50  
51  
52  
53  
54  
55  
56  
57  
58  
59  
60

**Competing Interests:** All authors have completed the ICMJE uniform disclosure form at [www.icmje.org/coi\\_disclosure.pdf](http://www.icmje.org/coi_disclosure.pdf) and declare: no support from any organisation for the submitted work; no financial relationships with any organisations that might have an interest in the submitted work in the previous three years; no other relationships or activities that could appear to have influenced the submitted work.

**Funding:** This research received no specific grant from any funding agency in the public commercial or not-for-profit sectors.

**Contributors:** SH and DC conceived the idea of the study and were responsible for the design of the study. SH and RJ were responsible for the acquisition of the data, for undertaking data coding and analysis, and produced the tables. DC also contributed to data coding, and provided critical input into the analysis and interpretation of results. The initial draft of the manuscript was prepared by SH and then circulated repeatedly among all authors for critical revision.

**Data Sharing:** All clinical trial summaries that were analysed in this study have been uploaded by the first author (S.H.) to a publicly-accessible website ([www.rxarchives.com](http://www.rxarchives.com)) for download.

## REFERENCES

- [1] Dickersin K, Rennie D. The evolution of trial registries and their use to assess the clinical trial enterprise. *JAMA*. 2012;307(17):1861-4.
- [2] Turner E. Publication bias, with a focus on psychiatry: Causes and solutions. *CNS Drugs*. 2013;27(6):457-68.
- [3] Doshi P, Jefferson T, Del Mar C. The imperative to share clinical study reports: Recommendations from the Tamiflu experience. *Plos Med*. 2012;9(4):e1001201.
- [4] Doshi P, Jones M, Jefferson T. Rethinking credible evidence synthesis. *BMJ*. 2012;344:d7898.
- [5] Structure and content of clinical study reports E3. 1995 [cited; Available from: [http://www.ich.org/fileadmin/Public\\_Web\\_Site/ICH\\_Products/Guidelines/Efficacy/E3/E3\\_Guideline.pdf](http://www.ich.org/fileadmin/Public_Web_Site/ICH_Products/Guidelines/Efficacy/E3/E3_Guideline.pdf)]
- [6] Guidance for industry and investigators: Safety reporting requirements for INDs and BA/BE studies. 2012 [cited; Available from: <http://www.fda.gov/downloads/Drugs/GuidanceComplianceRegulatoryInformation/Guidances/UCM227351.pdf>]
- [7] Reporting requirements of individual case safety reports (ICSRs) applicable to marketing authorisation holders during the interim period. 2013 [cited; Available from: [http://www.ema.europa.eu/docs/en\\_GB/document\\_library/Regulatory\\_and\\_procedural\\_guideline/2012/05/WC500127657.pdf](http://www.ema.europa.eu/docs/en_GB/document_library/Regulatory_and_procedural_guideline/2012/05/WC500127657.pdf)]
- [8] Earley A, Lau J, Uhling K. Haphazard reporting of deaths in clinical trials: A review of cases of ClinicalTrials.gov records and matched publications - a cross-sectional study. *BMJ Open*. 2013;3:e001963.

- 1  
2  
3 [9] Riveros C, Dechartes A, Perrodeau E, Haneef R, Boutron I, Revaud P. Timing and  
4 completeness of trial results posted at Clinicaltrials.gov and published in journals. *Plos Med*.  
5 2013;10(12):e1001566.  
6  
7 [10] Wieseler B, Wolfram N, McGauran N, Kerekes MF, Vervolgyi V, Kohlepp P, et al.  
8 Completeness of reporting of patient-relevant clinical trial outcomes: Comparison of unpublished  
9 clinical study reports with publicly available data. *Plos Med*. 2013;10(10):e1001526.  
10 [11] Thomas K. J.&J. fined \$1.2 billion in drug case. *New York Times* 2012 April 12, 2012  
11 [cited; Available from: [http://www.nytimes.com/2012/04/12/business/drug-giant-is-fined-1-2-](http://www.nytimes.com/2012/04/12/business/drug-giant-is-fined-1-2-billion-in-arkansas.html)  
12 [billion-in-arkansas.html](http://www.nytimes.com/2012/04/12/business/drug-giant-is-fined-1-2-billion-in-arkansas.html)  
13  
14 [12] Thomas K, Schmidt M. Glaxo agrees to pay \$3 billion in fraud settlement. *New York*  
15 *Times* 2012 [cited; Available from:  
16 [http://www.nytimes.com/2012/07/03/business/glaxosmithkline-agrees-to-pay-3-billion-in-fraud-](http://www.nytimes.com/2012/07/03/business/glaxosmithkline-agrees-to-pay-3-billion-in-fraud-settlement.html?pagewanted=all)  
17 [settlement.html?pagewanted=all](http://www.nytimes.com/2012/07/03/business/glaxosmithkline-agrees-to-pay-3-billion-in-fraud-settlement.html?pagewanted=all)  
18  
19 [13] Almashat S, Wolfe S. Pharmaceutical industry criminal and civil penalties: An update.  
20 2012 [cited October 21, 2013]; Available from: <http://www.citizen.org/documents/2073.pdf>  
21 [14] Top therapeutic classes by U.S. spending. 2012 [cited 2012 July 18, 2012]; Available  
22 from:  
23 [http://www.imshealth.com/deployedfiles/ims/Global/Content/Corporate/Press%20Room/Top-](http://www.imshealth.com/deployedfiles/ims/Global/Content/Corporate/Press%20Room/Top-Line%20Market%20Data%20&%20Trends/2011%20Top-line%20Market%20Data/Top_Therapy_Classes_by_Sales.pdf)  
24 [Line%20Market%20Data/Top\\_Therapy\\_Classes\\_by\\_Sales.pdf](http://www.imshealth.com/deployedfiles/ims/Global/Content/Corporate/Press%20Room/Top-Line%20Market%20Data/Top_Therapy_Classes_by_Sales.pdf)  
25  
26 [15] Top 20 global therapeutic classes, 2011. 2012 [cited; Available from:  
27 [http://www.imshealth.com/deployedfiles/ims/Global/Content/Corporate/Press%20Room/Top-](http://www.imshealth.com/deployedfiles/ims/Global/Content/Corporate/Press%20Room/Top-Line%20Market%20Data%20&%20Trends/2011%20Top-line%20Market%20Data/Top_20_Global_Therapeutic_Classes.pdf)  
28 [line%20Market%20Data/Top\\_20\\_Global\\_Therapeutic\\_Classes.pdf](http://www.imshealth.com/deployedfiles/ims/Global/Content/Corporate/Press%20Room/Top-Line%20Market%20Data%20&%20Trends/2011%20Top-</a><br/>29 <a href=)  
30  
31 [16] Alexander G, Gallagher S, Mascola A, Moloney R, Stafford R. Increasing off-label use of  
32 antipsychotic medications in the United States, 1995-2008. *Pharmacoepidemiol Drug Saf*.  
33 2011;20(2):177-84.  
34  
35 [17] Mark T. For what diagnoses are psychotropic medications being prescribed?: A  
36 nationally representative survey of physicians. *CNS Drugs*. 2010;24(4):319-26.  
37 [18] PhRMA clinical study results database proposal. 2004 [cited August 30, 2008];  
38 Available from:  
39 [http://www.aei.org/files/2004/09/20/20040927\\_ClinicalStudyResultsDatabase.pdf](http://www.aei.org/files/2004/09/20/20040927_ClinicalStudyResultsDatabase.pdf)  
40  
41 [19] PASW Statistics, 18.0. Chicago: Predictive Analytics Software 2009.  
42 [20] De Deyn PP, Carrasco M, Deberdt W, Jeandel C, Hay D, Feldman P, et al. Olanzapine  
43 versus placebo in the treatment of psychosis with or without associated behavioral disturbances  
44 in patients with Alzheimer's disease. *Int J Geriatr Psychiatry*. 2004;19:115-26.  
45 [21] Tran-Johnson T, Sack D, Marcus R, Auby P, McQuade R, Oren D. Efficacy and safety of  
46 intramuscular aripiprazole in patients with acute agitation: A randomized, double-blind, placebo-  
47 controlled trial. *J Clin Psychiatry*. 2007;68(1):111-9.  
48 [22] Veitch E. Silent takedown of the pharma trials database...and more. 2012 [cited;  
49 Available from: [http://blogs.plos.org/speakingofmedicine/2012/03/23/silent-takedown-of-the-](http://blogs.plos.org/speakingofmedicine/2012/03/23/silent-takedown-of-the-pharma-trials-database%E2%80%A6and-more/)  
50 [pharma-trials-database%E2%80%A6and-more/](http://blogs.plos.org/speakingofmedicine/2012/03/23/silent-takedown-of-the-pharma-trials-database%E2%80%A6and-more/)  
51  
52 [23] Chan A-W, Hrobjartsson A, Haahr MT, Gotzsche PC, Altman DG. Empirical evidence  
53 for selective reporting of outcomes in randomized trials: comparison of protocols to published  
54 articles. *JAMA*. 2004;291(20):2457-65.  
55  
56  
57  
58  
59  
60

- 1  
2  
3 [24] Heres S, Davies J, Maino K, Jetzinger E, Kissling W, Leucht S. Why olanzapine beats  
4 risperidone, risperidone beats quetiapine, and quetiapine beats olanzapine: An exploratory  
5 analysis of head-to-head comparison studies of second-generation antipsychotics. *Amer J Psych*.  
6 2006;163:185-94.  
7  
8 [25] Ioannidis JPA, Lau J. Completeness of safety reporting in randomized trials: An  
9 evaluation of 7 medical areas. *JAMA*. 2001;285:437-43.  
10 [26] Jones C, Handler L, Crowell K, Keil L, Weaver M, Platts-Mills T. Non-publication of  
11 large randomized clinical trials: cross sectional analysis. *BMJ*. 2013;347:f6104.  
12 [27] Wieseler B, Kerekes MF, Vervoelgyi V, McGauran N, Kaiser T. Impact of document  
13 type on reporting quality of clinical drug reports: a comparison of registry reports, clinical study  
14 reports, and journal publications. *Br Med J*. 2012;344:d8141.  
15 [28] Torjesen I. Europe's drug agency will publish clinical trial data for new products from  
16 2014. *BMJ*. 2012;345:e8061.  
17 [29] Doshi P, Dickersin K, Healy D, Vedula SS, Jefferson T. Restoring invisible and  
18 abandoned trials: A call for people to publish findings. *BMJ*. 2013;346:f2865.  
19 [30] Chan A-W, Song F, Vickers A, Jefferson T, Dickersin K, Gotzsche PC, et al. Increasing  
20 value and reducing waste: addressing inaccessible research. *The Lancet*. 2014;383:257-66.  
21 [31] Goldacre B. Are clinical trial data shared sufficiently today? No. *BMJ*. 2013;347(f1880).  
22 [32] Kirsch I, Moore T, Scoboria A, Nicholls S. The emperor's new drugs: An analysis of  
23 antidepressant medication data submitted to the U.S. Food and Drug Administration. *Prevention*  
24 & *Treatment*. 2002;5(23).  
25 [33] Melander H, Ahlqvist-Rastad J, Meijer G, Beermann B. Evidence-b(i)ased medicine --  
26 selective reporting from studies sponsored by pharmaceutical industry: Review of studies in new  
27 drug applications. *Br Med J*. 2003;326:1171-3.  
28 [34] Papanikolaou P, Churchill R, Wahlbeck K, Ioannidis JPA. Safety reporting in  
29 randomized trials of mental health interventions. *Amer J Psych*. 2004;161:1692-7.  
30 [35] Turner E, Matthews AM, Linardatos E, Tell R, Rosenthal R. Selective publication of  
31 antidepressant trials and its influence on apparent efficacy. *The New England Journal of*  
32 *Medicine*. 2008;358:252-60.  
33 [36] Rodgers M, Brown J, Heirs M, Higgins J, Mannion R, Simmonds M, et al. Reporting of  
34 industry funded study outcome data: comparison of confidential and publicized data on the  
35 safety and effectiveness of rhBMP-2 for spinal fusion. *BMJ*. 2013;346:f3981.  
36 [37] Angell M. Industry-sponsored clinical research: a broken system. *JAMA*.  
37 2008;300(9):1069-71.  
38 [38] Relman A, Angell M. America's other drug problem. *The New Republic*.  
39 2002;227(25):27-41.  
40 [39] Baker D. The benefits and savings from publicly funded clinical trials of prescription  
41 drugs. *International Journal of Health Services*. 2008;38(4):731-50.  
42 [40] Ross JS, Gross CP, Krumholz HM. Promoting transparency in pharmaceutical-sponsored  
43 research. *American Journal of Public Health*. 2012;102(1):72-80.  
44 [41] Gotzsche PC. *Deadly medicines and organized crime: How big pharma has corrupted*  
45 *healthcare*. London: Radcliffe Publishing 2013.  
46 [42] Peart K. Yale program's agreement with Johnson & Johnson allows broad access to  
47 clinical trial data. 2014 [cited; Available from: [http://news.yale.edu/2014/01/30/yale-program-s-](http://news.yale.edu/2014/01/30/yale-program-s-agreement-johnson-johnson-allows-broad-access-clinical-trial-data)  
48 [agreement-johnson-johnson-allows-broad-access-clinical-trial-data](http://news.yale.edu/2014/01/30/yale-program-s-agreement-johnson-johnson-allows-broad-access-clinical-trial-data)  
49  
50 [43] Castellani J. Are clinical trial data shared sufficiently today? Yes. *BMJ*. 2013;347:f1881.  
51  
52  
53  
54  
55  
56  
57  
58  
59  
60

- 1  
2  
3  
4 [44] Prasad S, Harpin V, Poole L, Zeitlin H, Jamdar S, Puvanendran K. A multi-centre,  
5 randomised, open-label study of atomoxetine compared with standard current therapy in UK  
6 children and adolescents with attention-deficit/hyperactivity disorder (ADHD). *Current Medical*  
7 *Research and Opinion*. 2007;23(2):379-94.
- 8 [45] Meehan K, Zhang F, David S, Tohen M, Janicak P, Small J, et al. A double-blind,  
9 randomized comparison of the efficacy and safety of intramuscular injections of olanzapine,  
10 lorazepam, or placebo in treating acutely agitated patients diagnosed with bipolar mania. *J Clin*  
11 *Psychopharmacol*. 2001;21(4):389-97.
- 12 [46] Zimbroff D, Warrington L, Loebel A, Yang R, Sui C. Comparison of ziprasidone and  
13 aripiprazole in acutely ill subjects with schizophrenia or schizoaffective disorder: A randomized,  
14 double-blind, 4-week study. *Int Clin Psychopharmacol*. 2007;6:363-70.
- 15 [47] Kratochvil C, Michelson D, Newcorn J, Weiss M, Busner J, Moore R, et al. High-dose  
16 atomoxetine treatment of ADHD in youths with limited response to standard doses. *J Am Acad*  
17 *Child Adolesc Psychiatry*. 2007;46(9):1128-37.
- 18 [48] Street J, Clark S, Gannon K, Cummings J, Bymaster F, Tamura R, et al. Olanzapine  
19 treatment of psychotic and behavioral symptoms in patients with Alzheimers disease in nursing  
20 care facilities. *Arch Gen Psychiatry*. 2000;57:968-76.
- 21 [49] Kamijima K, Kuboki T, Kumano H, Burt T, Cohen G, Arano. I, et al. A placebo-  
22 controlled, randomized withdrawal study of sertraline for panic disorder in Japan. *International*  
23 *Clinical Psychopharmacology*. 2005;20:265-73.
- 24 [50] Tohen M, Calabrese J, Sachs G, Banov M, Detke H, Risser R, et al. Randomized,  
25 placebo-controlled trial of olanzapine as maintenance therapy in patients with bipolar I disorder  
26 responding to acute treatment with olanzapine. *Am J Psychiatry*. 2006;163(2):247-56.
- 27  
28  
29  
30  
31  
32  
33  
34  
35  
36  
37  
38  
39  
40  
41  
42  
43  
44  
45  
46  
47  
48  
49  
50  
51  
52  
53  
54  
55  
56  
57  
58  
59  
60

Figure 1. Clinical trial summary search results

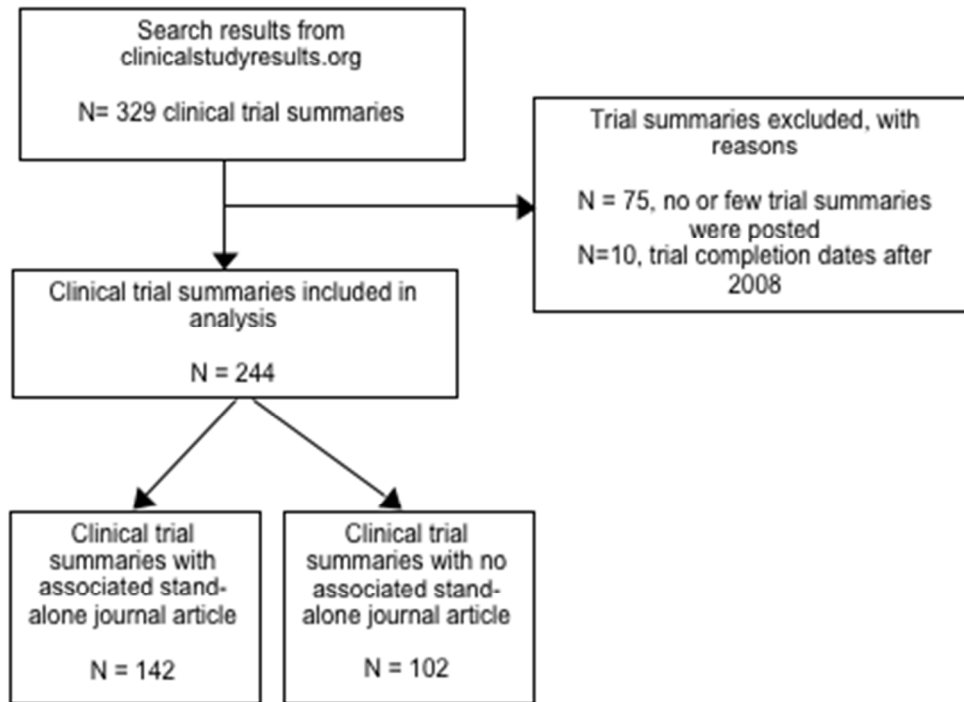

new only



Table 1. Description of included studies

|                                        | N   | Modal trial completion or article publication year | Average (median) number of publications per trial <sup>a</sup> | Average years from trial completion to article publication | Average (median) trial length in weeks | Maximum trial length in weeks | Number of drug treated participants (% as reported in summaries) | Total no. participants |
|----------------------------------------|-----|----------------------------------------------------|----------------------------------------------------------------|------------------------------------------------------------|----------------------------------------|-------------------------------|------------------------------------------------------------------|------------------------|
| <b>Aripiprazole</b>                    |     |                                                    |                                                                |                                                            |                                        |                               |                                                                  |                        |
| Trial summary                          | 28  | 2006                                               | 0.62 (1)                                                       | 2.6                                                        | 20.8 (8)                               | 140                           | 5,809                                                            | 9,935                  |
| Journal article                        | 28  | 2009                                               | --                                                             | --                                                         | 10.7 (8)                               | 52                            | 5,696 (98)                                                       | 9,728                  |
| Unpublished trial summary <sup>b</sup> | 21  | 2003                                               | --                                                             | --                                                         | 29.9 (26)                              | 94                            | 6,896                                                            | 8,112                  |
| <b>Olanzapine</b>                      |     |                                                    |                                                                |                                                            |                                        |                               |                                                                  |                        |
| Trial summary                          | 33  | 2000                                               | 1.78 (1)                                                       | 2.7                                                        | 26.5 (24)                              | 78                            | 8,515                                                            | 12,136                 |
| Journal article                        | 33  | 2002                                               | --                                                             | --                                                         | 16.8 (6)                               | 78                            | 8,225 (97)                                                       | 11,932                 |
| Unpublished trial summary              | 18  | 2005                                               | --                                                             | --                                                         | 18.7 (19)                              | 48                            | 3,120                                                            | 4,997                  |
| <b>Ziprasidone</b>                     |     |                                                    |                                                                |                                                            |                                        |                               |                                                                  |                        |
| Trial summary                          | 8   | 2005                                               | 0.79 (0)                                                       | 3.8                                                        | 17.1 (12)                              | 60                            | 910                                                              | 1,399                  |
| Journal article                        | 8   | 2007                                               | --                                                             | --                                                         | 10.5 (10)                              | 27                            | 910 (100)                                                        | 1,399                  |
| Unpublished trial summary              | 21  | 2008                                               | --                                                             | --                                                         | 38.4 (12)                              | 320                           | 3,268                                                            | 4,459                  |
| <b>Atomoxetine</b>                     |     |                                                    |                                                                |                                                            |                                        |                               |                                                                  |                        |
| Trial summary                          | 31  | 2005                                               | 1.76 (1)                                                       | 2.2                                                        | 35.9 (18)                              | 181                           | 4,313                                                            | 7,094                  |
| Journal article                        | 31  | 2007                                               | --                                                             | --                                                         | 16.7 (10)                              | 97                            | 4,138 (96)                                                       | 6,975                  |
| Unpublished trial summary              | 20  | 2006                                               | --                                                             | --                                                         | 35.7 (24)                              | 104                           | 3,640                                                            | 4,469                  |
| <b>Duloxetine</b>                      |     |                                                    |                                                                |                                                            |                                        |                               |                                                                  |                        |
| Trial summary                          | 35  | 2005                                               | 4.69 (3)                                                       | 2                                                          | 27.1 (13)                              | 103                           | 14,185                                                           | 18,334                 |
| Journal article                        | 35  | 2007                                               | --                                                             | --                                                         | 22.8 (13)                              | 103                           | 14,185 (100)                                                     | 18,334                 |
| Unpublished trial summary              | 13  | 2004                                               | --                                                             | --                                                         | 24.2 (15)                              | 62                            | 2,115                                                            | 3,413                  |
| <b>Sertraline</b>                      |     |                                                    |                                                                |                                                            |                                        |                               |                                                                  |                        |
| Trial summary                          | 7   | 2003                                               | 1.53 (1)                                                       | 2.9                                                        | 37.7 (22)                              | 128                           | 2,147                                                            | 2,326                  |
| Journal article                        | 7   | 2005                                               | --                                                             | --                                                         | 22.9 (22)                              | 52                            | 2,147 (100)                                                      | 2,326                  |
| Unpublished trial summary              | 9   | 2001                                               | --                                                             | --                                                         | 15.4 (10)                              | 36                            | 1,045                                                            | 1,541                  |
| <b>All Drugs</b>                       |     |                                                    |                                                                |                                                            |                                        |                               |                                                                  |                        |
| Trial summary                          | 142 | 2005                                               | 2 (1)                                                          | 2.5                                                        | 27.8 (12)                              | 181                           | 35,879                                                           | 51,224                 |
| Journal article                        | 142 | 2007                                               | --                                                             | --                                                         | 16.7 (11)                              | 103                           | 35,269 (98)                                                      | 50,694                 |
| Unpublished trial summary              | 102 | 2006                                               | --                                                             | --                                                         | 28.8 (16)                              | 320                           | 20,084                                                           | 26,992                 |

<sup>a</sup>Average and median number of publications reflect all publications listed on the trial summary cover page, including stand-alone journal articles, meta-analyses, sub-set analyses, and conference abstracts.

<sup>b</sup>Unpublished trial summary refers to clinical trial summaries posted on the publicly accessible clinicalstudyresults.org website, but having no associated stand-alone journal article.

Table 2. Number of serious adverse events (SAEs) reported in trial summaries and journal articles for drug-treated participants

|                                               | Number (%) of studies that report the number of SAEs <sup>a</sup> | Number of SAEs (% as reported in associated trial summaries) | Number of SAEs per patient treated <sup>b</sup> |
|-----------------------------------------------|-------------------------------------------------------------------|--------------------------------------------------------------|-------------------------------------------------|
| <b>Aripiprazole</b>                           |                                                                   |                                                              |                                                 |
| Trial summary (n=28)                          | 26 (92.9)                                                         | 364                                                          | 0.06                                            |
| Journal article (n=28)                        | 27 (96.4)                                                         | 417 (114.6%)                                                 | 0.07                                            |
| Unpublished trial summary <sup>c</sup> (n=21) | 20 (95.2)                                                         | 504                                                          | 0.07                                            |
| <b>Olanzapine</b>                             |                                                                   |                                                              |                                                 |
| Trial summary (n=33)                          | 28 (84.8)                                                         | 544                                                          | 0.06                                            |
| Journal article (n=33)                        | 11 (33.3)                                                         | 66 (12.1%)                                                   | 0.008                                           |
| Unpublished trial summary (n=18)              | 17 (94.4)                                                         | 302                                                          | 0.10                                            |
| <b>Ziprasidone</b>                            |                                                                   |                                                              |                                                 |
| Trial summary (n=8)                           | 7 (87.5)                                                          | 117                                                          | 0.13                                            |
| Journal article (n=8)                         | 5 (62.5)                                                          | 53 (45.3%)                                                   | 0.06                                            |
| Unpublished trial summary (n=21)              | 21 (100.0)                                                        | 446                                                          | 0.14                                            |
| <b>Atomoxetine</b>                            |                                                                   |                                                              |                                                 |
| Trial summary (n=31)                          | 25 (80.6)                                                         | 88                                                           | 0.02                                            |
| Journal article (n=31)                        | 14 (45.2)                                                         | 13 (14.8%)                                                   | 0.003                                           |
| Unpublished trial summary (n=20)              | 17 (85.0)                                                         | 35                                                           | 0.01                                            |
| <b>Duloxetine</b>                             |                                                                   |                                                              |                                                 |
| Trial summary (n=35)                          | 32 (91.4)                                                         | 453                                                          | 0.03                                            |
| Journal article (n=35)                        | 27 (77.1)                                                         | 349 (77%)                                                    | 0.02                                            |
| Unpublished trial summary (n=13)              | 12 (92.3)                                                         | 117                                                          | 0.06                                            |
| <b>Sertraline</b>                             |                                                                   |                                                              |                                                 |
| Trial summary (n=7)                           | 7 (100.0)                                                         | 42                                                           | 0.02                                            |
| Journal article (n=7)                         | 2 (28.6)                                                          | 16 (38.1%)                                                   | 0.007                                           |
| Unpublished trial summary (n=9)               | 8 (88.9)                                                          | 19                                                           | 0.02                                            |
| <b>All Drugs</b>                              |                                                                   |                                                              |                                                 |
| Trial summary (n=142)                         | 125 (88.0)                                                        | 1,608                                                        | 0.05                                            |
| Journal article (n=142)                       | 85 (59.9)                                                         | 914 (56.8%)                                                  | 0.03                                            |
| Unpublished trial summary (n=102)             | 95 (93.1)                                                         | 1,423                                                        | 0.07                                            |

<sup>a</sup>The figures in this column indicate those publications that reported the number of SAEs that occurred. Some publications contained no statement about the occurrence of SAEs or contained an ambiguous statement without specifying the actual number of SAEs, such as “No SAEs thought to be related to study medication occurred.”

<sup>b</sup>The numerator equals the number of events; the denominator equals the total number of drug-treated participants, as reported in Table 1.

<sup>c</sup>Unpublished trial summary refers to clinical trial summaries posted on the publicly accessible clinicalstudyresults.org website, but having no associated stand-alone journal article.

Table 3. Number of deaths, suicide- and homicide-related events, and psychiatric serious adverse events in drug-treated participants

|                                               | Death                  | Suicide, completed | Suicidal ideation, attempts, injury | Homicidal ideation | New or worsened psychiatric symptoms | Total      |
|-----------------------------------------------|------------------------|--------------------|-------------------------------------|--------------------|--------------------------------------|------------|
| <b>Aripiprazole</b>                           |                        |                    |                                     |                    |                                      |            |
| Trial summary (n=28)                          | 79                     | 1                  | 4                                   | 0                  | 79                                   | 163        |
| Journal article (n=28)                        | 27 (34.2) <sup>a</sup> | 1 (100.0)          | 5 (125.0)                           | 0                  | 66 (83.5)                            | 99 (60.7)  |
| Unpublished trial summary <sup>b</sup> (n=21) | 15                     | 1                  | 10                                  | 0                  | 92                                   | 118        |
| <b>Olanzapine</b>                             |                        |                    |                                     |                    |                                      |            |
| Trial summary (n=33)                          | 50                     | 9                  | 18                                  | 0                  | 85                                   | 162        |
| Journal article (n=33)                        | 19 (38.0)              | 1 (11.1)           | 4 (22.2)                            | 0                  | 14 (16.5)                            | 38 (23.5)  |
| Unpublished trial summary (n=18)              | 7                      | 3                  | 21                                  | 1                  | 95                                   | 127        |
| <b>Ziprasidone</b>                            |                        |                    |                                     |                    |                                      |            |
| Trial summary (n=8)                           | 0                      | 1                  | 13                                  | 1                  | 30                                   | 45         |
| Journal article (n=8)                         | 0 (0)                  | 1 (100.0)          | 5 (38.5)                            | 1 (100.0)          | 14 (46.7)                            | 20 (44.4)  |
| Unpublished trial summary (n=21)              | 18                     | 1                  | 23                                  | 3                  | 141                                  | 186        |
| <b>Atomoxetine</b>                            |                        |                    |                                     |                    |                                      |            |
| Trial summary (n=31)                          | 0                      | 0                  | 7                                   | 0                  | 6                                    | 13         |
| Journal article (n=31)                        | 0                      | 0                  | 0 (0)                               | 0                  | 0 (0)                                | 0 (0)      |
| Unpublished trial summary (n=20)              | 1                      | 0                  | 5                                   | 0                  | 5                                    | 11         |
| <b>Duloxetine</b>                             |                        |                    |                                     |                    |                                      |            |
| Trial summary (n=35)                          | 11                     | 4                  | 40                                  | 0                  | 27                                   | 82         |
| Journal article (n=35)                        | 11 (100.0)             | 4 (100.0)          | 33 (82.5)                           | 0                  | 21 (77.8)                            | 69 (84.1)  |
| Unpublished trial summary (n=13)              | 3                      | 0                  | 10                                  | 0                  | 20                                   | 33         |
| <b>Sertraline</b>                             |                        |                    |                                     |                    |                                      |            |
| Trial summary (n=7)                           | 11                     | 0                  | 5                                   | 0                  | 11                                   | 27         |
| Journal article (n=7)                         | 0 (0)                  | 0                  | 0 (0)                               | 0 (0)              | 0 (0)                                | 0 (0)      |
| Unpublished trial summary (n=9)               | 1                      | 0                  | 10                                  | 1                  | 4                                    | 16         |
| <b>All Drugs</b>                              |                        |                    |                                     |                    |                                      |            |
| Trial summary (n=142)                         | 151                    | 15                 | 87                                  | 1                  | 238                                  | 492        |
| Journal article (n=142)                       | 57 (37.7)              | 7 (46.7)           | 47 (54.0)                           | 1 (100.0)          | 115 (48.3)                           | 227 (46.1) |
| Unpublished trial summary (n=102)             | 45                     | 5                  | 79                                  | 5                  | 357                                  | 491        |

<sup>a</sup>Percent as reported in associated trial summaries.

<sup>b</sup>Unpublished trial summary refers to clinical trial summaries posted on the publicly accessible [clinicalstudyresults.org](http://clinicalstudyresults.org) website, but having no associated stand-alone journal article.

Table 4. Percentage of trial summary -journal article pairs that report serious adverse event (SAE) data consistently across sources

| Summary-Article Pairs | Number of SAEs            |                                 | Description of SAEs       |
|-----------------------|---------------------------|---------------------------------|---------------------------|
|                       | Consistent across sources | > 20% difference across sources | Consistent across sources |
| Aripiprazole (n=28)   | 67.9                      | 25.0                            | 28.6                      |
| Olanzapine (n=33)     | 27.3                      | 72.7                            | 30.3                      |
| Ziprasidone (n=8)     | 37.5                      | 37.5                            | 37.5                      |
| Atomoxetine (n=31)    | 54.8                      | 45.2                            | 42.0                      |
| Duloxetine (n=35)     | 62.9                      | 37.1                            | 31.4                      |
| Sertraline (n=7)      | 28.6                      | 71.4                            | 14.3                      |
| All Drugs (n=142)     | 50.7                      | 49.2                            | 32.4                      |

Table 5. Explanations for Discrepant Reporting of SAEs between Journal Articles and Trial Summaries

| Category of discrepant reporting             | Specific explanation for discrepant reporting                                                   | Example                                                                                                                                                                                                                                                                                                                                                                                                                                                                                                                                                                                                                                                                                                                                                                                                                                                                                    |
|----------------------------------------------|-------------------------------------------------------------------------------------------------|--------------------------------------------------------------------------------------------------------------------------------------------------------------------------------------------------------------------------------------------------------------------------------------------------------------------------------------------------------------------------------------------------------------------------------------------------------------------------------------------------------------------------------------------------------------------------------------------------------------------------------------------------------------------------------------------------------------------------------------------------------------------------------------------------------------------------------------------------------------------------------------------|
| Difference in study length or phase reported | Reporting only one phase of a multi-phase trial                                                 | In atomoxetine trial 6962, the journal article cites zero SAEs in the 10-week acute phase [44]; three SAEs that were thought to be related to study medication (suicidal ideation, aggression, and self-injurious behavior) occurred in the 22-week extension phase reported in the trial summary.                                                                                                                                                                                                                                                                                                                                                                                                                                                                                                                                                                                         |
|                                              | Not reporting SAEs that occurred during follow-up                                               | In olanzapine trial 3045, the journal article stated “there were no deaths during the study,” but failed to cite the death that occurred within 30 days after the study [45].                                                                                                                                                                                                                                                                                                                                                                                                                                                                                                                                                                                                                                                                                                              |
| Difference in reporting criteria used        | Not reporting SAEs that were presumed to be unrelated to the study drug                         | In these cases, journal articles would either make no mention at all of SAEs or would include a statement implying that SAEs did occur but without providing an exact figure, such as “No patients in either treatment group had a serious adverse event that was considered study medication related” [46].                                                                                                                                                                                                                                                                                                                                                                                                                                                                                                                                                                               |
|                                              | Not reporting SAEs that were not statistically significantly different between treatment groups | In atomoxetine trial 5831, two SAEs thought to be “unlikely but possibly related” to the study drug were unreported in the associated journal article [47].<br><br>In olanzapine trial 1032, 28 SAEs occurred in the randomized phase on which the journal article presents results. The journal article, however, contains no statement about SAE occurrence presumably because, as the trial summary indicates, there were no statistically significant differences in SAEs between treatment groups [48].                                                                                                                                                                                                                                                                                                                                                                               |
| Apparent selective reporting of data         | Omissions of SAE data                                                                           | In sertraline trial 1060, the trial summary cites 5 SAEs in drug-treated participants, one of which occurred in the open-label phase and was thought by investigators to be related to the study drug. The journal article reports on the full length of the trial (open and double-blind phases), but only includes this statement related to SAEs: “No subjects had serious adverse events related to study treatment in either treatment group <i>during the double-blind phase</i> ” [49] [emphasis added].<br><br>In olanzapine trial 2354, the journal article reports a lower number of SAEs than cited for the same study phase in the trial summary, and describes “the majority” of SAEs as “worsening of the illness” [50]. The trial summary reports a higher incidence of SAEs and more precisely details the events as suicidal ideation, suicide attempt, mania, and so on. |

Appendix Table 1. Trial completion dates and time to journal article publication for six psychotropic drugs on clinicalstudyresults.org

|                                                   | 1999 or earlier | 2000  | 2001   | 2002   | 2003   | 2004   | 2005   | 2006   | 2007   | 2008  | 2009 or later |
|---------------------------------------------------|-----------------|-------|--------|--------|--------|--------|--------|--------|--------|-------|---------------|
| <b>Aripiprazole</b>                               |                 |       |        |        |        |        |        |        |        |       |               |
| Number of completed trials                        | 0               | 0     | 3      | 5      | 10     | 5      | 4      | 11     | 8      | 3     | 3             |
| (% published as stand-alone article) <sup>a</sup> |                 |       | (66.7) | (40)   | (40)   | (100)  | (75)   | (54.5) | (37.5) | (100) | (0)           |
| Average years to article publication              | --              | --    | 3      | 5      | 5      | 2.4    | 3      | 2      | 1.7    | 1     | n/a           |
| <b>Olanzapine</b>                                 |                 |       |        |        |        |        |        |        |        |       |               |
| Number of completed trials                        | 12              | 7     | 2      | 7      | 3      | 0      | 7      | 8      | 4      | 1     | 0             |
| (% published as stand-alone article)              | (91.7)          | (100) | (100)  | (85.7) | (33.3) |        | (28.6) | (37.5) | (0)    | (100) |               |
| Average years to article publication              | 2.2             | 2.3   | 4      | 3.5    | 3      | --     | 3      | 3      | n/a    | 1     | --            |
| <b>Ziprasidone</b>                                |                 |       |        |        |        |        |        |        |        |       |               |
| Number of completed trials                        | 0               | 0     | 0      | 2      | 5      | 4      | 7      | 2      | 1      | 8     | 5             |
| (% published as stand-alone article)              |                 |       |        | (50)   | (20)   | (25)   | (42.9) | (100)  | (0)    | (0)   | (0)           |
| Average years to article publication              | --              | --    | --     | 5      | 2      | 6      | 3.7    | 3      | n/a    | n/a   | n/a           |
| <b>Atomoxetine</b>                                |                 |       |        |        |        |        |        |        |        |       |               |
| Number of completed trials                        | 1               | 2     | 6      | 6      | 6      | 7      | 8      | 12     | 3      | 0     | 0             |
| (% published as stand-alone article)              | (100)           | (100) | (66.7) | (83.3) | (66.7) | (71.4) | (75)   | (16.7) | (66.7) |       |               |
| Average years to article publication              | 3               | 2     | 2.3    | 2.6    | 2.8    | 2.8    | 1.8    | 1      | 1      | --    | --            |
| <b>Duloxetine</b>                                 |                 |       |        |        |        |        |        |        |        |       |               |
| Number of completed trials                        | 3               | 1     | 6      | 4      | 5      | 7      | 10     | 4      | 8      | 0     | 1             |
| (% published as stand-alone article)              | (0)             | (100) | (66.7) | (100)  | (100)  | (57.1) | (90)   | (75)   | (62.5) |       | (0)           |
| Average years to article publication              | n/a             | 2     | 1.8    | 3      | 2.8    | 2      | 2.1    | 1.3    | 1.4    | --    | n/a           |
| <b>Sertraline</b>                                 |                 |       |        |        |        |        |        |        |        |       |               |
| Number of completed trials                        | 4               | 0     | 3      | 0      | 5      | 0      | 2      | 0      | 2      | 0     | 0             |
| (% published as stand-alone article)              | (75)            |       | (0)    |        | (80)   |        | (0)    |        | (0)    |       |               |
| Average years to article publication              | 4.3             | --    | n/a/   | --     | 1.8    | --     | n/a    | --     | n/a    | --    | --            |
| <b>All Drugs</b>                                  |                 |       |        |        |        |        |        |        |        |       |               |
| Number of completed trials                        | 20              | 10    | 20     | 24     | 34     | 23     | 38     | 37     | 26     | 12    | 10            |
| (% published as stand-alone article)              | (75)            | (100) | (60)   | (75)   | (56)   | (65)   | (60)   | (43)   | (38)   | (33)  | (0)           |
| Average years to article publication              | 3.2             | 2.1   | 2.8    | 3.8    | 2.9    | 3.3    | 2.7    | 2.1    | 1.4    | 1     | n/a           |

<sup>a</sup> Meta-analyses and sub-set analyses published in journals and conference abstracts are not included in the percent published.

Appendix Table 2: Drug-treated participants and serious adverse events (SAEs) among ten trial summaries of clinical trials completed in 2009 or later (excluded from the published analysis)

|              | Number of excluded trial summaries | Number of drug- treated participants | Total number of SAEs in drug-treated participants | Number of SAEs |                    |                                    |                                      |
|--------------|------------------------------------|--------------------------------------|---------------------------------------------------|----------------|--------------------|------------------------------------|--------------------------------------|
|              |                                    |                                      |                                                   | Death          | Suicide, completed | Suicidal ideation, attempt, injury | New or worsened psychiatric symptoms |
| Aripiprazole | 3                                  | 676                                  | 39                                                | 1              | 1                  | 1                                  | 2                                    |
| Olanzapine   | 0                                  | NA                                   | NA                                                | NA             | NA                 | NA                                 | NA                                   |
| Ziprasidone  | 5                                  | 1436                                 | 124                                               | 3              | 2                  | 9                                  | 57                                   |
| Atomoxetine  | 0                                  | NA                                   | NA                                                | NA             | NA                 | NA                                 | NA                                   |
| Duloxetine   | 1                                  | 657                                  | 2                                                 | 0              | 0                  | 0                                  | 1                                    |
| Sertraline   | 1                                  | 157                                  | 2                                                 | 0              | 0                  | 1                                  | 0                                    |
| All Drugs    | 10                                 | 2926                                 | 167                                               | 4              | 3                  | 11                                 | 60                                   |

## STROBE Statement

“Differences in Reporting Serious Adverse Events in Industry-Sponsored Clinical Trial Registries and Journal Articles on Antidepressant and Antipsychotic Drugs – A Cross-sectional Study”

|                              | Page No | Recommendation                                                                                                                                                                                                                                                                                            |
|------------------------------|---------|-----------------------------------------------------------------------------------------------------------------------------------------------------------------------------------------------------------------------------------------------------------------------------------------------------------|
| <b>Title and abstract</b>    | 1       | (a) Indicate the study’s design with a commonly used term in the title or the abstract                                                                                                                                                                                                                    |
|                              | 2       | (b) Provide in the abstract an informative and balanced summary of what was done and what was found                                                                                                                                                                                                       |
| <b>Introduction</b>          |         |                                                                                                                                                                                                                                                                                                           |
| Background/rationale         | 4       | Explain the scientific background and rationale for the investigation being reported                                                                                                                                                                                                                      |
| Objectives                   | 4-5     | State specific objectives, including any prespecified hypotheses                                                                                                                                                                                                                                          |
| <b>Methods</b>               |         |                                                                                                                                                                                                                                                                                                           |
| Study design                 | 6-8     | Present key elements of study design early in the paper                                                                                                                                                                                                                                                   |
| Setting                      | 6-7     | Describe the setting, locations, and relevant dates, including periods of recruitment, exposure, follow-up, and data collection                                                                                                                                                                           |
| Participants                 | 6-7     | <i>Cross-sectional study</i> —Give the eligibility criteria, and the sources and methods of selection of participants                                                                                                                                                                                     |
| Variables                    | 8-9     | Clearly define all outcomes, exposures, predictors, potential confounders, and effect modifiers. Give diagnostic criteria, if applicable                                                                                                                                                                  |
| Data sources/<br>measurement | 6-9     | For each variable of interest, give sources of data and details of methods of assessment (measurement). Describe comparability of assessment methods if there is more than one group                                                                                                                      |
| Bias                         | 8       | Describe any efforts to address potential sources of bias                                                                                                                                                                                                                                                 |
| Study size                   | 6-7     | Explain how the study size was arrived at                                                                                                                                                                                                                                                                 |
| Quantitative variables       | 9       | Explain how quantitative variables were handled in the analyses. If applicable, describe which groupings were chosen and why                                                                                                                                                                              |
| Statistical methods          | 9       | (a) Describe all statistical methods, including those used to control for confounding                                                                                                                                                                                                                     |
|                              | n/a     | (b) Describe any methods used to examine subgroups and interactions                                                                                                                                                                                                                                       |
|                              | n/a     | (c) Explain how missing data were addressed                                                                                                                                                                                                                                                               |
|                              | n/a     | (d) <i>Cohort study</i> —If applicable, explain how loss to follow-up was addressed<br><i>Case-control study</i> —If applicable, explain how matching of cases and controls was addressed<br><i>Cross-sectional study</i> —If applicable, describe analytical methods taking account of sampling strategy |
|                              | n/a     | (e) Describe any sensitivity analyses                                                                                                                                                                                                                                                                     |



**Results**

|                  |       |                                                                                                                                                                                                   |
|------------------|-------|---------------------------------------------------------------------------------------------------------------------------------------------------------------------------------------------------|
| Participants     | 6-7   | (a) Report numbers of individuals at each stage of study—eg numbers potentially eligible, examined for eligibility, confirmed eligible, included in the study, completing follow-up, and analysed |
|                  | 6-7   | (b) Give reasons for non-participation at each stage                                                                                                                                              |
|                  | n/a   | (c) Consider use of a flow diagram                                                                                                                                                                |
| Descriptive data | 10    | (a) Give characteristics of study participants (eg demographic, clinical, social) and information on exposures and potential confounders                                                          |
|                  | n/a   | (b) Indicate number of participants with missing data for each variable of interest                                                                                                               |
| Outcome data     | 10-12 | <i>Cross-sectional study</i> —Report numbers of outcome events or summary measures                                                                                                                |
| Main results     | 10-12 | (a) Give unadjusted estimates and, if applicable, confounder-adjusted estimates and their precision (eg, 95% confidence interval).                                                                |
|                  | n/a   | (b) Report category boundaries when continuous variables were categorized                                                                                                                         |
|                  |       | (c) If relevant, consider translating estimates of relative risk into absolute risk for a meaningful time period                                                                                  |
| Other analyses   | 13    | Report other analyses done—eg analyses of subgroups and interactions, and sensitivity analyses                                                                                                    |

**Discussion**

|                  |           |                                                                                                                                                                            |
|------------------|-----------|----------------------------------------------------------------------------------------------------------------------------------------------------------------------------|
| Key results      | 14-16     | Summarise key results with reference to study objectives                                                                                                                   |
| Limitations      | 17        | Discuss limitations of the study, taking into account sources of potential bias or imprecision. Discuss both direction and magnitude of any potential bias                 |
| Interpretation   | 14-16, 18 | Give a cautious overall interpretation of results considering objectives, limitations, multiplicity of analyses, results from similar studies, and other relevant evidence |
| Generalisability | 17        | Discuss the generalisability (external validity) of the study results                                                                                                      |

**Other information**

|         |    |                                                                                                                                                               |
|---------|----|---------------------------------------------------------------------------------------------------------------------------------------------------------------|
| Funding | 19 | Give the source of funding and the role of the funders for the present study and, if applicable, for the original study on which the present article is based |
|---------|----|---------------------------------------------------------------------------------------------------------------------------------------------------------------|

## Summary ID#4091

### Clinical Study Summary: Study F1J-MC-HMAT Study Group B

|                                                                                                                                                                                                                                                                                                                                                                                                                                                                                                                                                                                                                                                                                                                                                                                                                                                                                                                                                                                                                                                                                                                                                                                                                                                                                                                                                                                                                                                                                                                                                                                                                                                                                                                                                                                                                                                                                                                                                                                                                                                                                                                                                                                                                                                                                                                                                                                                                                                                                                                                                                                                                                                                                                                                                                                                                                                                            |                                |
|----------------------------------------------------------------------------------------------------------------------------------------------------------------------------------------------------------------------------------------------------------------------------------------------------------------------------------------------------------------------------------------------------------------------------------------------------------------------------------------------------------------------------------------------------------------------------------------------------------------------------------------------------------------------------------------------------------------------------------------------------------------------------------------------------------------------------------------------------------------------------------------------------------------------------------------------------------------------------------------------------------------------------------------------------------------------------------------------------------------------------------------------------------------------------------------------------------------------------------------------------------------------------------------------------------------------------------------------------------------------------------------------------------------------------------------------------------------------------------------------------------------------------------------------------------------------------------------------------------------------------------------------------------------------------------------------------------------------------------------------------------------------------------------------------------------------------------------------------------------------------------------------------------------------------------------------------------------------------------------------------------------------------------------------------------------------------------------------------------------------------------------------------------------------------------------------------------------------------------------------------------------------------------------------------------------------------------------------------------------------------------------------------------------------------------------------------------------------------------------------------------------------------------------------------------------------------------------------------------------------------------------------------------------------------------------------------------------------------------------------------------------------------------------------------------------------------------------------------------------------------|--------------------------------|
| <b>Title of Study:</b> Duloxetine Versus Placebo and Paroxetine in the Acute Treatment of Major Depression                                                                                                                                                                                                                                                                                                                                                                                                                                                                                                                                                                                                                                                                                                                                                                                                                                                                                                                                                                                                                                                                                                                                                                                                                                                                                                                                                                                                                                                                                                                                                                                                                                                                                                                                                                                                                                                                                                                                                                                                                                                                                                                                                                                                                                                                                                                                                                                                                                                                                                                                                                                                                                                                                                                                                                 |                                |
| <b>Investigator(s):</b> This multicenter study included 20 principal investigators.                                                                                                                                                                                                                                                                                                                                                                                                                                                                                                                                                                                                                                                                                                                                                                                                                                                                                                                                                                                                                                                                                                                                                                                                                                                                                                                                                                                                                                                                                                                                                                                                                                                                                                                                                                                                                                                                                                                                                                                                                                                                                                                                                                                                                                                                                                                                                                                                                                                                                                                                                                                                                                                                                                                                                                                        |                                |
| <b>Study Center(s):</b> There were 22 study sites (two investigators had satellite sites) in the United States.                                                                                                                                                                                                                                                                                                                                                                                                                                                                                                                                                                                                                                                                                                                                                                                                                                                                                                                                                                                                                                                                                                                                                                                                                                                                                                                                                                                                                                                                                                                                                                                                                                                                                                                                                                                                                                                                                                                                                                                                                                                                                                                                                                                                                                                                                                                                                                                                                                                                                                                                                                                                                                                                                                                                                            |                                |
| <b>Length of Study:</b> 11 months<br>Date first patient enrolled: 09 March 2000<br>Date last patient completed: 06 February 2001                                                                                                                                                                                                                                                                                                                                                                                                                                                                                                                                                                                                                                                                                                                                                                                                                                                                                                                                                                                                                                                                                                                                                                                                                                                                                                                                                                                                                                                                                                                                                                                                                                                                                                                                                                                                                                                                                                                                                                                                                                                                                                                                                                                                                                                                                                                                                                                                                                                                                                                                                                                                                                                                                                                                           | <b>Phase of Development:</b> 3 |
| <p><b>Objectives:</b> The primary objective of this study was to demonstrate that duloxetine 40 mg twice daily (BID) is superior to placebo in the acute treatment of patients with <i>Diagnostic and Statistical Manual of Mental Disorders</i>, Fourth Edition (DSM-IV)–defined major depressive disorder (MDD).</p> <p>The secondary objectives of this study were:</p> <ul style="list-style-type: none"> <li>To compare the safety of duloxetine 20 mg BID, duloxetine 40 mg BID, placebo, and paroxetine using information on discontinuation rates, treatment-emergent adverse events (TEAEs), discontinuation-emergent adverse events, laboratory analyses, vital signs, and electrocardiograms (ECGs).</li> <li>To compare the efficacy of duloxetine 40 mg BID with paroxetine as measured by a noninferiority test of mean 17-item Hamilton Depression Rating Scale (HAMD<sub>17</sub>) total scores at Visit 8. Data from each of the two studies (HMAT Study Group A and Study Group B) will be combined for this comparison.</li> <li>To assess the efficacy of duloxetine 20 mg BID and duloxetine 40 mg BID compared with placebo as measured by response and remission rates.</li> <li>To compare the time to onset of action (defined as time to meeting responder criteria) of duloxetine 20 mg BID, duloxetine 40 mg BID, and paroxetine.</li> <li>To compare the efficacy of duloxetine 20 mg BID, duloxetine 40 mg BID, placebo, and paroxetine on anxiety symptoms associated with depression as measured by mean endpoint scores on the Hamilton Anxiety Rating Scale (HAMA) and the anxiety subscale of the HAMD<sub>17</sub>.</li> <li>To compare the efficacy of duloxetine 20 mg BID, duloxetine 40 mg BID, placebo, and paroxetine as measured by mean endpoint scores (after adjusting for baseline differences) on the Clinical Global Impressions of Severity scale (CGI-Severity), the Montgomery and Asberg Depression Rating Scale (MADRS), HAMD<sub>17</sub> subfactor scores, and endpoint scores on the Patient's Global Impressions of Improvement scale (PGI-Improvement).</li> <li>To compare the efficacy of duloxetine 20 mg BID, duloxetine 40 mg BID, placebo, and paroxetine on somatic complaints of pain using the Somatic Symptom Inventory scale (SSI) and Visual Analog Scales (VAS).</li> <li>To compare the impact of treatment with duloxetine 20 mg BID, duloxetine 40 mg BID, placebo, and paroxetine on sexual functioning as measured by the Arizona Sexual Experiences Scale (ASEX).</li> <li>To compare the impact of treatment with duloxetine 20 mg BID, duloxetine 40 mg BID, placebo, and paroxetine on quality of life as measured by the Quality of Life in Depression Scale (QLDS), and on medical resource utilization and work productivity as measured by the Resource Utilization scale.</li> </ul> |                                |

**Study Design:** Multicenter, parallel, double-blind, randomized, placebo- and active comparator-controlled study with blinded placebo lead-in and placebo lead-out. The protocol consisted of two identical studies conducted in parallel and reported separately (Study Group A and Study Group B). The study consisted of two study periods.

Study Period I was the 1-week screening phase of the study, and Study Period II was an 11-week acute therapy phase in which patients were assessed weekly from Visit 2 (Week 0) to Visit 5 (Week 3) and every other week from Visit 5 (Week 3) to Visit 9 (Week 11). This study design employed double-blind, variable-duration placebo lead-in and lead-out periods to blind patients and investigators at the start and end of active therapy. Figure HMA**T**b.1 illustrates the study design.

**Number of Patients:**

Planned: 356 patients (89 per treatment group)

Randomized: 86 Duloxetine 20 mg BID; 91 Duloxetine 40 mg BID ; 89 Placebo; 87 Paroxetine 20 mg QD.

Completed: 55 Duloxetine 20 mg BID; 53 Duloxetine 40 mg BID; 52 Placebo; 49 Paroxetine 20 mg QD.

**Diagnosis and Main Criteria for Inclusion:** Male and female outpatients of at least 18 years of age with a primary diagnosis of MDD as defined by the DSM-IV, and confirmed by use of the Mini International Neuropsychiatric Interview (MINI). Patients were required to have a HAMD<sub>17</sub> total score  $\geq 15$  and a CGI-Severity total score  $\geq 4$  at both Visit 1 and Visit 2.

**Test Product, Dose, and Mode of Administration:** Duloxetine capsules, 20 mg; patients took 40 mg orally twice daily or 20 mg orally twice daily.

**Duration of Treatment:**

Duloxetine: 8 weeks

Paroxetine: 8 weeks

Placebo: 11 weeks

**Reference Therapy, Dose, and Mode of Administration:**

Paroxetine 20 mg capsules; patients took 20 mg orally once daily.

Placebo capsules

**Variables:**

**Efficacy:** The primary efficacy measure was the HAMD<sub>17</sub> total score. Secondary efficacy measures included HAMD<sub>17</sub> response rates (50% reduction from baseline to endpoint), HAMD<sub>17</sub> remission rates (endpoint score  $\leq 7$ ), time to sustained response, and time to sustained remission. Other secondary measures included the HAMD<sub>17</sub> subfactors and individual items, MADRS, CGI-Severity, PGI-Improvement, HAMA, Somatic Symptom Inventory (SSI) 26- and 28-item scale, and Visual Analog Scales (VAS) for pain.

**Safety:** Safety was evaluated through the collection and reporting of discontinuation rates, TEAEs, discontinuation-emergent adverse events, laboratory analyses, vital signs, ECGs, and the ASEX.

**Health Outcomes:** Health outcomes were evaluated using the QLDS scale and Health Resource Utilization scales. Health Resource Utilization results will not be reported in this synopsis.

**Evaluation Methods:**Statistical:

The primary efficacy comparison was between duloxetine 40 mg BID and placebo, based on the likelihood-based repeated measures analysis. The terms in the repeated measure analysis model included treatment, visit, investigative site, baseline score, and the interactions of visit with treatment and baseline score. For secondary measures, an analysis of covariance (ANCOVA)/analysis of variance (ANOVA) model containing terms for treatment, investigator, and baseline score (no baseline score term in ANOVA model) was used for continuous variables. Categorical variables such as response and remission rates were evaluated using Fisher's exact test and the Cochran-Mantel-Haenszel (CMH) chi-square test with investigative site as strata. Time to event data, such as time to onset of action, were analyzed using the Kaplan-Meier method, and the treatment group differences were tested by the log-rank and Wilcoxon tests.

An intent-to-treat (ITT) principle was applied in all efficacy and safety analyses. For all total scores calculated from individual items, if any of the individual items was missing, the corresponding total score was considered missing. Sites with fewer than 8 randomly assigned patients with baseline and at least one postbaseline (Visit 4 to Visit 8) HAMD<sub>17</sub> total score were pooled. If this resulted in a pooled site with fewer than 8 patients, these patients were pooled with the next smallest site. For efficacy and safety analyses, treatment group differences were tested at a 2-sided significance level of 0.05.

The planned sample size (356 patients) provides 83% power to detect a difference between the duloxetine 40 mg BID and placebo groups of 3.25 points in mean change from baseline to endpoint of the HAMD<sub>17</sub> total score, assuming a common standard deviation of 7.0, 90% of patients would provide at least one baseline and one postbaseline assessment, and using a two-sided test with  $\alpha=0.05$ . Using data pooled from Study Group A and Study Group B, this sample size also provides 80% power to test the non-inferiority of duloxetine 40 mg BID compared with paroxetine using a one-sided 97.5% confidence interval and an equivalence limit of -2.2 for mean HAMD<sub>17</sub> scores.

**Summary:**

Disposition/Demographics (Table HMA**T**b.1): A total of 353 patients were randomly assigned and enrolled into the study. Of these, 209 patients completed the acute therapy phase (placebo, n=52; duloxetine 20 mg BID, n=55; duloxetine 40 mg BID, n=53; paroxetine 20 mg QD, n=49) and 206 completed the entire study. The percentages of patients who discontinued for any reason during the acute therapy phase were similar among the four treatment groups. No statistically significant differences were observed among treatment groups with regard to age, gender, origin, or height. Patients had a mean age of approximately 40 years, with the majority being Caucasian and female.

Efficacy Measures (Tables HMA**T**b.2, Table HMA**T**b.3): Patients treated with duloxetine at both doses (20 mg BID and 40 mg BID) had statistically significantly greater improvement in the primary efficacy measure (HAMD<sub>17</sub> total score) compared with placebo-treated patients, by repeated measures analysis. Paroxetine-treated patients did not differ statistically significantly from the placebo group on this measure. Mean change analyses revealed the same results. Patients treated with duloxetine 40 mg BID showed statistically significantly greater improvement in scores on the primary efficacy measure (HAMD<sub>17</sub> total score) compared with paroxetine-treated patients at endpoint.

Patients treated with duloxetine 40 mg BID met the criteria for treatment response and remission at endpoint statistically significantly more frequently than did patients treated with placebo. Patients treated with either duloxetine 40 mg BID or paroxetine had statistically significantly shorter time to first response than did patients treated with placebo.

1  
2  
3  
4  
5  
6  
7  
8  
9  
10  
11  
12  
13  
14  
15  
16  
17  
18  
19  
20  
21  
22  
23  
24  
25  
26  
27  
28  
29  
30  
31  
32  
33  
34  
35  
36  
37  
38  
39  
40  
41  
42  
43  
44  
45  
46  
47  
48  
49  
50  
51  
52  
53  
54  
55  
56  
57  
58  
59  
60

Patients treated with duloxetine 40 mg BID showed statistically significantly greater improvement on the HAMD<sub>17</sub> subfactor scores of Anxiety/Somatization, Core Factor, Maier, and Retardation as compared with placebo-treated patients.

Patients treated with duloxetine 40 mg BID showed statistically significantly greater improvement on the MADRS total score compared with placebo-treated patients, by repeated measures analysis. Mean change analysis revealed the same result. Duloxetine 20 mg BID, paroxetine- and placebo-treated patients did not differ statistically significantly on this measure.

Patients treated with duloxetine 40 mg BID showed statistically significantly greater improvement on the HAMA scale compared with placebo-treated patients (despite the fact that this trial excluded patients with primary anxiety disorders). Mean change analyses revealed the same result. Paroxetine- and placebo-treated patients did not differ statistically significantly on this measure.

Patients treated with duloxetine 40 mg BID showed statistically significantly greater improvement on the Visual Analog Scale (VAS) for overall pain severity compared with placebo-treated patients, and showed marginally statistically significantly greater improvement on the VAS for amount of time in pain while awake. Mean change analyses revealed the same results.

Patients treated with duloxetine 40 mg BID showed statistically significantly greater improvement on the Quality of Life in Depression Scale (QLDS), and showed a statistically significantly greater percentage of patients with reductions in the types of health care providers visited and the number of visits to health care providers, compared with placebo-treated patients.

There were statistically significantly fewer discontinuations due to perceived lack of efficacy for patients treated with both doses of duloxetine compared with placebo-treated patients.

Using 2.2 as the noninferiority margin, it is shown that duloxetine 40 mg BID treatment was noninferior to paroxetine treatment using either repeated measure analysis or mean change analysis. In addition, even when using a more stringent noninferiority margin than 2.2 (namely, using one-half of the absolute gain of paroxetine over placebo), it remains true that duloxetine 40 mg BID treatment was noninferior to paroxetine treatment using repeated measures analysis.

#### **Safety — Acute Therapy Phase:**

Deaths/Serious Adverse Events/Discontinuations Due to Adverse Events: No patients died during this study. Two patients experienced serious adverse events postrandomization. One patient receiving duloxetine 40 mg BID had an accidental injury falling from a horse, suffering a concussion and a subsequent seizure. One patient receiving paroxetine relapsed into alcohol abuse, suffered alcohol withdrawal symptoms, and was admitted for detoxification. In the acute therapy phase 40 (11.3%) of 353 discontinued due to an adverse event. There were no statistically significant differences among treatment groups with respect to adverse events reported as a reason for discontinuation in the acute therapy phase. The percentages of patients who discontinued for any reason were similar among the four treatment groups.

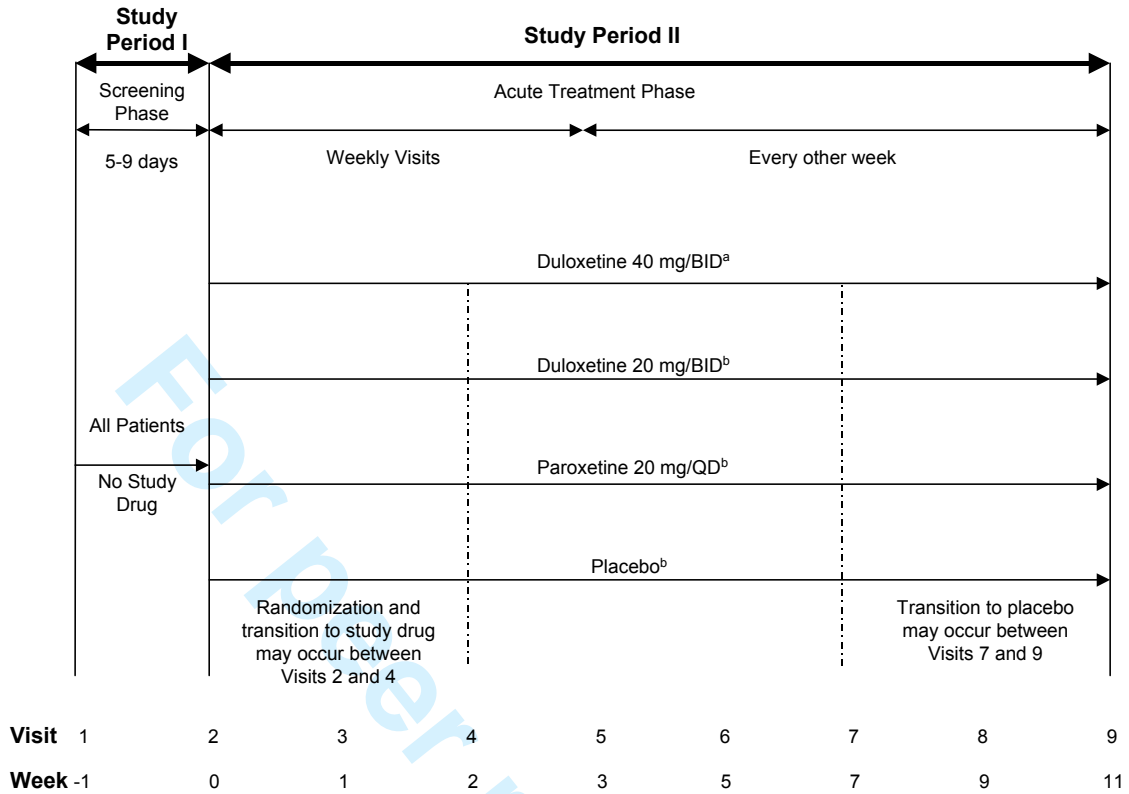

Figure HMAT.1. Illustration of study design for Protocol F1J-MC-HMAT.

Duloxetine Hydrochloride  
Copyright © 2004 Eli Lilly and Company. All rights reserved.

Approved by Lilly 16 November 2004

**Table HMA1b.1. Patient Characteristics at Baseline  
All Randomized Patients**

| Variable                     | PLACEBO<br>(N=89) | DLX20BID<br>(N=86) | DLX40BID<br>(N=91) | PRX20QD<br>(N=87) | Total<br>(N=353) | p-Value |
|------------------------------|-------------------|--------------------|--------------------|-------------------|------------------|---------|
| <b>AGE: YRS</b>              |                   |                    |                    |                   |                  |         |
| No. Patients                 | 89                | 86                 | 91                 | 87                | 353              | .949**  |
| Mean                         | 40.14             | 40.69              | 40.89              | 40.25             | 40.50            |         |
| Median                       | 41.28             | 40.05              | 40.83              | 39.25             | 40.29            |         |
| Standard Dev.                | 12.94             | 10.04              | 11.90              | 11.02             | 11.50            |         |
| Minimum                      | 20.07             | 20.56              | 18.20              | 19.18             | 18.20            |         |
| Maximum                      | 78.21             | 70.60              | 68.87              | 64.02             | 78.21            |         |
| <b>HEIGHT: CM (Visit: 1)</b> |                   |                    |                    |                   |                  |         |
| No. Patients                 | 89                | 85                 | 91                 | 87                | 352              | .556**  |
| Mean                         | 170.84            | 170.66             | 169.45             | 169.19            | 170.03           |         |
| Median                       | 170.18            | 167.64             | 167.64             | 170.18            | 167.64           |         |
| Standard Dev.                | 9.69              | 9.66               | 10.72              | 9.79              | 9.97             |         |
| Minimum                      | 152.40            | 152.40             | 139.70             | 149.86            | 139.70           |         |
| Maximum                      | 198.12            | 200.66             | 195.58             | 193.04            | 200.66           |         |
| Unspecified                  | 0                 | 1                  | 0                  | 0                 | 1                |         |
| <b>WEIGHT: KG (Visit: 1)</b> |                   |                    |                    |                   |                  |         |
| No. Patients                 | 88                | 86                 | 90                 | 87                | 351              | .071**  |
| Mean                         | 80.22             | 81.61              | 82.19              | 88.75             | 83.18            |         |
| Median                       | 77.86             | 78.09              | 81.95              | 79.00             | 79.00            |         |
| Standard Dev.                | 18.93             | 20.33              | 20.87              | 28.97             | 22.74            |         |
| Minimum                      | 45.40             | 51.76              | 43.58              | 45.40             | 43.58            |         |
| Maximum                      | 153.91            | 165.26             | 155.72             | 194.31            | 194.31           |         |
| Unspecified                  | 1                 | 0                  | 1                  | 0                 | 2                |         |

1  
2  
3  
4  
5  
6  
7  
8  
9  
10  
11  
12  
13  
14  
15  
16  
17  
18  
19  
20  
21  
22  
23  
24  
25  
26  
27  
28  
29  
30  
31  
32  
33  
34  
35  
36  
37  
38  
39  
40  
41  
42  
43  
44  
45  
46  
47  
48  
49

Duloxetine Hydrochloride  
Copyright © 2004 Eli Lilly and Company. All rights reserved.

Approved by Lilly 16 November 2004

**Table HMA**T**b.1. Patient Characteristics at Baseline  
All Randomized Patients (concluded)**

| Variable               | PLACEBO<br>(N=89) | DLX20BID<br>(N=86) | DLX40BID<br>(N=91) | PRX20QD<br>(N=87) | Total<br>(N=353) | p-Value |
|------------------------|-------------------|--------------------|--------------------|-------------------|------------------|---------|
| <b>ORIGIN: NO. (%)</b> |                   |                    |                    |                   |                  |         |
| No. Patients           | 89                | 86                 | 91                 | 87                | 353              | .270*   |
| African Descent        | 8 (9.0)           | 4 (4.7)            | 5 (5.5)            | 9 (10.3)          | 26 (7.4)         |         |
| Western Asian          | 0                 | 0                  | 0                  | 2 (2.3)           | 2 (0.6)          |         |
| Caucasian              | 74 (83.1)         | 72 (83.7)          | 77 (84.6)          | 64 (73.6)         | 287 (81.3)       |         |
| East/Southeast A       | 1 (1.1)           | 0                  | 0                  | 0                 | 1 (0.3)          |         |
| Hispanic               | 6 (6.7)           | 9 (10.5)           | 9 (9.9)            | 12 (13.8)         | 36 (10.2)        |         |
| Other                  | 0                 | 1 (1.2)            | 0                  | 0                 | 1 (0.3)          |         |
| <b>GENDER: NO. (%)</b> |                   |                    |                    |                   |                  |         |
| No. Patients           | 89                | 86                 | 91                 | 87                | 353              | .633*   |
| Female                 | 57 (64.0)         | 48 (55.8)          | 56 (61.5)          | 56 (64.4)         | 217 (61.5)       |         |
| Male                   | 32 (36.0)         | 38 (44.2)          | 35 (38.5)          | 31 (35.6)         | 136 (38.5)       |         |

Output stored as RMP.F1JO.HMAT.FINALB(DE128006)  
Data from RMP.SAS.F1JM.MCHMATSW.STUDYB  
\* Frequencies are analyzed using a Chi-Square test.  
\*\* Means are analyzed using a Type III Sum of Squares analysis of variance  
(ANOVA): PROC GLM model=investigator and treatment.  
XDES0001



Duloxetine Hydrochloride  
Copyright © 2004 Eli Lilly and Company. All rights reserved.

Approved by Lilly 16 November 2004

**Table HMA**T**b.2. Summary of Efficacy and Health Outcome Measures**  
**Mean Change from Baseline to Endpoint/Last Observation**  
**All Randomized Patients**  
**Acute Therapy Phase F1J-MC-HMATb**

| Variable                                  | Treatment Group |              |                           |              | p-Value             |                     |                     |
|-------------------------------------------|-----------------|--------------|---------------------------|--------------|---------------------|---------------------|---------------------|
|                                           | Placebo         | Dulox 20 BID | Dulox 40 BID              | Parox 20 QD  | Dulox 20 vs placebo | Dulox 40 vs placebo | Parox 20 vs placebo |
| <b>HAMD<sub>17</sub> Total Score</b>      | n=88            | n=84         | n=86                      | n=84         |                     |                     |                     |
| Mean Baseline (SD)                        | 17.19 (5.11)    | 18.63 (5.85) | 18.06 (4.52)              | 17.65 (5.13) |                     |                     |                     |
| Mean Change (SD)                          | -4.16 (6.42)    | -7.17 (7.97) | -7.72 (7.67)              | -6.06 (8.12) | p=.022              | p=.003              | p=.150              |
| LS Mean Change (SE)                       | -4.99 (0.81)    | -7.42 (0.80) | -8.61 (0.81) <sup>a</sup> | -6.22 (0.82) | p=.034              | p=.002              | p=.285              |
| <b>HAMD<sub>17</sub> Response Rate</b>    | n=88            | n=84         | n=86                      | n=84         |                     |                     |                     |
| Responders n (%)                          | 27 (31%)        | 37 (44%)     | 44 (51%)                  | 34 (40%)     | .083                | .009                | .204                |
| <b>HAMD<sub>17</sub> Remission Rate</b>   | n=88            | n=84         | n=86                      | n=84         |                     |                     |                     |
| Remitters n (%)                           | 26 (30%)        | 29 (35%)     | 43 (50%)                  | 31 (37%)     | .516                | .008                | .334                |
| <b>HAMD<sub>17</sub> Subscale – Core</b>  | n=88            | n=84         | n=86                      | n=84         |                     |                     |                     |
| Mean Baseline (SD)                        | 7.43 (2.64)     | 8.05 (2.53)  | 7.36 (2.14)               | 7.65 (2.43)  |                     |                     |                     |
| Mean Change (SD)                          | -2.02 (3.39)    | -3.37 (3.53) | -3.40 (3.14)              | -3.00 (3.87) | p=.023              | p=.008              | p=.110              |
| LS Mean Change (SE)                       | -2.64 (0.39)    | -3.66 (0.38) | -4.00 (0.39)              | -3.24 (0.39) | p=.060              | p=.013              | p=.271              |
| <b>HAMD<sub>17</sub> Subscale – Maier</b> | n=88            | n=84         | n=86                      | n=84         |                     |                     |                     |
| Mean Baseline (SD)                        | 9.26 (3.00)     | 9.88 (3.01)  | 9.47 (2.28)               | 9.33 (2.64)  |                     |                     |                     |
| Mean Change (SD)                          | -2.53 (3.56)    | -4.04 (4.25) | -4.30 (3.90)              | -3.75 (4.33) | p=.028              | p=.004              | p=.057              |
| LS Mean Change (SE)                       | -3.06 (0.44)    | -4.18 (0.43) | -4.79 (0.44)              | -4.03 (0.44) | p=.068              | p=.005              | p=.115              |

1  
2  
3  
4  
5  
6  
7  
8  
9  
10  
11  
12  
13  
14  
15  
16  
17  
18  
19  
20  
21  
22  
23  
24  
25  
26  
27  
28  
29  
30  
31  
32  
33  
34  
35  
36  
37  
38  
39  
40  
41  
42  
43  
44  
45  
46  
47  
48  
49

Duloxetine Hydrochloride  
Copyright © 2004 Eli Lilly and Company. All rights reserved.

Approved by Lilly 16 November 2004

**Table HMATb.2. Summary of Efficacy and Health Outcome Measures**  
**Mean Change from Baseline to Endpoint/Last Observation**  
**All Randomized Patients**  
**Acute Therapy Phase F1J-MC-HMATb (continued)**

| Variable                                                     | Treatment Group |              |                           |              | p-Value             |                     |                     |
|--------------------------------------------------------------|-----------------|--------------|---------------------------|--------------|---------------------|---------------------|---------------------|
|                                                              | Placebo         | Dulox 20 BID | Dulox 40 BID              | Parox 20 QD  | Dulox 20 vs placebo | Dulox 40 vs placebo | Parox 20 vs placebo |
| <b>HAMD<sub>17</sub> Subscale – Anxiety/Somatization</b>     | n=88            | n=84         | n=86                      | n=84         |                     |                     |                     |
| Mean Baseline (SD)                                           | 5.48 (2.12)     | 6.04 (2.52)  | 6.07 (1.82)               | 5.85 (2.41)  |                     |                     |                     |
| Mean Change (SD)                                             | -1.06 (2.49)    | -2.17 (3.08) | -2.79 (2.72)              | -2.13 (3.23) | p=.046              | p=<.001             | p=.040              |
| LS Mean Change (SE)                                          | -1.38 (0.29)    | -2.11 (0.28) | -2.92 (0.28) <sup>a</sup> | -2.11 (0.29) | p=.066              | p=<.001             | p=.069              |
| <b>HAMD<sub>17</sub> Subscale – Retardation/Somatization</b> | n=88            | n=84         | n=86                      | n=84         |                     |                     |                     |
| Mean Baseline (SD)                                           | 6.38 (1.97)     | 6.96 (2.11)  | 6.34 (1.75)               | 6.81 (1.95)  |                     |                     |                     |
| Mean Change (SD)                                             | -1.80 (2.84)    | -2.80 (3.03) | -2.63 (2.80)              | -2.45 (3.15) | p=.047              | p=.053              | p=.263              |
| LS Mean Change (SE)                                          | -2.32 (0.32)    | -3.08 (0.32) | -3.22 (0.32)              | -2.59 (0.33) | p=.092              | p=.046              | p=.546              |
| <b>HAMD<sub>17</sub> Subscale – Sleep</b>                    | n=88            | n=84         | n=86                      | n=84         |                     |                     |                     |
| Mean Baseline (SD)                                           | 2.67 (1.87)     | 2.76 (1.86)  | 2.85 (1.82)               | 2.54 (1.85)  |                     |                     |                     |
| Mean Change (SD)                                             | -0.81 (1.91)    | -1.05 (2.04) | -1.02 (2.29)              | -0.69 (2.16) | p=.485              | p=.769              | p=.827              |
| LS Mean Change (SE)                                          | -0.84 (0.21)    | -1.04 (0.20) | -1.14 (0.21)              | -0.65 (0.21) | p=.483              | p=.303              | p=.503              |

Duloxetine Hydrochloride  
Copyright © 2004 Eli Lilly and Company. All rights reserved.

Approved by Lilly 16 November 2004

**Table HMATb.2. Summary of Efficacy and Health Outcome Measures**  
**Mean Change from Baseline to Endpoint/Last Observation**  
**All Randomized Patients**  
**Acute Therapy Phase F1J-MC-HMATb (continued)**

| Variable                               | Treatment Group |               |               |               | p-Value             |                     |                     |
|----------------------------------------|-----------------|---------------|---------------|---------------|---------------------|---------------------|---------------------|
|                                        | Placebo         | Dulox 20 BID  | Dulox 40 BID  | Parox 20 QD   | Dulox 20 vs placebo | Dulox 40 vs placebo | Parox 20 vs placebo |
| <b>HAMD<sub>17</sub> Item #1 Score</b> | n=88            | n=84          | n=86          | n=84          |                     |                     |                     |
| Mean Baseline (SD)                     | 2.32 (0.89)     | 2.52 (0.80)   | 2.24 (0.77)   | 2.37 (0.79)   |                     |                     |                     |
| Mean Change (SD)                       | -0.67 (1.24)    | -1.08 (1.19)  | -0.95 (1.02)  | -0.96 (1.31)  | p=.054              | p=.065              | p=.122              |
| LS Mean Change (SE)                    | -0.89 (0.13)    | -1.15 (0.13)  | -1.16 (0.13)  | -1.11 (0.13)  | p=.174              | p=.152              | p=.255              |
| <b>MADRS</b>                           | n=88            | n=84          | n=86          | n=84          |                     |                     |                     |
| Mean Baseline (SD)                     | 22.72 (8.00)    | 24.44 (8.05)  | 22.58 (6.21)  | 23.07 (7.51)  |                     |                     |                     |
| Mean Change (SD)                       | -5.75 (9.19)    | -9.11 (11.50) | -8.99 (10.08) | -8.51 (11.91) | p=.082              | p=.029              | p=.105              |
| LS Mean Change (SE)                    | -7.43 (1.15)    | -9.37 (1.14)  | -10.73 (1.16) | -9.01 (1.17)  | p=.227              | p=.042              | p=.331              |
| <b>CGI-Severity</b>                    | n=88            | n=84          | n=87          | n=85          |                     |                     |                     |
| Mean Baseline (SD)                     | 4.11 (0.73)     | 4.19 (0.80)   | 4.10 (0.51)   | 4.02 (0.62)   |                     |                     |                     |
| Mean Change (SD)                       | -0.88 (1.21)    | -1.19 (1.38)  | -1.20 (1.26)  | -1.06 (1.39)  | p=.135              | p=.078              | p=.262              |
| LS Mean Change (SE)                    | -1.10 (0.15)    | -1.36 (0.15)  | -1.42 (0.16)  | -1.25 (0.16)  | p=.242              | p=.153              | p=.507              |

Duloxetine Hydrochloride  
Copyright © 2004 Eli Lilly and Company. All rights reserved.

Approved by Lilly 16 November 2004

**Table HMATb.2. Summary of Efficacy and Health Outcome Measures**  
**Mean Change from Baseline to Endpoint/Last Observation**  
**All Randomized Patients**  
**Acute Therapy Phase F1J-MC-HMATb (concluded)**

| Variable               | Treatment Group |              |               |               | p-Value             |                     |                     |
|------------------------|-----------------|--------------|---------------|---------------|---------------------|---------------------|---------------------|
|                        | Placebo         | Dulox 20 BID | Dulox 40 BID  | Parox 20 QD   | Dulox 20 vs placebo | Dulox 40 vs placebo | Parox 20 vs placebo |
| <b>PGI-Improvement</b> | n=88            | n=84         | n=86          | n=85          |                     |                     |                     |
| Mean Baseline (SD)     | n/a             | n/a          | n/a           | n/a           |                     |                     |                     |
| Endpoint Mean (SD)     | 3.24 (1.41)     | 2.93 (1.31)  | 2.86 (1.47)   | 2.99 (1.44)   | p=.162              | p=.079              | p=.253              |
| Endpoint LS Mean (SE)  | 2.87 (0.15)     | 2.74 (0.15)  | 2.52 (0.15)   | 2.80 (0.15)   | p=.522              | p=.093              | p=.743              |
| <b>HAMA</b>            | n=88            | n=84         | n=86          | n=84          |                     |                     |                     |
| Mean Baseline (SD)     | 14.48 (5.33)    | 15.25 (5.86) | 14.88 (4.87)  | 14.49 (5.76)  |                     |                     |                     |
| Mean Change (SD)       | -3.49 (5.32)    | -5.13 (6.74) | -5.86 (7.14)  | -4.60 (7.36)  | p=.149              | p=.019              | p=.257              |
| LS Mean Change (SE)    | -4.33 (0.69)    | -5.45 (0.68) | -6.57 (0.69)  | -5.23 (0.69)  | p=.238              | p=.020              | p=.349              |
| <b>QLDS</b>            | n=80            | n=76         | n=78          | n=72          |                     |                     |                     |
| Mean Baseline (SD)     | 15.21 (7.32)    | 19.92 (7.37) | 17.22 (7.67)  | 17.60 (8.49)  |                     |                     |                     |
| Mean Change (SD)       | -4.30 (8.21)    | -9.29 (8.61) | -8.55 (9.39)  | -7.96 (10.26) | p=.069              | p=.023              | p=.084              |
| LS Mean Change (SE)    | -7.87 (1.07)    | -8.90 (1.04) | -10.76 (1.05) | -9.85 (1.04)  | p=.483              | p=.050              | p=.178              |

Abbreviations: CGI-Severity = Clinical Global Impressions of Severity; HAMA = Hamilton Anxiety Rating Scale; HAMD<sub>17</sub> = 17-Item Hamilton Depression Rating Scale; MADRS = Montgomery and Asberg Depression Rating Scale; PGI-Improvement = Patient's Global Impressions of Improvement; Dulox 20 BID = duloxetine 20 mg twice daily; Dulox 40 BID = duloxetine 40 mg twice daily; Parox 20 QD = paroxetine 20 mg once daily; QLDS = Quality of Life in Depression Scale; SD = standard deviation; SE = standard error.

Note: n = the number of patients who had a baseline score and at least one nonmissing postbaseline score for that particular variable

Note: "n/a" in Global Impressions of Improvement scales indicates that a baseline score is not collected in this type of scale

Note: Mean Change – Data from mean change analysis

Note: LS Mean Change – Data from repeated measures analysis

<sup>a</sup> Result was statistically significant (p<.05) compared with paroxetine 20 mg QD

Duloxetine Hydrochloride  
Copyright © 2004 Eli Lilly and Company. All rights reserved.

Approved by Lilly 16 November 2004

**Table HMATb.3. Summary of Somatic and Pain Measures**  
**Mean Change from Baseline to Endpoint/Last Observation**  
**All Randomized Patients**  
**Acute Therapy Phase F1J-MC-HMATb**

| Variable                            | Treatment Group |               |                |               | p-Value             |                     |                     |
|-------------------------------------|-----------------|---------------|----------------|---------------|---------------------|---------------------|---------------------|
|                                     | Placebo         | Dulox 20 BID  | Dulox 40 BID   | Parox 20 QD   | Dulox 20 vs placebo | Dulox 40 vs placebo | Parox 20 vs placebo |
| <b>SSI 26-Item Average</b>          | n=88            | n=82          | n=86           | n=85          |                     |                     |                     |
| Mean Baseline (SD)                  | 1.68 (0.55)     | 1.71 (0.51)   | 1.71 (0.55)    | 1.71 (0.47)   |                     |                     |                     |
| Mean Change (SD)                    | -0.13 (0.47)    | -0.13 (0.35)  | -0.17 (0.46)   | -0.17 (0.47)  | p=.700              | p=.875              | p=.732              |
| LS Mean Change (SE)                 | -0.18 (0.05)    | -0.15 (0.05)  | -0.22 (0.05)   | -0.22 (0.05)  | p=.620              | p=.621              | p=.540              |
| <b>SSI 28-Item Average</b>          | n=88            | n=82          | n=86           | n=85          |                     |                     |                     |
| Mean Baseline (SD)                  | 1.69 (0.56)     | 1.72 (0.51)   | 1.74 (0.57)    | 1.72 (0.49)   |                     |                     |                     |
| Mean Change (SD)                    | -0.13 (0.47)    | -0.13 (0.35)  | -0.19 (0.46)   | -0.17 (0.47)  | p=.703              | p=.640              | p=.740              |
| LS Mean Change (SE)                 | -0.18 (0.05)    | -0.15 (0.05)  | -0.24 (0.05)   | -0.22 (0.05)  | p=.636              | p=.409              | p=.581              |
| <b>VAS-Severity of Overall Pain</b> | n=88            | n=84          | n=86           | n=85          |                     |                     |                     |
| Mean Baseline (SD)                  | 24.18 (25.99)   | 27.02 (25.39) | 25.55 (22.83)  | 22.22 (22.48) |                     |                     |                     |
| Mean Change (SD)                    | -3.20 (27.17)   | -6.44 (23.30) | -10.34 (22.52) | -8.06 (20.26) | p=.710              | p=.048              | p=.071              |
| LS Mean Change (SE)                 | -4.09 (2.49)    | -5.08 (2.42)  | -11.44 (2.49)  | -9.63 (2.51)  | p=.771              | p=.035              | p=.113              |

Duloxetine Hydrochloride  
Copyright © 2004 Eli Lilly and Company. All rights reserved.

Approved by Lilly 16 November 2004

**Table HMATb.3. Summary of Somatic and Pain Measures**  
**Mean Change from Baseline to Endpoint/Last Observation**  
**All Randomized Patients**  
**Acute Therapy Phase F1J-MC-HMATb (continued)**

| Variable                             | Treatment Group |               |               |               | p-Value             |                     |                     |
|--------------------------------------|-----------------|---------------|---------------|---------------|---------------------|---------------------|---------------------|
|                                      | Placebo         | Dulox 20 BID  | Dulox 40 BID  | Parox 20 QD   | Dulox 20 vs placebo | Dulox 40 vs placebo | Parox 20 vs placebo |
| <b>VAS-Severity of Headaches</b>     | n=88            | n=84          | n=86          | n=84          |                     |                     |                     |
| Mean Baseline (SD)                   | 23.68 (28.58)   | 20.63 (23.70) | 22.42 (23.30) | 16.05 (20.63) |                     |                     |                     |
| Mean Change (SD)                     | -6.17 (25.39)   | -3.36 (22.70) | -7.99 (24.03) | -3.40 (23.08) | p=.677              | p=.470              | p=.603              |
| LS Mean Change (SE)                  | -6.25 (2.30)    | -5.56 (2.23)  | -7.90 (2.30)  | -6.83 (2.32)  | p=.828              | p=.607              | p=.859              |
| <b>VAS-Severity of Back Pain</b>     | n=88            | n=84          | n=86          | n=85          |                     |                     |                     |
| Mean Baseline (SD)                   | 17.23 (22.76)   | 22.31 (26.11) | 20.19 (24.61) | 15.87 (18.07) |                     |                     |                     |
| Mean Change (SD)                     | -1.19 (25.30)   | -6.88 (21.83) | -8.31 (24.05) | -3.36 (20.01) | p=.414              | p=.094              | p=.387              |
| LS Mean Change (SE)                  | -2.48 (2.41)    | -5.06 (2.35)  | -7.67 (2.41)  | -4.19 (2.43)  | p=.439              | p=.124              | p=.612              |
| <b>VAS-Severity of Shoulder Pain</b> | n=88            | n=84          | n=86          | n=84          |                     |                     |                     |
| Mean Baseline (SD)                   | 14.64 (23.56)   | 12.65 (19.58) | 15.98 (22.24) | 13.68 (22.73) |                     |                     |                     |
| Mean Change (SD)                     | -2.40 (20.09)   | -2.07 (19.53) | -7.97 (21.61) | -2.71 (22.95) | p=.899              | p=.081              | p=.907              |
| LS Mean Change (SE)                  | -2.34 (2.26)    | -2.98 (2.19)  | -5.67 (2.26)  | -0.82 (2.26)  | p=.837              | p=.292              | p=.631              |

Duloxetine Hydrochloride  
Copyright © 2004 Eli Lilly and Company. All rights reserved.

Approved by Lilly 16 November 2004

**Table HMA**T**b.3. Summary of Somatic and Pain Measures**  
**Mean Change from Baseline to Endpoint/Last Observation**  
**All Randomized Patients**  
**Acute Therapy Phase F1J-MC-HMATb (concluded)**

| Variable                                      | Treatment Group |               |                |               | p-Value             |                     |                     |
|-----------------------------------------------|-----------------|---------------|----------------|---------------|---------------------|---------------------|---------------------|
|                                               | Placebo         | Dulox 20 BID  | Dulox 40 BID   | Parox 20 QD   | Dulox 20 vs placebo | Dulox 40 vs placebo | Parox 20 vs placebo |
| <b>VAS-Interference with Daily Activities</b> | n=88            | n=84          | n=86           | n=85          |                     |                     |                     |
| Mean Baseline (SD)                            | 17.14 (25.42)   | 19.52 (24.66) | 17.00 (21.00)  | 15.62 (20.91) |                     |                     |                     |
| Mean Change (SD)                              | -3.38 (26.49)   | -1.94 (26.44) | -4.90 (25.39)  | -3.29 (20.77) | p=.261              | p=.687              | p=.915              |
| LS Mean Change (SE)                           | -4.31 (2.53)    | -0.57 (2.45)  | -6.79 (2.52)   | -4.24 (2.53)  | p=.281              | p=.482              | p=.983              |
| <b>VAS-Pain While Awake</b>                   | n=88            | n=84          | n=86           | n=84          |                     |                     |                     |
| Mean Baseline (SD)                            | 25.73 (28.05)   | 34.93 (32.52) | 29.23 (27.28)  | 28.30 (30.51) |                     |                     |                     |
| Mean Change (SD)                              | -1.95 (30.33)   | -8.18 (31.49) | -10.99 (32.23) | -8.10 (32.52) | p=.787              | p=.078              | p=.269              |
| LS Mean Change (SE)                           | -2.43 (3.32)    | -2.70 (3.23)  | -11.36 (3.31)  | -6.02 (3.33)  | p=.952              | p=.055              | p=.440              |

Abbreviations: Dulox 20 BID = duloxetine 20 mg twice daily; Dulox 40 BID = duloxetine 40 mg twice daily; Parox 20 QD = paroxetine 20 mg once daily; SSI = Somatic Symptom Inventory; VAS = Visual Analog Scales

Note: n = the number of patients who had a baseline score and at least one nonmissing postbaseline score for that particular variable

Note: Mean Change – Data from mean change analysis

Note: LS Mean Change – Data from repeated measures analysis

Duloxetine Hydrochloride  
Copyright © 2004 Eli Lilly and Company. All rights reserved.

Approved by Lilly 16 November 2004

**Table HMATb.4. Treatment-Emergent Adverse Events with Incidence Greater than or Equal to 2 Percent  
All Randomized Patients  
Acute Therapy Phase**

|                         | PLACEBO       | DLX20BID      | DLX40BID      | PRX20QD       | Total          | -----p-Values*----- |       |       |      |      |      |      |
|-------------------------|---------------|---------------|---------------|---------------|----------------|---------------------|-------|-------|------|------|------|------|
|                         | N=89<br>n (%) | N=86<br>n (%) | N=91<br>n (%) | N=87<br>n (%) | N=353<br>n (%) | Overall             | 1vs2  | 1vs3  | 1vs4 | 2vs3 | 2vs4 | 3vs4 |
| PATIENTS WITH >= 1 TESS | 61 (68.5)     | 73 (84.9)     | 76 (83.5)     | 76 (87.4)     | 286 (81.0)     | .009                | .013  | .023  | .003 | .839 | .666 | .528 |
| NAUSEA                  | 2 ( 2.2)      | 19 (22.1)     | 23 (25.3)     | 14 (16.1)     | 58 (16.4)      | <.001               | <.001 | <.001 | .001 | .724 | .339 | .143 |
| HEADACHE                | 10 (11.2)     | 12 (14.0)     | 17 (18.7)     | 10 (11.5)     | 49 (13.9)      | .470                | .652  | .211  | 1.00 | .423 | .655 | .213 |
| INSOMNIA                | 5 ( 5.6)      | 15 (17.4)     | 18 (19.8)     | 7 ( 8.0)      | 45 (12.7)      | .008                | .017  | .006  | .564 | .705 | .072 | .031 |
| RHINITIS                | 15 (16.9)     | 7 ( 8.1)      | 5 ( 5.5)      | 7 ( 8.0)      | 34 ( 9.6)      | .075                | .110  | .018  | .110 | .558 | 1.00 | .560 |
| SOMNOLENCE              | 2 ( 2.2)      | 15 (17.4)     | 10 (11.0)     | 7 ( 8.0)      | 34 ( 9.6)      | .005                | <.001 | .033  | .098 | .281 | .072 | .613 |
| DIZZINESS               | 5 ( 5.6)      | 4 ( 4.7)      | 15 (16.5)     | 9 (10.3)      | 33 ( 9.3)      | .032                | 1.00  | .031  | .278 | .014 | .248 | .276 |
| DRY MOUTH               | 3 ( 3.4)      | 9 (10.5)      | 14 (15.4)     | 7 ( 8.0)      | 33 ( 9.3)      | .042                | .077  | .009  | .209 | .377 | .611 | .165 |
| DIARRHEA                | 7 ( 7.9)      | 7 ( 8.1)      | 8 ( 8.8)      | 10 (11.5)     | 32 ( 9.1)      | .851                | 1.00  | 1.00  | .454 | 1.00 | .611 | .624 |
| CONSTIPATION            | 3 ( 3.4)      | 7 ( 8.1)      | 8 ( 8.8)      | 12 (13.8)     | 30 ( 8.5)      | .095                | .207  | .212  | .015 | 1.00 | .331 | .346 |
| PAIN                    | 10 (11.2)     | 6 ( 7.0)      | 3 ( 3.3)      | 6 ( 6.9)      | 25 ( 7.1)      | .230                | .434  | .047  | .433 | .319 | 1.00 | .322 |
| SWEATING                | 0 ( 0.0)      | 8 ( 9.3)      | 11 (12.1)     | 6 ( 6.9)      | 25 ( 7.1)      | .003                | .003  | <.001 | .013 | .631 | .590 | .310 |
| ASTHENIA                | 2 ( 2.2)      | 8 ( 9.3)      | 9 ( 9.9)      | 4 ( 4.6)      | 23 ( 6.5)      | .102                | .055  | .058  | .441 | 1.00 | .248 | .250 |
| DYSPEPSIA               | 6 ( 6.7)      | 3 ( 3.5)      | 6 ( 6.6)      | 6 ( 6.9)      | 21 ( 5.9)      | .743                | .497  | 1.00  | 1.00 | .498 | .496 | 1.00 |
| BACK PAIN               | 6 ( 6.7)      | 7 ( 8.1)      | 3 ( 3.3)      | 3 ( 3.4)      | 19 ( 5.4)      | .408                | .779  | .327  | .497 | .202 | .211 | 1.00 |
| ANOREXIA                | 1 ( 1.1)      | 4 ( 4.7)      | 10 (11.0)     | 3 ( 3.4)      | 18 ( 5.1)      | .028                | .205  | .009  | .365 | .164 | .720 | .082 |
| VASODILATATION          | 2 ( 2.2)      | 7 ( 8.1)      | 6 ( 6.6)      | 2 ( 2.3)      | 17 ( 4.8)      | .158                | .096  | .278  | 1.00 | .778 | .099 | .279 |
| ABDOMINAL PAIN          | 2 ( 2.2)      | 6 ( 7.0)      | 4 ( 4.4)      | 3 ( 3.4)      | 15 ( 4.2)      | .457                | .164  | .682  | .680 | .527 | .329 | 1.00 |
| COUGH INCREASED         | 5 ( 5.6)      | 3 ( 3.5)      | 3 ( 3.3)      | 4 ( 4.6)      | 15 ( 4.2)      | .886                | .720  | .494  | 1.00 | 1.00 | 1.00 | .716 |
| LIBIDO DECREASED        | 1 ( 1.1)      | 4 ( 4.7)      | 7 ( 7.7)      | 3 ( 3.4)      | 15 ( 4.2)      | .163                | .205  | .064  | .365 | .537 | .720 | .331 |
| VOMITING                | 1 ( 1.1)      | 6 ( 7.0)      | 5 ( 5.5)      | 3 ( 3.4)      | 15 ( 4.2)      | .203                | .061  | .211  | .365 | .762 | .329 | .721 |
| MYALGIA                 | 4 ( 4.5)      | 4 ( 4.7)      | 3 ( 3.3)      | 3 ( 3.4)      | 14 ( 4.0)      | .933                | 1.00  | .719  | 1.00 | .714 | .720 | 1.00 |
| NERVOUSNESS             | 2 ( 2.2)      | 4 ( 4.7)      | 5 ( 5.5)      | 1 ( 1.1)      | 12 ( 3.4)      | .355                | .438  | .444  | 1.00 | 1.00 | .211 | .211 |
| AMBLYOPIA               | 1 ( 1.1)      | 1 ( 1.2)      | 6 ( 6.6)      | 3 ( 3.4)      | 11 ( 3.1)      | .159                | 1.00  | .118  | .365 | .119 | .621 | .497 |
| ANORGASMIA              | 0 ( 0.0)      | 4 ( 4.7)      | 4 ( 4.4)      | 3 ( 3.4)      | 11 ( 3.1)      | .174                | .056  | .121  | .119 | 1.00 | .720 | 1.00 |
| ANXIETY                 | 0 ( 0.0)      | 4 ( 4.7)      | 3 ( 3.3)      | 4 ( 4.6)      | 11 ( 3.1)      | .172                | .056  | .246  | .058 | .714 | 1.00 | .716 |
| PARESTHESIA             | 4 ( 4.5)      | 1 ( 1.2)      | 2 ( 2.2)      | 4 ( 4.6)      | 11 ( 3.1)      | .485                | .368  | .441  | 1.00 | 1.00 | .368 | .436 |
| ACCIDENTAL INJURY       | 0 ( 0.0)      | 5 ( 5.8)      | 2 ( 2.2)      | 3 ( 3.4)      | 10 ( 2.8)      | .091                | .027  | .497  | .119 | .268 | .496 | .677 |
| PHARYNGITIS             | 5 ( 5.6)      | 2 ( 2.3)      | 1 ( 1.1)      | 2 ( 2.3)      | 10 ( 2.8)      | .380                | .444  | .116  | .444 | .612 | 1.00 | .615 |
| ABNORMAL DREAMS         | 0 ( 0.0)      | 2 ( 2.3)      | 2 ( 2.2)      | 5 ( 5.7)      | 9 ( 2.5)       | .119                | .240  | .497  | .028 | 1.00 | .443 | .270 |

(1) = PLACEBO, (2) = DLX20BID, (3) = DLX40BID, (4) = PRX20QD

\*p-Values are from Fisher's Exact test.



Duloxetine Hydrochloride  
 Copyright © 2004 Eli Lilly and Company. All rights reserved.

Approved by Lilly 16 November 2004

**Table HMA**T**.4. Treatment-Emergent Adverse Events with Incidence Greater than or Equal to 2 Percent  
 All Randomized Patients  
 Acute Therapy Phase (concluded)**

|                      | PLACEBO<br>N=89<br>n (%) | DLX20BID<br>N=86<br>n (%) | DLX40BID<br>N=91<br>n (%) | PRX20QD<br>N=87<br>n (%) | Total<br>N=353<br>n (%) | -----p-Values*----- |      |      |      |      |      |      |
|----------------------|--------------------------|---------------------------|---------------------------|--------------------------|-------------------------|---------------------|------|------|------|------|------|------|
|                      |                          |                           |                           |                          |                         | Overall             | 1vs2 | 1vs3 | 1vs4 | 2vs3 | 2vs4 | 3vs4 |
| ABNORMAL EJACULATION | 1 ( 1.1)                 | 2 ( 2.3)                  | 2 ( 2.2)                  | 4 ( 4.6)                 | 9 ( 2.5)                | .539                | .616 | 1.00 | .208 | 1.00 | .682 | .436 |
| IMPOTENCE            | 0 ( 0.0)                 | 4 ( 4.7)                  | 2 ( 2.2)                  | 3 ( 3.4)                 | 9 ( 2.5)                | .165                | .056 | .497 | .119 | .434 | .720 | .677 |
| TREMOR               | 1 ( 1.1)                 | 3 ( 3.5)                  | 2 ( 2.2)                  | 3 ( 3.4)                 | 9 ( 2.5)                | .682                | .362 | 1.00 | .365 | .675 | 1.00 | .677 |
| FLATULENCE           | 1 ( 1.1)                 | 2 ( 2.3)                  | 1 ( 1.1)                  | 4 ( 4.6)                 | 8 ( 2.3)                | .424                | .616 | 1.00 | .208 | .612 | .682 | .203 |
| PALPITATION          | 2 ( 2.2)                 | 2 ( 2.3)                  | 2 ( 2.2)                  | 2 ( 2.3)                 | 8 ( 2.3)                | 1.000               | 1.00 | 1.00 | 1.00 | 1.00 | 1.00 | 1.00 |
| RASH                 | 3 ( 3.4)                 | 1 ( 1.2)                  | 4 ( 4.4)                  | 0 ( 0.0)                 | 8 ( 2.3)                | .195                | .621 | 1.00 | .246 | .369 | .497 | .121 |
| TINNITUS             | 1 ( 1.1)                 | 4 ( 4.7)                  | 2 ( 2.2)                  | 1 ( 1.1)                 | 8 ( 2.3)                | .436                | .205 | 1.00 | 1.00 | .434 | .211 | 1.00 |
| NECK PAIN            | 0 ( 0.0)                 | 4 ( 4.7)                  | 3 ( 3.3)                  | 0 ( 0.0)                 | 7 ( 2.0)                | .031                | .056 | .246 |      | .714 | .059 | .246 |
| PRURITUS             | 2 ( 2.2)                 | 2 ( 2.3)                  | 1 ( 1.1)                  | 2 ( 2.3)                 | 7 ( 2.0)                | .881                | 1.00 | .619 | 1.00 | .612 | 1.00 | .615 |
| THINKING ABNORMAL    | 0 ( 0.0)                 | 1 ( 1.2)                  | 5 ( 5.5)                  | 1 ( 1.1)                 | 7 ( 2.0)                | .067                | .491 | .059 | .494 | .212 | 1.00 | .211 |
| TWITCHING            | 1 ( 1.1)                 | 3 ( 3.5)                  | 2 ( 2.2)                  | 1 ( 1.1)                 | 7 ( 2.0)                | .630                | .362 | 1.00 | 1.00 | .675 | .368 | 1.00 |
| URINARY FREQUENCY    | 0 ( 0.0)                 | 3 ( 3.5)                  | 2 ( 2.2)                  | 2 ( 2.3)                 | 7 ( 2.0)                | .398                | .117 | .497 | .243 | .675 | .682 | 1.00 |

**Table HMATb.5. Laboratory Data - Chemistry Analytes  
Analytes with Statistically Significant Mean Change From  
Baseline to Endpoint Values  
All Randomized Patients  
Acute Therapy Phase**

| Lab Test | Lab Unit | Therapy  | n    | Change to          |                    |          |       | Therapy (Int*1) | Pair-wise*2 |
|----------|----------|----------|------|--------------------|--------------------|----------|-------|-----------------|-------------|
|          |          |          |      | -----Baseline----- | -----Endpoint----- | p-Values |       |                 |             |
|          |          |          | Mean | SD                 | Mean               | SD       |       |                 |             |
| AST      | U/L      | PLACEBO  | 86   | 24.29              | 10.86              | -2.05    | 10.11 | .008            |             |
|          |          | DLX20BID | 81   | 22.68              | 7.44               | 3.17     | 10.60 | (.475)          | .001        |
|          |          | DLX40BID | 81   | 22.67              | 10.21              | 1.25     | 8.03  |                 | .010        |
|          |          | PRX20QD  | 78   | 23.54              | 10.55              | 1.47     | 10.88 |                 | .015        |
| ALT      | U/L      | PLACEBO  | 86   | 27.73              | 20.40              | -3.56    | 13.73 | .002            |             |
|          |          | DLX20BID | 81   | 25.48              | 15.69              | 4.15     | 18.93 | (.480)          | .004        |
|          |          | DLX40BID | 81   | 24.37              | 17.50              | 3.86     | 13.69 |                 | <.001       |
|          |          | PRX20QD  | 78   | 28.51              | 20.92              | -0.53    | 15.77 |                 | .070        |
| CPK      | U/L      | PLACEBO  | 86   | 192.0              | 673.6              | -55.6    | 427.5 | .013            |             |
|          |          | DLX20BID | 81   | 126.6              | 89.0               | 30.9     | 115.1 | (.813)          | .040        |
|          |          | DLX40BID | 81   | 123.8              | 101.5              | -6.7     | 129.3 |                 | .599        |
|          |          | PRX20QD  | 78   | 111.0              | 63.8               | 31.8     | 173.0 |                 | .039        |
| ALKPH    | U/L      | PLACEBO  | 86   | 68.6               | 20.4               | -1.4     | 9.1   | .049            |             |
|          |          | DLX20BID | 81   | 69.7               | 19.5               | 3.9      | 12.8  | (.585)          | .013        |
|          |          | DLX40BID | 81   | 70.1               | 18.2               | 2.4      | 9.2   |                 | .019        |
|          |          | PRX20QD  | 78   | 72.5               | 23.4               | 0.9      | 14.0  |                 | .153        |
| CALC     | mmol/L   | PLACEBO  | 86   | 2.397              | 0.111              | -0.035   | 0.126 | .009            |             |
|          |          | DLX20BID | 81   | 2.379              | 0.112              | -0.006   | 0.148 | (.280)          | .273        |
|          |          | DLX40BID | 81   | 2.398              | 0.120              | -0.003   | 0.144 |                 | .193        |
|          |          | PRX20QD  | 78   | 2.357              | 0.102              | 0.032    | 0.110 |                 | <.001       |
| SODIUM   | mmol/L   | PLACEBO  | 86   | 141.7              | 2.1                | -1.2     | 2.8   | .020            |             |
|          |          | DLX20BID | 81   | 141.5              | 2.2                | -0.4     | 2.9   | (.554)          | .079        |
|          |          | DLX40BID | 81   | 141.5              | 2.7                | -0.2     | 3.3   |                 | .014        |
|          |          | PRX20QD  | 78   | 141.2              | 2.4                | 0.2      | 3.0   |                 | .004        |
| UR AC    | umol/L   | PLACEBO  | 86   | 288.8              | 87.8               | 1.0      | 43.6  | .145            |             |
|          |          | DLX20BID | 81   | 314.4              | 82.8               | -1.0     | 48.8  | (.810)          | .262        |
|          |          | DLX40BID | 81   | 304.9              | 84.1               | -17.1    | 47.8  |                 | .022        |
|          |          | PRX20QD  | 78   | 300.8              | 81.5               | -5.5     | 48.3  |                 | .150        |
| T.BILI   | umol/L   | PLACEBO  | 86   | 6.8                | 6.0                | 0.9      | 2.9   | .016            |             |
|          |          | DLX20BID | 81   | 6.7                | 4.2                | -0.0     | 3.6   | (.808)          | .017        |
|          |          | DLX40BID | 81   | 7.1                | 5.6                | -0.5     | 3.4   |                 | .008        |
|          |          | PRX20QD  | 78   | 6.2                | 3.7                | 0.6      | 2.9   |                 | .591        |

Output stored as RMP.F1JO.HMAT.FINALB(LS604002)

Data from RMP.SAS.F1JM.MCHMATSW.STUDYB

Note: n = Total number of patients in each treatment group having the variable in both baseline and postbaseline visits.

Note: Models:

RDUC1 - \*1 Type III Sums of Squares from an analysis of variance (ANOVA) on the ranks:  
PROC GLM model=investigator and treatment for the overall p-Value and  
model=investigator, treatment, and interaction for the interaction p-Value.

\*2 Least-squares mean option in PROC GLM from the ANOVA on the ranks using the  
mean square for error.

Note: Each investigator has at least one patient in each treatment group.

**Table HMA**T**b.5.      Laboratory Data - Chemistry Analytes  
 Analytes with Statistically Significant Mean Change From  
 Baseline to Endpoint Values  
 All Randomized Patients  
 Acute Therapy Phase**

Legend of Lab Test Code Abbreviations:

| Abbrev. | Description            |
|---------|------------------------|
| AST     | AST/SGOT               |
| ALT     | ALT/SGPT               |
| CPK     | CREATINE PHOSPHOKINASE |
| ALKPH   | ALKALINE PHOSPHATASE   |
| CALC    | CALCIUM                |
| SODIUM  | SODIUM                 |
| UR AC   | URIC ACID              |
| T.BILI  | BILIRUBIN, TOTAL       |

peer review only

1  
2  
3  
4  
5  
6  
7  
8  
9  
10  
11  
12  
13  
14  
15  
16  
17  
18  
19  
20  
21  
22  
23  
24  
25  
26  
27  
28  
29  
30  
31  
32  
33  
34  
35  
36  
37  
38  
39  
40  
41  
42  
43  
44  
45  
46  
47  
48  
49  
50  
51  
52  
53  
54  
55  
56  
57  
58  
59  
60

**Table HMatb.6. Laboratory Data - Nonchemistry Analytes**  
**Analytes with Statistically Significant Mean Change From**  
**Baseline to Endpoint Values**  
**All Randomized Patients**  
**Acute Therapy Phase**

| Lab Test | Lab Unit | Therapy  | n  | Change to |        |         |        | Therapy (Int*1) | Pair-wise*2 | Model |
|----------|----------|----------|----|-----------|--------|---------|--------|-----------------|-------------|-------|
|          |          |          |    | Mean      | SD     | Mean    | SD     |                 |             |       |
| HCT      | l        | PLACEBO  | 79 | 0.4189    | 0.0394 | -0.0090 | 0.0278 | .067            |             | RDUC1 |
|          |          | DLX20BID | 76 | 0.4237    | 0.0364 | 0.0011  | 0.0240 | (.613)          | .019        |       |
|          |          | DLX40BID | 76 | 0.4233    | 0.0350 | -0.0007 | 0.0259 |                 | .067        |       |
|          |          | PRX20QD  | 67 | 0.4201    | 0.0398 | -0.0057 | 0.0263 |                 | .634        |       |
| MCHC     | mml/L-Fe | PLACEBO  | 79 | 21.0      | 1.1    | 0.1     | 1.1    | .225            |             | RDUC1 |
|          |          | DLX20BID | 76 | 21.0      | 0.8    | -0.2    | 1.0    | (.736)          | .047        |       |
|          |          | DLX40BID | 76 | 21.0      | 1.0    | 0.0     | 1.1    |                 | .583        |       |
|          |          | PRX20QD  | 67 | 21.0      | 1.0    | 0.0     | 1.2    |                 | .628        |       |
| WBC      | GI/L     | PLACEBO  | 80 | 7.43      | 1.76   | -0.31   | 1.21   | .043            |             | RDUC1 |
|          |          | DLX20BID | 76 | 7.24      | 1.83   | 0.18    | 1.76   | (.053)          | .085        |       |
|          |          | DLX40BID | 77 | 7.85      | 2.23   | -0.44   | 1.64   |                 | .359        |       |
|          |          | PRX20QD  | 69 | 7.60      | 1.99   | 0.08    | 1.92   |                 | .245        |       |
| BANDS    | GI/L     | PLACEBO  | 80 | 0.000     | 0.000  | 0.000   | 0.000  | *               |             | FULL3 |
|          |          | DLX20BID | 76 | 0.000     | 0.000  | 0.000   | 0.000  | (*)             | *           |       |
|          |          | DLX40BID | 77 | 0.000     | 0.000  | 0.000   | 0.000  |                 | *           |       |
|          |          | PRX20QD  | 69 | 0.000     | 0.000  | 0.000   | 0.000  |                 | *           |       |
| POLYS    | GI/L     | PLACEBO  | 80 | 4.565     | 1.391  | -0.284  | 1.084  | .074            |             | RDUC1 |
|          |          | DLX20BID | 76 | 4.514     | 1.411  | 0.140   | 1.604  | (.345)          | .143        |       |
|          |          | DLX40BID | 77 | 4.942     | 1.731  | -0.340  | 1.498  |                 | .511        |       |
|          |          | PRX20QD  | 69 | 4.709     | 1.590  | 0.144   | 1.679  |                 | .126        |       |
| BASO     | GI/L     | PLACEBO  | 80 | 0.046     | 0.027  | 0.004   | 0.037  | .034            |             | RDUC1 |
|          |          | DLX20BID | 76 | 0.049     | 0.027  | 0.003   | 0.025  | (.420)          | .400        |       |
|          |          | DLX40BID | 77 | 0.051     | 0.029  | 0.007   | 0.028  |                 | .178        |       |
|          |          | PRX20QD  | 69 | 0.055     | 0.031  | -0.005  | 0.045  |                 | .140        |       |
| MCV      | fL       | PLACEBO  | 79 | 89.0      | 5.4    | -0.9    | 4.1    | .055            |             | RDUC1 |
|          |          | DLX20BID | 76 | 89.6      | 5.1    | 0.9     | 3.8    | (.879)          | .006        |       |
|          |          | DLX40BID | 76 | 89.3      | 4.9    | 0.1     | 3.9    |                 | .226        |       |
|          |          | PRX20QD  | 67 | 89.7      | 4.5    | 0.0     | 4.7    |                 | .157        |       |
| U-SPGR   | NO UNITS | PLACEBO  | 54 | 1.0194    | 0.0082 | -0.0007 | 0.0080 | .013            |             | RDUC2 |
|          |          | DLX20BID | 52 | 1.0175    | 0.0075 | 0.0012  | 0.0087 | (.335)          | .212        |       |
|          |          | DLX40BID | 51 | 1.0177    | 0.0073 | 0.0039  | 0.0071 |                 | .001        |       |
|          |          | PRX20QD  | 47 | 1.0197    | 0.0077 | 0.0021  | 0.0088 |                 | .060        |       |
| TSH      | mU/L     | PRX20QD  | 2  | 0.835     | 0.021  | 0.165   | 0.148  |                 |             |       |
| CK-MB    | ng/ml    | PLACEBO  | 1  | 17.30     |        | -4.20   |        |                 |             |       |
| CKMBRI   | ngL/Uml  | PLACEBO  | 1  | 0.30      |        | 0.20    |        |                 |             |       |

**Table HMA**T**b.6.                    Laboratory Data - Nonchemistry Analytes  
Analytes with Statistically Significant Mean Change From  
Baseline to Endpoint Values  
All Randomized Patients  
Acute Therapy Phase (concluded)**

Note: n = Total number of patients in each treatment group having the variable in both baseline and postbaseline visits.

Note: Models:

FULL3 - \*1 Type III Sums of Squares from an analysis of variance (ANOVA) on the ranks: PROC GLM model=inv., treatment, and interaction.

\*2 Least-squares mean option in PROC GLM from the ANOVA on the ranks using the mean square for error.

Note: Each investigator has at least one patient in each treatment group.

RDUC1 - \*1 Type III Sums of Squares from an analysis of variance (ANOVA) on the ranks: PROC GLM model=investigator and treatment for the overall p-Value and model=investigator, treatment, and interaction for the interaction p-Value.

\*2 Least-squares mean option in PROC GLM from the ANOVA on the ranks using the mean square for error.

Note: Each investigator has at least one patient in each treatment group.

RDUC2 - \*1 Type III Sums of Squares from an analysis of variance (ANOVA) on the ranks: PROC GLM model=investigator and treatment for the overall p-Value and model=investigator, treatment, and interaction for the interaction p-Value.

\*2 Least-squares mean option in PROC GLM from the ANOVA on the ranks using the mean square for error.

Note: At least one investigator does not have patients in every treatment group.

\*Note: Error sum of squares is equal to 0, thus no p-Values are computed.

Legend of Lab Test Code Abbreviations:

| Abbrev. | Description                               |
|---------|-------------------------------------------|
| HCT     | HEMATOCRIT                                |
| MCHC    | MEAN CELL HEMOGLOBIN CONCENTRATION (MCHC) |
| WBC     | LEUKOCYTE COUNT                           |
| BANDS   | BANDS                                     |
| POLYS   | NEUTROPHILS, SEGMENTED                    |
| BASO    | BASOPHILS                                 |
| MCV     | MEAN CELL VOLUME (MCV)                    |
| U-SPGR  | UA-SPECIFIC GRAVITY                       |
| TSH     | THYROID STIM. HORMONE                     |
| CK-MB   | CK-MB (IMX)                               |
| CKMBRI  | CK-MB RELATIVE INDEX                      |

Duloxetine Hydrochloride  
Copyright © 2004 Eli Lilly and Company. All rights reserved.

Approved by Lilly 16 November 2004

**Table HMA7b.7. Summary of Vital Signs and Weight Change from Baseline to Endpoint All Randomized Patients Acute Therapy Phase**

| Variable                        | Treatment Group |                |                |                |
|---------------------------------|-----------------|----------------|----------------|----------------|
|                                 | Placebo         | Dulox 20       | Dulox 40       | Paroxetine     |
| Heart rate (bpm)                | n=86            | n=84           | n=87           | n=85           |
| Mean baseline (SD)              | 73.50 (8.40)    | 71.75 (11.04)  | 71.02 (8.10)   | 71.20 (9.75)   |
| Mean change (SD)                | -1.66 (8.47)    | 0.75 (10.02)   | 2.02 (9.86)    | -0.21 (10.03)  |
| p-value (active vs placebo)     |                 | .172           | .044           | .524           |
| Systolic blood pressure (mmHg)  | n=86            | n=84           | n=87           | n=85           |
| Mean baseline (SD)              | 119.57 (12.95)  | 117.30 (11.12) | 120.62 (13.05) | 119.76 (15.36) |
| Mean change (SD)                | -3.24 (12.50)   | 0.13 (11.85)   | -0.18 (12.51)  | 0.42 (12.53)   |
| p-value (active vs placebo)     |                 | .176           | .098           | .052           |
| Diastolic blood pressure (mmHg) | n=86            | n=84           | n=87           | n=85           |
| Mean baseline (SD)              | 75.60 (9.57)    | 75.49 (8.87)   | 77.94 (9.43)   | 77.18 (10.17)  |
| Mean change (SD)                | -0.47 (8.61)    | 2.11 (9.04)    | 0.20 (7.33)    | 0.34 (9.97)    |
| p-value (active vs placebo)     |                 | .045           | .563           | .527           |
| Weight (kg)                     | n=87            | n=84           | n=86           | n=85           |
| Mean baseline (SD)              | 80.61 (18.87)   | 82.08 (20.31)  | 83.16 (20.95)  | 89.77 (79.45)  |
| Mean change (SD)                | 0.47 (1.95)     | -0.02 (2.08)   | -0.60 (2.20)   | -0.41 (2.63)   |
| p-value (active vs placebo)     |                 | .149           | .002           | .010           |

Abbreviations: Dulox 20 BID = duloxetine 20 mg twice daily; Dulox 40 BID = duloxetine 40 mg twice daily; n = number of patients; Parox 20 QD = paroxetine 20 mg once daily; SD = standard deviation.

Duloxetine Hydrochloride  
 Copyright © 2004 Eli Lilly and Company. All rights reserved.

Approved by Lilly 16 November 2004

**Table HMA**t**.8. Treatment-Emergent Abnormal Electrocardiograms  
 All Randomized Patients  
 Acute Therapy Phase**

| Therapy     | N  | Abnormal<br>ECG<br>n (%) | Fisher's Exact Pairwise p-Values |        |        |
|-------------|----|--------------------------|----------------------------------|--------|--------|
|             |    |                          | vs. 1)                           | vs. 2) | vs. 3) |
| 1) PLACEBO  | 56 | 10 (18%)                 |                                  |        |        |
| 2) DLX20BID | 48 | 11 (23%)                 | .626                             |        |        |
| 3) DLX40BID | 52 | 10 (19%)                 | 1.00                             | .807   |        |
| 4) PRX20QD  | 48 | 10 (21%)                 | .804                             | 1.00   | 1.00   |

Fisher's Exact p-value overall = 0.9436

Program: RMP.F1JSHMAT.SASPGM.STUDYB(FQECGB1B) QCA70

Data: RMP.SAS.F1JM.MCHMATSW.STUDYB

For peer review only

1  
2  
3  
4  
5  
6  
7  
8  
9  
10  
11  
12  
13  
14  
15  
16  
17  
18  
19  
20  
21  
22  
23  
24  
25  
26  
27  
28  
29  
30  
31  
32  
33  
34  
35  
36  
37  
38  
39  
40  
41  
42  
43  
44  
45  
46  
47  
48  
49

1  
2  
3  
4  
5  
6  
7  
8  
9  
10  
11  
12  
13  
14  
15  
16  
17  
18  
19  
20  
21  
22  
23  
24  
25  
26  
27  
28  
29  
30  
31  
32  
33  
34  
35  
36  
37  
38  
39  
40  
41  
42  
43  
44  
45  
46  
47  
48  
49

Duloxetine Hydrochloride  
Copyright © 2004 Eli Lilly and Company. All rights reserved.

Approved by Lilly 16 November 2004

**Table HMA**T**b.9. Summary of Arizona Sexual Experiences Scale  
Change from Baseline to Endpoint  
All Randomized Patients  
Acute Therapy Phase**

| Variable                             | Treatment Group |              |              |              |
|--------------------------------------|-----------------|--------------|--------------|--------------|
|                                      | Placebo         | Dulox 20     | Dulox 40     | Paroxetine   |
| ASEX Total Score                     | n=49            | n=50         | n=45         | n=48         |
| Mean baseline (SD)                   | 16.20 (5.06)    | 15.90 (4.10) | 16.36 (3.90) | 15.96 (4.74) |
| Mean change (SD)                     | 0.02 (3.94)     | 0.50 (3.88)  | 0.62 (4.80)  | 0.56 (5.13)  |
| LS Means p-value (active vs placebo) |                 | 0.496        | 0.553        | .728         |
| ASEX sum of items 1 and 2            | n=85            | n=80         | n=83         | n=72         |
| Mean baseline (SD)                   | 7.53 (2.78)     | 7.55 (2.45)  | 7.58 (2.02)  | 7.60 (2.58)  |
| Mean change (SD)                     | 0.13 (2.06)     | -0.24 (2.19) | 0.02 (2.07)  | -0.10 (2.29) |
| LS means p-value (active vs placebo) |                 | .277         | .850         | .667         |

Abbreviations: ASE**X** = Arizona Sexual Experiences Scale; Dulox 20 BID = duloxetine 20 mg twice daily; Dulox 40 BID = duloxetine 40 mg twice daily; n = number of patients; Parox 20 QD = paroxetine 20 mg once daily; SD = standard deviation.



# BMJ Open

## Differences in Reporting Serious Adverse Events in Industry Sponsored Clinical Trial Registries and Journal Articles on Antidepressant and Antipsychotic Drugs – A Cross-sectional Study

|                                 |                                                                                                                                                                                                 |
|---------------------------------|-------------------------------------------------------------------------------------------------------------------------------------------------------------------------------------------------|
| Journal:                        | <i>BMJ Open</i>                                                                                                                                                                                 |
| Manuscript ID:                  | bmjopen-2014-005535.R1                                                                                                                                                                          |
| Article Type:                   | Research                                                                                                                                                                                        |
| Date Submitted by the Author:   | 16-Jun-2014                                                                                                                                                                                     |
| Complete List of Authors:       | Hughes, Shannon; Colorado State University, School of Social Work<br>Cohen, David; University of California, Los Angeles, Luskin School of Public Affairs<br>Jaggi, Rachel; University of Utah, |
| <b>Primary Subject Heading</b>: | Medical publishing and peer review                                                                                                                                                              |
| Secondary Subject Heading:      | Evidence based practice, Mental health, Pharmacology and therapeutics                                                                                                                           |
| Keywords:                       | CLINICAL PHARMACOLOGY, Adverse events < THERAPEUTICS, Clinical trials < THERAPEUTICS                                                                                                            |
|                                 |                                                                                                                                                                                                 |

SCHOLARONE™  
Manuscripts

Differences in Reporting Serious Adverse Events in Industry Sponsored Clinical Trial Registries and Journal Articles on Antidepressant and Antipsychotic Drugs - A Cross-sectional Study

Shannon Hughes, Ph.D.

Assistant Professor

School of Social Work

Colorado State University

Fort Collins, Colorado, USA 80523

David Cohen, Ph.D.

Professor

Luskin School of Public Affairs

University of California, Los Angeles

Los Angeles, California, USA 90095

Rachel Jaggi, B.A.

Research Analyst

University of Utah

Salt Lake City, Utah, USA 84112

**Corresponding Author:**

Shannon Hughes, Colorado State University, School of Social Work, 1586 Campus Delivery, Fort Collins, CO, USA 80523

Phone: (970) 491-5654

Fax: (970) 491-7280

Email: [Shannon.hughes@colostate.edu](mailto:Shannon.hughes@colostate.edu)

The Corresponding Author has the right to grant on behalf of all authors and does grant on behalf of all authors, an exclusive licence (or non exclusive for government employees) on a worldwide basis to the BMJ Publishing Group Ltd to permit this article (if accepted) to be published in BMJ editions and any other BMJ PGL products and sublicences such use and exploit all subsidiary rights, as set out in our licence.

1  
2  
3  
4  
5  
6  
7  
8  
9  
10  
11  
12  
13  
14  
15  
16  
17  
18  
19  
20  
21  
22  
23  
24  
25  
26  
27  
28  
29  
30  
31  
32  
33  
34  
35  
36  
37  
38  
39  
40  
41  
42  
43  
44  
45  
46  
47  
48  
49  
50  
51  
52  
53  
54  
55  
56  
57  
58  
59  
60  
ABSTRACT

**Objective:** To examine the degree of concordance in reporting serious adverse events (SAEs) from antidepressant and antipsychotic drug trials among journal articles and clinical trial summaries, and to categorize types of discrepancies.

**Design:** Cross-sectional study of summaries of all antidepressant and antipsychotic trials included in an online trial registry and their first associated stand-alone journal articles.

**Setting:** Clinicalstudyresults.org, sponsored by Pharmaceutical Research and Manufacturers of America; clinicaltrials.gov, administered by the US National Institutes of Health.

**Main outcome measure:** Three coders extracted data on the numbers and types of SAEs.

**Results:** 244 trial summaries for six antidepressant and antipsychotic drugs were retrieved, 142 (58.2%) listing an associated article. Of 1,608 SAEs in drug-treated participants according to trial summaries, 694 (43.2%) did not appear in associated articles. Nearly 60% of SAEs counted in articles and 41% in trial summaries had no description. Most cases of death (62.3%) and suicide (53.3%) were not reported in articles. Half or more of the 142 pairs were discordant in reporting the number (49.3%) or description (67.6%) of SAEs. These discrepancies resulted from journal articles' 1) omission of complete SAE data, 2) reporting acute phase study results only, and 3) more restrictive reporting criteria. Trial summaries with zero SAE were 2.35 (95% confidence interval, 1.58 to 3.49;  $P < 0.001$ ) times more likely to be published with no discrepancy in their associated journal article. Since clinicalstudyresults.org was removed from the Internet in 2011, only 7.8% of retrieved trial summaries appear with results on clinicaltrials.gov.

**Conclusions:** Substantial discrepancies exist in SAE data found in journal articles and registered summaries of antidepressant and antipsychotic drug trials. Two main scientific sources accessible to clinicians and researchers are limited by incomplete, ambiguous, and inconsistent reporting. Access to complete and accurate data from clinical trials of drugs currently in use remains a pressing concern.

## ARTICLE SUMMARY

**Strengths and limitations of this study**

- Published journal articles from antidepressant and antipsychotic drug trials report substantially fewer serious adverse events than associated clinical trial summaries posted by industry trial sponsors on a previously active online registry.
- Our findings of inconsistencies and ambiguities in serious adverse event reporting in both journal articles and trial summaries suggest that registries might not provide meaningfully improved access to complete and transparent clinical trial data.
- The registry from which we retrieved trial summaries has since been removed from the Internet and most trial summaries were not transferred with results to [clinicaltrials.gov](http://clinicaltrials.gov), making our analysis a unique examination of data that has been lost or scattered.
- We examined only the first stand-alone journal article associated with each trial summary, so it is possible that additional harms outcomes and longer-term outcomes absent from our sample of journal articles were reported in subsequent articles. Nevertheless, clear trends of incomplete reporting were apparent between journal article and trial summary sources.

## INTRODUCTION

Publication bias and concerns regarding the integrity of the medical treatment knowledge base have led to various mechanisms, such as publicly accessible clinical trial registries, to promote transparent and complete reporting of clinical trial results [1, 2]. As the next most accessible source of drug information after published articles, clinical trial summaries available in online trial registries might contribute to improved evidence synthesis since they are supposed to provide an inclusive synopsis of both positive and negative results [3, 4]. In this study we compare serious adverse events (SAEs) found in industry-funded antipsychotic and antidepressant drug trial summaries posted by trial sponsors on an online trial registry, with SAEs found in published journal articles reporting on the same trials.

SAEs by definition result in death, hospitalization or significant disability and are therefore particularly important to report from a clinical trial because of their potential impacts on treatment decision-making and patient safety. International Conference on Harmonization (ICH) guidelines state that SAEs “deserve special attention” relative to other types of adverse effects, including providing individual-level patient detail and narrative for each SAE in clinical trial reports submitted to regulatory agencies [5]. Regulatory agencies in the United States and across Europe require trial sponsors to immediately report unexpected or life-threatening SAEs [6, 7]. However, the extent to which SAEs are then reported in outlets for clinicians, researchers, and the public is unknown, though evidence suggests incomplete and ambiguous reporting of harms-related data [8-10]. Recent settlements resulting from state and federal lawsuits in the United States against pharmaceutical manufacturers for minimizing or concealing drug harms, further highlight the need for increased diligence in discerning what important harm-related drug information might remain unknown or distorted in scientific outlets for reporting clinical trial

1  
2  
3 results [11-13]. While previous research has demonstrated that harms data are less completely  
4 reported in journal articles than clinical trial summaries, these studies provide primarily  
5  
6 quantitative counts of reporting practices [8-10]. The present analysis seeks to elaborate the  
7  
8 nature of quantitative and qualitative differences in SAE reporting, and possible explanations for  
9  
10 reporting discrepancies.  
11  
12

13  
14  
15 Antipsychotic and antidepressant drugs — which rank among the 10 highest-selling drug  
16  
17 classes in the U.S. and the world [14, 15] — are mainstay treatments in psychiatry and  
18  
19 prescribed for myriad indicated and off-label, psychiatric and non-psychiatric uses [16, 17].  
20  
21 Journal publications, clinical trial summaries posted on trial registries, and data from regulatory  
22  
23 agencies such as the U.S. Food and Drug Administration (FDA) currently represent the primary  
24  
25 information sources for clinicians and decision-makers regarding the safety and effectiveness of  
26  
27 drug treatments. In contrast to substantially lengthier accounts of trials found in clinical study  
28  
29 reports submitted to regulatory agencies, clinical trial summaries are abbreviated, concise  
30  
31 descriptions of trials' background, methodology, and positive and negative results. Similar to  
32  
33 clinical study reports, they are structured according to templates described in the ICH *Guidelines*  
34  
35 *for Industry: Structure and Content of Clinical Study Reports* [5], though their level of detail can  
36  
37 vary substantially. Using the clinical trial summaries for all trials of these drugs posted by  
38  
39 industry sponsors on [clinicalstudyresults.org](http://clinicalstudyresults.org), we aimed to 1) count and describe SAEs reported  
40  
41 in trial summaries and, as applicable, their associated peer-reviewed journal articles, 2) assess the  
42  
43 consistency of SAE reporting between pairs of trial summaries and associated journal articles,  
44  
45 and 3) categorize possible explanations for discrepant reporting.  
46  
47  
48  
49  
50  
51

## 52 METHODS

### 53 Data Sources

1  
2  
3  
4  
5  
6  
7  
8  
9  
10  
11  
12  
13  
14  
15  
16  
17  
18  
19  
20  
21  
22  
23  
24  
25  
26  
27  
28  
29  
30  
31  
32  
33  
34  
35  
36  
37  
38  
39  
40  
41  
42  
43  
44  
45  
46  
47  
48  
49  
50  
51  
52  
53  
54  
55  
56  
57  
58  
59  
60

Clinical trials summaries were retrieved from [clinicalstudyresults.org](http://clinicalstudyresults.org), the former online public registry sponsored by the Pharmaceutical Research and Manufacturers of America (PhRMA). Published journal articles were identified using the bibliography listed on the cover page of each trial summary.

### *2.1.1 Clinical trial summaries*

The [clinicalstudyresults.org](http://clinicalstudyresults.org) registry was established in 2005 by PhRMA as a single repository for pharmaceutical manufacturers to post result summaries of their sponsored clinical trials. At the time, the federally funded [clinicaltrials.gov](http://clinicaltrials.gov), established in 2000 and administered by the U.S. National Institutes of Health, required manufacturers to register only the existence of their trials. According to PhRMA guidelines, complete results of all hypothesis-testing clinical trials completed after 2002 for products approved for marketing in the United States were to be submitted to its registry within one year after completion of the trial, and references to articles published in peer-reviewed journals added to the trial summary as soon as they were published [18].

In May 2011, we retrieved all Phase II, III, and IV clinical trial summaries (n=329) for all nine drugs within the antidepressant and antipsychotic classes listed on [clinicalstudyresults.org](http://clinicalstudyresults.org). We excluded three drugs (desvenlafaxine, quetiapine, and venlafaxine) with registered trials but no or few posted trial summaries. For the remaining six drugs (n=254 trial summaries) we retained the summaries with trial completion dates on or before 2008, allowing at least 2.5 years for a trial to reach publication in the peer-reviewed literature (see Appendix Table 1). This resulted in 244 (74%) clinical trial summaries for six drugs from three manufacturers: aripiprazole (Abilify, Bristol-Myers Squibb), atomoxetine (Strattera, Eli Lilly), duloxetine (Cymbalta, Eli Lilly), olanzapine (Zyprexa, Eli Lilly), sertraline (Zoloft, Pfizer), and

1  
2  
3 ziprasidone (Geodon, Pfizer). Trial summaries averaged 18 pages in length (range: 3 to 147).

4  
5 Supplementary File 1 provides a trial summary illustrating the typical format of the documents in  
6  
7  
8 this sample. Trial summaries include both pre-marketing studies that were sent to regulatory  
9  
10 agencies for drug approval and post-marketing studies for new indications, additional outcomes,  
11  
12 and long-term follow-up.  
13

#### 14 *Journal articles*

15  
16  
17 We used the bibliography listed on the cover page of each trial summary to retrieve the  
18  
19 earliest journal article reporting on the full trial. We emailed and telephoned the medical  
20  
21 communications, clinical trials, or customer relations department of each manufacturer of the  
22  
23 included drugs to inquire about the completeness of the list of trial summaries and journal  
24  
25 articles posted on [clinicalstudyresults.org](http://clinicalstudyresults.org). No representative from any manufacturer could  
26  
27 confirm completeness of the posted lists nor provide a current list of all clinical trials and journal  
28  
29 publications for the respective drugs. Representatives directed us to visit [clinicaltrials.gov](http://clinicaltrials.gov) to  
30  
31 view current and completed trials, and PubMed for a list of publications. We then attempted to  
32  
33 manually search PubMed to match possible additional publications with the trial summaries, but  
34  
35 the absence of trial identification numbers in journal articles made it extremely difficult to  
36  
37 crosscheck and match all sources reliably. These additional efforts, therefore, did not affect the  
38  
39 final sample size.  
40  
41  
42  
43  
44

#### 45 Data Extraction

46  
47  
48 We employed double data extraction. One coder extracted the number and exact  
49  
50 description of SAEs reported to occur in drug-treated participants from the *Results* section of  
51  
52 each trial summary and journal article. For multi-phase trials, we tallied the SAEs occurring in  
53  
54 each phase. The number of patients experiencing SAEs was counted in the few cases where the  
55  
56  
57  
58  
59  
60



1  
2  
3 number of events was not provided, therefore underestimating the actual number of SAEs. We  
4  
5 also extracted from each source the trial start and completion year, article publication date, study  
6  
7 length, sample size, targeted indication, and consistency of reporting SAEs (see explanation  
8  
9 below). A second coder independently extracted these data from a 50% random sample of trial  
10  
11 summaries and articles for three of the six drugs. A third coder repeated the same process for the  
12  
13 other three drugs. The values obtained by the second and third coders were compared to those  
14  
15 obtained by the first. Any discrepancies were resolved by consensus. Coding for most reports  
16  
17 and articles was straightforward and few disagreements in recordings between coders were  
18  
19 found.  
20  
21  
22  
23

24  
25 We evaluated the consistency of the number and description of SAEs occurring in drug-  
26  
27 treated participants reported between each trial summary and its associated article. The *number*  
28  
29 of SAEs was considered inconsistent if (1) reported numbers differed between the two sources  
30  
31 (e.g., aripiprazole trial CN138-008: trial summary cited 7, journal article 6, SAEs), (2) one  
32  
33 source reported the number of SAEs while the other contained no or an ambiguous statement  
34  
35 about their occurrence; or (3) the journal article did not report the trial phase in which SAEs did  
36  
37 occur according to the trial summary (e.g., ziprasidone trial 1006: in a 60-week multi-phase  
38  
39 study with 8 SAEs reported in the summary, the article reports findings from the 8-week acute  
40  
41 phase with zero SAEs). The *description* of SAEs was considered inconsistent if only one source  
42  
43 described the events (e.g., duloxetine trial 6091: the summary describes 1 SAE as an intentional  
44  
45 overdose, the article omits the description but accurately reports the number), or if one source  
46  
47 less completely described the events than the other source (e.g., duloxetine trial 8601: the  
48  
49 summary lists one death from suicide as well as other SAEs related to psychiatric worsening, but  
50  
51 the article mentions only the suicide). Sources were considered consistent if both reported the  
52  
53  
54  
55  
56  
57  
58  
59  
60

1  
2  
3 number or description of SAEs identically, or if neither reported such information. In each  
4  
5 instance of discrepant reporting, we performed an in-depth inductive analysis involving a careful  
6  
7 review of the trial summary and journal article to identify a possible explanation for the  
8  
9 discrepancy. We then grouped the emerging patterns, which resulted in three categories  
10  
11 (described in the results section): differences in study length or phase reported, differences in  
12  
13 reporting criteria used, and apparent selective reporting of SAE data. Discrepancies were only  
14  
15 assigned to the latter category after ruling out the other two explanations. No additional  
16  
17 categories to explain discrepant reporting emerged from the analysis.  
18  
19

## 20 21 22 Analysis

23  
24 We used descriptive statistics to summarize quantitative variables related to study  
25  
26 characteristics and frequencies for categorical variables. We calculated the number of SAEs per  
27  
28 patient treated for each drug by dividing the number of SAEs reported in trial summaries and  
29  
30 journal articles, respectively, by the total number of drug-treated participants.  
31  
32

33  
34 We extracted exact descriptions of SAEs and then categorized them as: behavioral or  
35  
36 cognitive, physical, no description provided, and unspecified (including overdose, dependence,  
37  
38 death or hospitalization for unspecified reasons, and accidental injury). We further counted the  
39  
40 number of SAEs reported as death, suicide, suicide attempt, homicidal ideation, and new or  
41  
42 worsened psychiatric symptoms.  
43  
44

45  
46 We calculated risk ratios to test the likelihood of trial summaries reporting zero SAEs to  
47  
48 be published as stand-alone journal articles in a manner congruent with the summaries, compared  
49  
50 to trial summaries reporting  $\geq 1$  SAEs. Risk ratios were calculated with 95% confidence intervals  
51  
52 and Pearson's chi-square analysis using PASW Statistics, version 18 software [19].  
53  
54

## 55 RESULTS

56  
57  
58  
59  
60

## Search Results and Sample Selection

Using the bibliography listed on the cover page of each trial summary, we counted a total of 496 listed publications (an average of two publications per trial, with an average time to publication of 2.5 years), from which we retrieved the earliest journal article reporting on the full trial. From the total we excluded 261 (52.6%) sub-set analyses (i.e., reports on a sub-set of the total sample based on a shared characteristic, such as gender), meta-analyses, and conference abstracts. Of the 244 trial summaries, 72 (29.5%) listed no publication of any kind, 30 (12.3%) listed only one or more of the excluded publication types, and 142 (58.2%) listed at least one associated stand-alone journal article (see Figure 1). The final sample consisted of 142 trial summary-journal article pairs listed on [clinicalstudyresults.org](http://clinicalstudyresults.org) and an additional 102 trial summaries from the registry with no associated journal article.

## Sample Description

For each of the six drugs included in this analysis, Table 1 summarizes trial characteristics as reported in trial summaries, their associated journal articles, and the additional trial summaries having no associated journal article (referred to as *unpublished trial summary* on all tables and appendices). Overall, a stand-alone journal article was available for 58.2% of trials in this sample, though this varied by drug from a low of 27.6% for trials of ziprasidone to 72.9% for trials of duloxetine. Journal articles reported findings for an identical or nearly identical number of participants as their associated trial summaries. The 102 unpublished summaries, however, included data on an additional 20,084 drug-treated participants. The median study length was shorter in journal articles (11 weeks) than in their paired trial summaries (12 weeks) or unpublished trial summaries (16 weeks).

1  
2  
3 The three antipsychotic drugs (n=129 trial summaries) were being tested for the treatment  
4 of psychotic disorders (56.6% of studies), bipolar disorder or mania (26.4%), or other conditions  
5 (16.2%) such as depressive disorders, Alzheimer's, autism, alcohol dependence, or borderline  
6 personality disorder. The three antidepressant drugs (n=115 trial summaries) were being studied  
7 for the treatment of attention deficit hyperactivity disorder (42.6%), depressive disorders  
8 (34.8%), anxiety disorders (8.7%), or other conditions (14%) such as pain-related disorders or  
9 post-traumatic stress disorder.  
10  
11  
12  
13  
14  
15  
16  
17  
18

#### 19 Serious Adverse Events in Trial Summaries

20  
21  
22 Ninety percent of all trial summaries (n=244) reported a precise number of SAEs  
23 occurring in the trial. The 142 trial summaries with an associated journal article reported 1,608  
24 SAEs, and the 102 trial summaries with no associated journal article reported an additional 1,423  
25 SAEs. Table 2 details the total and per patient numbers of SAEs reported in trial summaries for  
26 each drug. Appendix Table 2 lists additional SAEs for the 10 excluded trial summaries with trial  
27 completion dates in 2009 or later.  
28  
29  
30  
31  
32  
33  
34  
35

36 No description was provided for 41% of the SAEs cited in trial summaries (46% and 20%  
37 of SAEs in antipsychotic and antidepressant trials, respectively). An additional 11.6% of SAEs  
38 were non-specifically described, such as "accidental injury" in duloxetine trial 1126. When a  
39 specific description was present, we categorized 28.4% of SAEs as behavioral or cognitive and  
40 18.9% as physical. Table 3 details all cases of death, suicide, and new or worsened psychiatric  
41 symptoms for each drug.  
42  
43  
44  
45  
46  
47  
48  
49

#### 50 Serious Adverse Events in Journal Articles

51  
52  
53 Nearly 40% of journal articles failed to specify the number of SAEs that occurred in the  
54 trial (Table 2), containing either no statement related to SAEs or an ambiguous statement without  
55  
56  
57  
58  
59  
60

1  
2  
3 an actual number of SAEs, such as sertraline trial 1060: “no subjects had serious adverse events  
4 related to study treatment.” A total of 914 SAEs were reported across the 85 journal articles that  
5 did include specific data on SAE occurrence.  
6  
7  
8

9  
10 Most SAEs (58.9%) reported in journal articles (61% in antipsychotic and 55.5% in  
11 antidepressant trials) had no accompanying description and another 8% were non-specifically  
12 described. Nearly one-fifth (18.9%) of SAEs were behavioral or cognitive in nature and 14.6%  
13 were described as physical. Table 3 shows that one-quarter of SAEs described in journal articles  
14 were categorized as death, suicide, homicidal ideation, or new or worsened psychiatric  
15 symptoms.  
16  
17  
18  
19

#### 20 Consistency of Reporting in Trial Summary-Journal Article Pairs

21  
22 Just over half (56.8%) of the 1,608 SAEs experienced by drug-treated participants  
23 according to trial summaries (n=142) were also reported in associated journal articles. This  
24 proportion varied widely between the drugs, from 14.8% of SAEs in atomoxetine trials to  
25 114.6% in aripiprazole trials (see Table 2). The number of SAEs per patient for most drugs were  
26 lower in articles (0.03, range: 0.003 - 0.07) than in associated summaries (0.05, range: 0.02 –  
27 0.13). Trial summaries with no associated article averaged the highest number of SAEs per  
28 patient (0.07, range: 0.01 – 0.14).  
29  
30  
31  
32  
33  
34  
35  
36  
37  
38  
39  
40  
41  
42

43  
44 Half or more of the 142 trial summary-journal article pairs were discordant in reporting  
45 the number (49.3%) or description (67.6%) of SAEs (Table 4). In half of these pairs, the reported  
46 number of SAEs differed by more than 20% between the two sources.  
47  
48  
49

50  
51 Both journal articles and associated trial summaries failed to describe a substantial  
52 proportion of SAEs. Most cases of death (62.3%) and suicide (53.3%) cited in trial summaries  
53 were not reported in associated journal articles (Table 3).  
54  
55  
56  
57  
58  
59  
60

1  
2  
3 The 34 trial summaries with zero SAEs were 2.35 (95% confidence interval, 1.58 to 3.49;  
4  
5 P<0.001) times as likely to have an associated journal article reporting this data consistently with  
6  
7 the trial summary data as were the 181 summaries with 1 or more SAEs.  
8  
9

#### 10 Explanations for Discrepant Reporting

11  
12 Seventy (49.3%) of the 142 trial summary-journal article pairs were discrepant in SAE  
13  
14 reporting. Half of these instances might be explained by differences between sources in the study  
15  
16 length or phase being reported (25%, 18/70) or in the reporting criteria used (25%, 18/70). Table  
17  
18 5 provides examples of each of these forms of discrepant reporting. Importantly, while some  
19  
20 journal articles appeared to apply more restrictive reporting criteria that might lead to omitting  
21  
22 certain data, the many articles that did report exact SAE numbers often did so regardless of  
23  
24 presumed causality to the study drug. For example, articles and summaries for olanzapine trials  
25  
26 3131 and 7031 reported all SAEs even though some events were thought to be unrelated to the  
27  
28 study drug. Yet, the article for olanzapine trial 4414 separately details SAEs thought to be related  
29  
30 and unrelated to the drug [20]. Thus, no clear or consistent pattern on SAE reporting criteria  
31  
32 emerged from this sample of journal articles.  
33  
34  
35  
36  
37  
38

39 Another one-third (34.3%, 24/70) of discrepancies appear to be simple failures of journal  
40  
41 articles to report complete SAE data (see Table 5). In a minority (14.3%, 10/70) of cases,  
42  
43 however, the journal article provided more precise data or a higher number of SAEs than the trial  
44  
45 summary. The article for aripiprazole trial CN138-050, for example, cites 6 SAEs in drug-treated  
46  
47 participants [21], while the summary states only that the incidence of SAEs was low.  
48  
49

#### 50 Post Hoc Analysis of Clinical Trial Summaries on Clinicaltrials.gov

51  
52  
53 In December 2011, clinicalstudyresults.org was removed from the Internet for unknown  
54  
55 reasons. The Internet archive for the website (found here: [Internet archive](#)) suggests that the  
56  
57  
58  
59  
60

1  
2  
3 expansion of other registries made clinicalstudyresults.org seem redundant from industry's  
4  
5 perspective [22]. One year after this removal of the registry, we cross-checked our data source by  
6  
7 searching for each of the 244 trial summaries on clinicaltrials.gov. (In that database, the U.S.  
8  
9 Food and Drug Administration Amendment Act [FDAAA] of 2007 newly mandated trial  
10  
11 sponsors to include summary reporting of results for trials that were initiated after or ongoing as  
12  
13 of late 2007.) Our search revealed that 139 (57%, range across drugs: 25% - 80%) of the 244  
14  
15 trials were registered on clinicaltrials.gov, but only 15 of these (10.8%, range across drugs: 0% -  
16  
17 39%) had posted study results. In October 2013, nearly two years after the  
18  
19 clinicalstudyresults.org takedown, these numbers had only slightly budged, with 19 registered  
20  
21 trials now reporting study results. While nearly all (99%) of the trial summaries not currently  
22  
23 registered on clinicaltrials.gov have trial start or completion dates prior to 2007, 75% of trial  
24  
25 summaries that *are* registered on the website also have pre-2007 trial dates. In the interest of  
26  
27 openness and transparency, we created a publicly accessible website ([www.rxarchives.com](http://www.rxarchives.com))  
28  
29 where all 244 trial summaries are posted in pdf format and freely available for download.  
30  
31  
32  
33  
34  
35

## 36 DISCUSSION

37  
38 This study demonstrates that a substantially lower number of SAEs appear in published  
39  
40 journal articles than registered trial summaries of antidepressant and antipsychotic drug trials,  
41  
42 and shows further that both sources for drug information are often inconsistent or ambiguous in  
43  
44 SAE reporting. In this study, 43.2% of all SAEs appearing in 142 trial summaries posted on an  
45  
46 online registry across six psychotropic drugs were not reported in the first associated stand-alone  
47  
48 journal articles listed by the drug's manufacturer. Failure to describe the nature of SAEs was also  
49  
50 common in both sources. Given that many consumers of psychotropic drugs take these  
51  
52 medications for months or years, that approximately one-quarter of journal articles reported only  
53  
54  
55  
56  
57  
58  
59  
60

1  
2  
3 acute phase results of longer-term trials and that the median study length in trial summaries with  
4 an associated journal article (12 weeks) was four weeks shorter than in trials without a journal  
5 article highlight an additional attrition of evidence on longer term outcomes.  
6  
7  
8  
9

10 These findings are congruent with other recent analyses demonstrating more complete  
11 outcomes information in registered clinical trial summaries compared to published journal  
12 articles [9], although examination of full clinical study reports reveals that both of the latter  
13 sources suffer from incomplete reporting of key data [10]. Similar to our results, Riveros and  
14 colleagues [9] found that registered trial summaries (99%; present study 90%) more often report  
15 data on serious adverse events compared to published articles (63%; present study 60%).  
16  
17 However, in an analysis comparing publicly available data in registered clinical trial summaries  
18 and journal publications to full clinical study reports submitted to a regulatory agency for drug  
19 products, the former sources reported complete information on harms outcomes significantly less  
20 (~25%) than clinical study reports (87% of harms outcomes reported completely) [10]. SAEs,  
21 specifically, were reported completely only 51% of the time in journal articles and trial  
22 summaries, and 30% of SAE outcomes were not reported at all in these sources. In their analysis  
23 of full clinical study reports on the influenza drug Tamiflu, Doshi, Jefferson, and Del Mar [3] are  
24 alarmed by the important data remaining unknown to most physicians when clinical trial  
25 information is limited to the published journal literature. The occurrence of SAEs and the  
26 rationales for classifying events as adverse are among many possible discoveries in clinical study  
27 reports that can markedly alter a drug's benefit-to-risk profile. While publication bias of this sort  
28 in the literature has long been acknowledged or suspected [23-25], the present study clarifies the  
29 degree to which such bias distorts the perception of important harms outcomes (i.e., number and  
30 nature of SAEs) across two classes of popularly used psychotropic drugs. Also, this study adds to  
31  
32  
33  
34  
35  
36  
37  
38  
39  
40  
41  
42  
43  
44  
45  
46  
47  
48  
49  
50  
51  
52  
53  
54  
55  
56  
57  
58  
59  
60



1  
2  
3 the evidence base questioning whether information posted in online clinical trial registries  
4  
5 represents meaningful improvement.  
6  
7

8 For another 102 trials with no associated stand-alone journal article in the present study,  
9  
10 the clinical trial summaries report an additional 1,423 SAEs and represent the only publicly  
11  
12 available data source on these trials. In a recent examination of 585 large randomized trials  
13  
14 registered on clinicaltrials.gov, 29% had no associated journal publication and most (78%) of  
15  
16 those also had no results available on the clinicaltrials.gov registry [26]. Riveros and colleagues  
17  
18 [9] found that 50% of 594 randomly sampled controlled drug trials on clinicaltrials.gov had no  
19  
20 corresponding published article. These findings highlight the necessity for clinicians,  
21  
22 researchers, and decision-makers to consult multiple sources in order to achieve a comprehensive  
23  
24 and more complete appraisal of drugs' safety profile, although again, clinical trial summaries are  
25  
26 themselves limited by incomplete reporting [10, 27] and by regulatory policies that require  
27  
28 registration of only recent [1] or new trials [28].  
29  
30  
31  
32  
33

34 Our post hoc analysis further revealed that, while 57% (139/244) of the present sample  
35  
36 of trial summaries are registered on clinicaltrials.gov, only 7.8% (19/244) are available on the  
37  
38 registry with results. Three-quarters of these currently registered trials have trial start or  
39  
40 completion dates prior to 2007, thereby suggesting that actual registration practices on  
41  
42 clinicaltrials.gov may be more inclusive than the minimum requirements set out by the FDAAA.  
43  
44 Access to the full evidence base of drugs currently in use, including recent studies and those  
45  
46 conducted prior to widespread deployment of registries, is essential for sound treatment decision-  
47  
48 making and the assurance of present day patient safety [10, 29], but the important efficacy and  
49  
50 harms information contained in these 225 trials on six psychotropic drugs has been lost or  
51  
52 scattered. As of this writing, Pfizer (sertraline and ziprasidone) and Bristol-Myers Squibb  
53  
54  
55  
56  
57  
58  
59  
60

1  
2  
3 (aripiprazole) company websites include trial summaries or links to clinicaltrials.gov only for  
4  
5 trials completed or ongoing as of 2007, in accordance with FDAAA guidelines. All clinical trial  
6  
7 summaries included in the present analysis for atomoxetine, duloxetine, and olanzapine are  
8  
9 available on Eli Lilly's company website. Some data, then, have been lost to the evidence base  
10  
11 with the removal of clinicalstudyresults.org, while other data are still available but no longer  
12  
13 accessible through a single repository. The important harms data contained in the present body of  
14  
15 trial summaries provides further support for the recommendation that all ongoing, recent, and  
16  
17 archive drug trials for all new and existing drugs be made available to clinicians and consumers  
18  
19 in a clear and accessible format, including links between all trial-related documents (journal  
20  
21 articles, registry records, trial protocol, and so on) for transparent navigation of each trial  
22  
23 component to the core study [10, 30, 31].  
24  
25  
26  
27  
28

29 The present study has important limitations and strengths. First, although participating  
30  
31 industry trial sponsors had posted on their respective websites statements of their commitment to  
32  
33 posting all trial results in a timely manner on clinicalstudyresults.org, the completeness and  
34  
35 accuracy of trial summaries on clinicalstudyresults.org could not be verified. However, since our  
36  
37 crosscheck of summaries on clinicaltrials.gov revealed that few of these trials were transferred  
38  
39 with results, our present analysis provides a glimpse on unique trial evidence that a  
40  
41 contemporary standard database fails to capture. Second, only the first stand-alone journal article  
42  
43 for each trial was included in this analysis. For trials with multiple publications, additional  
44  
45 information on SAEs might appear in subsequent articles. However, this possibility might be  
46  
47 slight as the median number of journal articles per trial summary was one, and over half of total  
48  
49 articles listed for the six drugs were pooled or sub-set analyses or conference abstracts. We do  
50  
51 not know whether the trends observed in the 142 trial summary-journal article pairs would hold  
52  
53  
54  
55  
56  
57  
58  
59  
60

1  
2  
3 for the other 102 trials. Finally, the results of this study cannot be generalized to other drugs and  
4  
5 drug classes, but do add to the substantial body of empirical findings demonstrating poor adverse  
6  
7 event assessment and reporting practices and a distortion of evidence through selective reporting  
8  
9 of industry-sponsored psychotropic drug research [24, 32-35].  
10  
11

12  
13 The integrity of the medical treatment knowledge base preserves sound clinical practice  
14  
15 and ensures patient safety. If nearly half of serious adverse events in psychotropic drug research  
16  
17 are not reported in journal articles and many more can be found in sources not easily accessed by  
18  
19 relevant treatment decision-makers [3, 10, 36], then, without integrating multiple data sources,  
20  
21 benefit-to-harm assessments made by groups constructing clinical guidelines and by individual  
22  
23 clinicians making prescription decisions are based on incomplete evidence and likely biased  
24  
25 toward underestimating risks. Multiple solutions to the grave problem of incomplete reporting of  
26  
27 clinical trials have been proposed, and some recent strides have been made. Some suggest  
28  
29 shifting toward public funding and control of drug research in order to produce credible  
30  
31 information accessible and transparent to all stakeholders [37-40]. Some propose to treat failures  
32  
33 to disclose complete knowledge of adverse effects from clinical trials as criminal offenses  
34  
35 requiring criminal prosecution of responsible individuals and companies [41]. At the same time,  
36  
37 ongoing campaigns have gained momentum across the United Kingdom in calling for  
38  
39 pharmaceutical manufacturers to share clinical study reports on all drugs in use [31] and in the  
40  
41 United States for sharing clinical trial datasets with independent scientists [42]. Many agree,  
42  
43 however, that regulatory requirements for registering new and ongoing studies does not  
44  
45 adequately protect the millions of patients currently taking prescription drugs [10, 31], and the  
46  
47 pharmaceutical industry has been slow and resistant to accepting the level of openness that  
48  
49 scientists and the public have been calling for [31, 43].  
50  
51  
52  
53  
54  
55  
56  
57  
58  
59  
60

1  
2  
3  
4  
5  
6  
7  
8  
9  
10  
11  
12  
13  
14  
15  
16  
17  
18  
19  
20  
21  
22  
23  
24  
25  
26  
27  
28  
29  
30  
31  
32  
33  
34  
35  
36  
37  
38  
39  
40  
41  
42  
43  
44  
45  
46  
47  
48  
49  
50  
51  
52  
53  
54  
55  
56  
57  
58  
59  
60

The present findings highlight inconsistencies in harms-related reporting between published articles and trial registry summaries of psychotropic drugs, and indicate that clinical decisions regarding drug use may be based on substantially truncated evidence. Policy discussions in this area should consider to what extent patients who use drugs, clinicians who prescribe drugs and the public who finance most of their use deserve access to complete and accurate scientific data from drug trials.

**Competing Interests:** All authors have completed the ICMJE uniform disclosure form at [www.icmje.org/coi\\_disclosure.pdf](http://www.icmje.org/coi_disclosure.pdf) and declare: no support from any organisation for the submitted work; no financial relationships with any organisations that might have an interest in the submitted work in the previous three years; no other relationships or activities that could appear to have influenced the submitted work.

**Funding:** This research received no specific grant from any funding agency in the public commercial or not-for-profit sectors.

**Contributors:** SH and DC conceived the idea of the study and were responsible for the design of the study. SH and RJ were responsible for the acquisition of the data, for undertaking data coding and analysis, and produced the tables. DC also contributed to data coding, and provided critical input into the analysis and interpretation of results. The initial draft of the manuscript was prepared by SH and then circulated repeatedly among all authors for critical revision.

**Data Sharing:** All clinical trial summaries that were analysed in this study have been uploaded by the first author (S.H.) to a publicly-accessible website ([www.rxarchives.com](http://www.rxarchives.com)) for download.

## REFERENCES

- [1] Dickersin K, Rennie D. The evolution of trial registries and their use to assess the clinical trial enterprise. *JAMA*. 2012;307(17):1861-4.
- [2] Turner E. Publication bias, with a focus on psychiatry: Causes and solutions. *CNS Drugs*. 2013;27(6):457-68.
- [3] Doshi P, Jefferson T, Del Mar C. The imperative to share clinical study reports: Recommendations from the Tamiflu experience. *Plos Med*. 2012;9(4):e1001201.
- [4] Doshi P, Jones M, Jefferson T. Rethinking credible evidence synthesis. *BMJ*. 2012;344:d7898.
- [5] Structure and content of clinical study reports E3. 1995 [cited; Available from: [http://www.ich.org/fileadmin/Public\\_Web\\_Site/ICH\\_Products/Guidelines/Efficacy/E3/E3\\_Guide\\_line.pdf](http://www.ich.org/fileadmin/Public_Web_Site/ICH_Products/Guidelines/Efficacy/E3/E3_Guide_line.pdf)]
- [6] Guidance for industry and investigators: Safety reporting requirements for INDs and BA/BE studies. 2012 [cited; Available from: <http://www.fda.gov/downloads/Drugs/GuidanceComplianceRegulatoryInformation/Guidances/UCM227351.pdf>]
- [7] Reporting requirements of individual case safety reports (ICSRs) applicable to marketing authorisation holders during the interim period. 2013 [cited; Available from: [http://www.ema.europa.eu/docs/en\\_GB/document\\_library/Regulatory\\_and\\_procedural\\_guideline/2012/05/WC500127657.pdf](http://www.ema.europa.eu/docs/en_GB/document_library/Regulatory_and_procedural_guideline/2012/05/WC500127657.pdf)]
- [8] Earley A, Lau J, Uhling K. Haphazard reporting of deaths in clinical trials: A review of cases of ClinicalTrials.gov records and matched publications - a cross-sectional study. *BMJ Open*. 2013;3:e001963.
- [9] Riveros C, Dechartes A, Perrodeau E, et al. Timing and completeness of trial results posted at Clinicaltrials.gov and published in journals. *Plos Med*. 2013;10(12):e1001566.
- [10] Wieseler B, Wolfram N, McGauran N, et al. Completeness of reporting of patient-relevant clinical trial outcomes: Comparison of unpublished clinical study reports with publicly available data. *Plos Med*. 2013;10(10):e1001526.
- [11] Thomas K. J.&J. fined \$1.2 billion in drug case. *New York Times* 2012 April 12, 2012 [cited; Available from: <http://www.nytimes.com/2012/04/12/business/drug-giant-is-fined-1-2-billion-in-arkansas.html>]
- [12] Thomas K, Schmidt M. Glaxo agrees to pay \$3 billion in fraud settlement. *New York Times* 2012 [cited; Available from: <http://www.nytimes.com/2012/07/03/business/glaxosmithkline-agrees-to-pay-3-billion-in-fraud-settlement.html?pagewanted=all>]
- [13] Almashat S, Wolfe S. Pharmaceutical industry criminal and civil penalties: An update. 2012 [cited October 21, 2013]; Available from: <http://www.citizen.org/documents/2073.pdf>
- [14] Top therapeutic classes by U.S. spending. 2012 [cited 2012 July 18, 2012]; Available from: [http://www.imshealth.com/deployedfiles/ims/Global/Content/Corporate/Press%20Room/Top-Line%20Market%20Data%20&%20Trends/2011%20Top-line%20Market%20Data/Top\\_Therapy\\_Classes\\_by\\_Sales.pdf](http://www.imshealth.com/deployedfiles/ims/Global/Content/Corporate/Press%20Room/Top-Line%20Market%20Data%20&%20Trends/2011%20Top-line%20Market%20Data/Top_Therapy_Classes_by_Sales.pdf)
- [15] Top 20 global therapeutic classes, 2011. 2012 [cited; Available from: [http://www.imshealth.com/deployedfiles/ims/Global/Content/Corporate/Press%20Room/Top-Line%20Market%20Data%20&%20Trends/2011%20Top-line%20Market%20Data/Top\\_20\\_Global\\_Therapeutic\\_Classes.pdf](http://www.imshealth.com/deployedfiles/ims/Global/Content/Corporate/Press%20Room/Top-Line%20Market%20Data%20&%20Trends/2011%20Top-line%20Market%20Data/Top_20_Global_Therapeutic_Classes.pdf)]

- 1  
2  
3 [16] Alexander G, Gallagher S, Mascola A, et al. Increasing off-label use of antipsychotic  
4 medications in the United States, 1995-2008. *Pharmacoepidemiol Drug Saf.* 2011;20(2):177-84.  
5 [17] Mark T. For what diagnoses are psychotropic medications being prescribed?: A  
6 nationally representative survey of physicians. *CNS Drugs.* 2010;24(4):319-26.  
7 [18] PhRMA clinical study results database proposal. 2004 [cited August 30, 2008];  
8 Available from:  
9 [http://www.aei.org/files/2004/09/20/20040927\\_ClinicalStudyResultsDatabase.pdf](http://www.aei.org/files/2004/09/20/20040927_ClinicalStudyResultsDatabase.pdf)  
10 [19] PASW Statistics, 18.0. Chicago: Predictive Analytics Software 2009.  
11 [20] De Deyn PP, Carrasco M, Deberdt W, et al. Olanzapine versus placebo in the treatment  
12 of psychosis with or without associated behavioral disturbances in patients with Alzheimer's  
13 disease. *Int J Geriatr Psychiatry.* 2004;19:115-26.  
14 [21] Tran-Johnson T, Sack D, Marcus R, et al. Efficacy and safety of intramuscular  
15 aripiprazole in patients with acute agitation: A randomized, double-blind, placebo-controlled  
16 trial. *J Clin Psychiatry.* 2007;68(1):111-9.  
17 [22] Veitch E. Silent takedown of the pharma trials database...and more. 2012 [cited;  
18 Available from: [http://blogs.plos.org/speakingofmedicine/2012/03/23/silent-takedown-of-the-](http://blogs.plos.org/speakingofmedicine/2012/03/23/silent-takedown-of-the-pharma-trials-database%E2%80%A6and-more/)  
19 [pharma-trials-database%E2%80%A6and-more/](http://blogs.plos.org/speakingofmedicine/2012/03/23/silent-takedown-of-the-pharma-trials-database%E2%80%A6and-more/)  
20 [23] Chan A-W, Hrobjartsson A, Haahr MT, et al. Empirical evidence for selective reporting  
21 of outcomes in randomized trials: comparison of protocols to published articles. *JAMA.*  
22 2004;291(20):2457-65.  
23 [24] Heres S, Davies J, Maino K, et al. Why olanzapine beats risperidone, risperidone beats  
24 quetiapine, and quetiapine beats olanzapine: An exploratory analysis of head-to-head comparison  
25 studies of second-generation antipsychotics. *Amer J Psych.* 2006;163:185-94.  
26 [25] Ioannidis JPA, Lau J. Completeness of safety reporting in randomized trials: An  
27 evaluation of 7 medical areas. *JAMA.* 2001;285:437-43.  
28 [26] Jones C, Handler L, Crowell K, et al. Non-publication of large randomized clinical trials:  
29 cross sectional analysis. *BMJ.* 2013;347:f6104.  
30 [27] Wieseler B, Kerekes MF, Vervoeelgyi V, et al. Impact of document type on reporting  
31 quality of clinical drug reports: a comparison of registry reports, clinical study reports, and  
32 journal publications. *Br Med J.* 2012;344:d8141.  
33 [28] Torjesen I. Europe's drug agency will publish clinical trial data for new products from  
34 2014. *BMJ.* 2012;345:e8061.  
35 [29] Doshi P, Dickersin K, Healy D, et al. Restoring invisible and abandoned trials: A call for  
36 people to publish findings. *BMJ.* 2013;346:f2865.  
37 [30] Chan A-W, Song F, Vickers A, et al. Increasing value and reducing waste: addressing  
38 inaccessible research. *The Lancet.* 2014;383:257-66.  
39 [31] Goldacre B. Are clinical trial data shared sufficiently today? No. *BMJ.* 2013;347(f1880).  
40 [32] Kirsch I, Moore T, Scoboria A, et al. The emperor's new drugs: An analysis of  
41 antidepressant medication data submitted to the U.S. Food and Drug Administration. *Prevention*  
42 *& Treatment.* 2002;5(23).  
43 [33] Melander H, Ahlqvist-Rastad J, Meijer G, et al. Evidence-b(i)ased medicine -- selective  
44 reporting from studies sponsored by pharmaceutical industry: Review of studies in new drug  
45 applications. *Br Med J.* 2003;326:1171-3.  
46 [34] Papanikolaou P, Churchill R, Wahlbeck K, et al. Safety reporting in randomized trials of  
47 mental health interventions. *Amer J Psych.* 2004;161:1692-7.  
48  
49  
50  
51  
52  
53  
54  
55  
56  
57  
58  
59  
60

- 1  
2  
3 [35] Turner E, Matthews AM, Linardatos E, et al. Selective publication of antidepressant trials  
4 and its influence on apparent efficacy. *The New England Journal of Medicine*. 2008;358:252-60.  
5 [36] Rodgers M, Brown J, Heirs M, et al.. Reporting of industry funded study outcome data:  
6 comparison of confidential and publicized data on the safety and effectiveness of rhBMP-2 for  
7 spinal fusion. *BMJ*. 2013;346:f3981.  
8 [37] Angell M. Industry-sponsored clinical research: a broken system. *JAMA*.  
9 2008;300(9):1069-71.  
10 [38] Relman A, Angell M. America's other drug problem. *The New Republic*.  
11 2002;227(25):27-41.  
12 [39] Baker D. The benefits and savings from publicly funded clinical trials of prescription  
13 drugs. *International Journal of Health Services*. 2008;38(4):731-50.  
14 [40] Ross JS, Gross CP, Krumholz HM. Promoting transparency in pharmaceutical-sponsored  
15 research. *American Journal of Public Health*. 2012;102(1):72-80.  
16 [41] Gotzsche PC. *Deadly medicines and organized crime: How big pharma has corrupted*  
17 *healthcare*. London: Radcliffe Publishing 2013.  
18 [42] Peart K. Yale program's agreement with Johnson & Johnson allows broad access to  
19 clinical trial data. 2014 [cited; Available from: [http://news.yale.edu/2014/01/30/yale-program-s-  
20 agreement-johnson-johnson-allows-broad-access-clinical-trial-data](http://news.yale.edu/2014/01/30/yale-program-s-agreement-johnson-johnson-allows-broad-access-clinical-trial-data)  
21 [43] Castellani J. Are clinical trial data shared sufficiently today? Yes. *BMJ*. 2013;347:f1881.  
22 [44] Prasad S, Harpin V, Poole L, et al. A multi-centre, randomised, open-label study of  
23 atomoxetine compared with standard current therapy in UK children and adolescents with  
24 attention-deficit/hyperactivity disorder (ADHD). *Current Medical Research and Opinion*.  
25 2007;23(2):379-94.  
26 [45] Meehan K, Zhang F, David S, et al. A double-blind, randomized comparison of the  
27 efficacy and safety of intramuscular injections of olanzapine, lorazepam, or placebo in treating  
28 acutely agitated patients diagnosed with bipolar mania. *J Clin Psychopharmacol*.  
29 2001;21(4):389-97.  
30 [46] Zimbroff D, Warrington L, Loebel A, et al. Comparison of ziprasidone and aripiprazole  
31 in acutely ill subjects with schizophrenia or schizoaffective disorder: A randomized, double-  
32 blind, 4-week study. *Int Clin Psychopharmacol*. 2007;6:363-70.  
33 [47] Kratochvil C, Michelson D, Newcorn J, et al. High-dose atomoxetine treatment of ADHD  
34 in youths with limited response to standard doses. *J Am Acad Child Adolesc Psychiatry*.  
35 2007;46(9):1128-37.  
36 [48] Street J, Clark S, Gannon K, et al. Olanzapine treatment of psychotic and behavioral  
37 symptoms in patients with Alzheimers disease in nursing care facilities. *Arch Gen Psychiatry*.  
38 2000;57:968-76.  
39 [49] Kamijima K, Kuboki T, Kumano H, et al. A placebo-controlled, randomized withdrawal  
40 study of sertraline for panic disorder in Japan. *International Clinical Psychopharmacology*.  
41 2005;20:265-73.  
42 [50] Tohen M, Calabrese J, Sachs G, et al. Randomized, placebo-controlled trial of olanzapine  
43 as maintenance therapy in patients with bipolar I disorder responding to acute treatment with  
44 olanzapine. *Am J Psychiatry*. 2006;163(2):247-56.  
45  
46  
47  
48  
49  
50  
51  
52  
53  
54  
55  
56  
57  
58  
59  
60

Table 1. Description of included studies

|                                        | N   | Modal trial completion or article publication year | Average (median) number of publications per trial <sup>a</sup> | Average years from trial completion to article publication | Average (median) trial length in weeks | Maximum trial length in weeks | Number of drug treated participants (% as reported in summaries) | Total no. participants |
|----------------------------------------|-----|----------------------------------------------------|----------------------------------------------------------------|------------------------------------------------------------|----------------------------------------|-------------------------------|------------------------------------------------------------------|------------------------|
| <b>Aripiprazole</b>                    |     |                                                    |                                                                |                                                            |                                        |                               |                                                                  |                        |
| Trial summary                          | 28  | 2006                                               | 0.62 (1)                                                       | 2.6                                                        | 20.8 (8)                               | 140                           | 5,809                                                            | 9,935                  |
| Journal article                        | 28  | 2009                                               | --                                                             | --                                                         | 10.7 (8)                               | 52                            | 5,696 (98)                                                       | 9,728                  |
| Unpublished trial summary <sup>b</sup> | 21  | 2003                                               | --                                                             | --                                                         | 29.9 (26)                              | 94                            | 6,896                                                            | 8,112                  |
| <b>Olanzapine</b>                      |     |                                                    |                                                                |                                                            |                                        |                               |                                                                  |                        |
| Trial summary                          | 33  | 2000                                               | 1.78 (1)                                                       | 2.7                                                        | 26.5 (24)                              | 78                            | 8,515                                                            | 12,136                 |
| Journal article                        | 33  | 2002                                               | --                                                             | --                                                         | 16.8 (6)                               | 78                            | 8,225 (97)                                                       | 11,932                 |
| Unpublished trial summary              | 18  | 2005                                               | --                                                             | --                                                         | 18.7 (19)                              | 48                            | 3,120                                                            | 4,997                  |
| <b>Ziprasidone</b>                     |     |                                                    |                                                                |                                                            |                                        |                               |                                                                  |                        |
| Trial summary                          | 8   | 2005                                               | 0.79 (0)                                                       | 3.8                                                        | 17.1 (12)                              | 60                            | 910                                                              | 1,399                  |
| Journal article                        | 8   | 2007                                               | --                                                             | --                                                         | 10.5 (10)                              | 27                            | 910 (100)                                                        | 1,399                  |
| Unpublished trial summary              | 21  | 2008                                               | --                                                             | --                                                         | 38.4 (12)                              | 320                           | 3,268                                                            | 4,459                  |
| <b>Atomoxetine</b>                     |     |                                                    |                                                                |                                                            |                                        |                               |                                                                  |                        |
| Trial summary                          | 31  | 2005                                               | 1.76 (1)                                                       | 2.2                                                        | 35.9 (18)                              | 181                           | 4,313                                                            | 7,094                  |
| Journal article                        | 31  | 2007                                               | --                                                             | --                                                         | 16.7 (10)                              | 97                            | 4,138 (96)                                                       | 6,975                  |
| Unpublished trial summary              | 20  | 2006                                               | --                                                             | --                                                         | 35.7 (24)                              | 104                           | 3,640                                                            | 4,469                  |
| <b>Duloxetine</b>                      |     |                                                    |                                                                |                                                            |                                        |                               |                                                                  |                        |
| Trial summary                          | 35  | 2005                                               | 4.69 (3)                                                       | 2                                                          | 27.1 (13)                              | 103                           | 14,185                                                           | 18,334                 |
| Journal article                        | 35  | 2007                                               | --                                                             | --                                                         | 22.8 (13)                              | 103                           | 14,185 (100)                                                     | 18,334                 |
| Unpublished trial summary              | 13  | 2004                                               | --                                                             | --                                                         | 24.2 (15)                              | 62                            | 2,115                                                            | 3,413                  |
| <b>Sertraline</b>                      |     |                                                    |                                                                |                                                            |                                        |                               |                                                                  |                        |
| Trial summary                          | 7   | 2003                                               | 1.53 (1)                                                       | 2.9                                                        | 37.7 (22)                              | 128                           | 2,147                                                            | 2,326                  |
| Journal article                        | 7   | 2005                                               | --                                                             | --                                                         | 22.9 (22)                              | 52                            | 2,147 (100)                                                      | 2,326                  |
| Unpublished trial summary              | 9   | 2001                                               | --                                                             | --                                                         | 15.4 (10)                              | 36                            | 1,045                                                            | 1,541                  |
| <b>All Drugs</b>                       |     |                                                    |                                                                |                                                            |                                        |                               |                                                                  |                        |
| Trial summary                          | 142 | 2005                                               | 2 (1)                                                          | 2.5                                                        | 27.8 (12)                              | 181                           | 35,879                                                           | 51,224                 |
| Journal article                        | 142 | 2007                                               | --                                                             | --                                                         | 16.7 (11)                              | 103                           | 35,269 (98)                                                      | 50,694                 |
| Unpublished trial summary              | 102 | 2006                                               | --                                                             | --                                                         | 28.8 (16)                              | 320                           | 20,084                                                           | 26,992                 |

<sup>a</sup>Average and median number of publications reflect all publications listed on the trial summary cover page, including stand-alone journal articles, meta-analyses, sub-set analyses, and conference abstracts.

<sup>b</sup>Unpublished trial summary refers to clinical trial summaries posted on the publicly accessible clinicalstudyresults.org website, but having no associated stand-alone journal article.



Table 2. Number of serious adverse events (SAEs) reported in trial summaries and journal articles for drug-treated participants

|                                               | Number (%) of studies that report the number of SAEs <sup>a</sup> | Number of SAEs (% as reported in associated trial summaries) | Number of SAEs per patient treated <sup>b</sup> |
|-----------------------------------------------|-------------------------------------------------------------------|--------------------------------------------------------------|-------------------------------------------------|
| <b>Aripiprazole</b>                           |                                                                   |                                                              |                                                 |
| Trial summary (n=28)                          | 26 (92.9)                                                         | 364                                                          | 0.06                                            |
| Journal article (n=28)                        | 27 (96.4)                                                         | 417 (114.6%)                                                 | 0.07                                            |
| Unpublished trial summary <sup>c</sup> (n=21) | 20 (95.2)                                                         | 504                                                          | 0.07                                            |
| <b>Olanzapine</b>                             |                                                                   |                                                              |                                                 |
| Trial summary (n=33)                          | 28 (84.8)                                                         | 544                                                          | 0.06                                            |
| Journal article (n=33)                        | 11 (33.3)                                                         | 66 (12.1%)                                                   | 0.008                                           |
| Unpublished trial summary (n=18)              | 17 (94.4)                                                         | 302                                                          | 0.10                                            |
| <b>Ziprasidone</b>                            |                                                                   |                                                              |                                                 |
| Trial summary (n=8)                           | 7 (87.5)                                                          | 117                                                          | 0.13                                            |
| Journal article (n=8)                         | 5 (62.5)                                                          | 53 (45.3%)                                                   | 0.06                                            |
| Unpublished trial summary (n=21)              | 21 (100.0)                                                        | 446                                                          | 0.14                                            |
| <b>Atomoxetine</b>                            |                                                                   |                                                              |                                                 |
| Trial summary (n=31)                          | 25 (80.6)                                                         | 88                                                           | 0.02                                            |
| Journal article (n=31)                        | 14 (45.2)                                                         | 13 (14.8%)                                                   | 0.003                                           |
| Unpublished trial summary (n=20)              | 17 (85.0)                                                         | 35                                                           | 0.01                                            |
| <b>Duloxetine</b>                             |                                                                   |                                                              |                                                 |
| Trial summary (n=35)                          | 32 (91.4)                                                         | 453                                                          | 0.03                                            |
| Journal article (n=35)                        | 27 (77.1)                                                         | 349 (77%)                                                    | 0.02                                            |
| Unpublished trial summary (n=13)              | 12 (92.3)                                                         | 117                                                          | 0.06                                            |
| <b>Sertraline</b>                             |                                                                   |                                                              |                                                 |
| Trial summary (n=7)                           | 7 (100.0)                                                         | 42                                                           | 0.02                                            |
| Journal article (n=7)                         | 2 (28.6)                                                          | 16 (38.1%)                                                   | 0.007                                           |
| Unpublished trial summary (n=9)               | 8 (88.9)                                                          | 19                                                           | 0.02                                            |
| <b>All Drugs</b>                              |                                                                   |                                                              |                                                 |
| Trial summary (n=142)                         | 125 (88.0)                                                        | 1,608                                                        | 0.05                                            |
| Journal article (n=142)                       | 85 (59.9)                                                         | 914 (56.8%)                                                  | 0.03                                            |
| Unpublished trial summary (n=102)             | 95 (93.1)                                                         | 1,423                                                        | 0.07                                            |

<sup>a</sup>The figures in this column indicate those publications that reported the number of SAEs that occurred. Some publications contained no statement about the occurrence of SAEs or contained an ambiguous statement without specifying the actual number of SAEs, such as “No SAEs thought to be related to study medication occurred.”

<sup>b</sup>The numerator equals the number of events; the denominator equals the total number of drug-treated participants, as reported in Table 1.

<sup>c</sup>Unpublished trial summary refers to clinical trial summaries posted on the publicly accessible clinicalstudyresults.org website, but having no associated stand-alone journal article.

Table 3. Number of deaths, suicide- and homicide-related events, and psychiatric serious adverse events in drug-treated participants

|                                               | Death                  | Suicide, completed | Suicidal ideation, attempts, injury | Homicidal ideation | New or worsened psychiatric symptoms | Total      |
|-----------------------------------------------|------------------------|--------------------|-------------------------------------|--------------------|--------------------------------------|------------|
| <b>Aripiprazole</b>                           |                        |                    |                                     |                    |                                      |            |
| Trial summary (n=28)                          | 79                     | 1                  | 4                                   | 0                  | 79                                   | 163        |
| Journal article (n=28)                        | 27 (34.2) <sup>a</sup> | 1 (100.0)          | 5 (125.0)                           | 0                  | 66 (83.5)                            | 99 (60.7)  |
| Unpublished trial summary <sup>b</sup> (n=21) | 15                     | 1                  | 10                                  | 0                  | 92                                   | 118        |
| <b>Olanzapine</b>                             |                        |                    |                                     |                    |                                      |            |
| Trial summary (n=33)                          | 50                     | 9                  | 18                                  | 0                  | 85                                   | 162        |
| Journal article (n=33)                        | 19 (38.0)              | 1 (11.1)           | 4 (22.2)                            | 0                  | 14 (16.5)                            | 38 (23.5)  |
| Unpublished trial summary (n=18)              | 7                      | 3                  | 21                                  | 1                  | 95                                   | 127        |
| <b>Ziprasidone</b>                            |                        |                    |                                     |                    |                                      |            |
| Trial summary (n=8)                           | 0                      | 1                  | 13                                  | 1                  | 30                                   | 45         |
| Journal article (n=8)                         | 0 (0)                  | 1 (100.0)          | 5 (38.5)                            | 1 (100.0)          | 14 (46.7)                            | 20 (44.4)  |
| Unpublished trial summary (n=21)              | 18                     | 1                  | 23                                  | 3                  | 141                                  | 186        |
| <b>Atomoxetine</b>                            |                        |                    |                                     |                    |                                      |            |
| Trial summary (n=31)                          | 0                      | 0                  | 7                                   | 0                  | 6                                    | 13         |
| Journal article (n=31)                        | 0                      | 0                  | 0 (0)                               | 0                  | 0 (0)                                | 0 (0)      |
| Unpublished trial summary (n=20)              | 1                      | 0                  | 5                                   | 0                  | 5                                    | 11         |
| <b>Duloxetine</b>                             |                        |                    |                                     |                    |                                      |            |
| Trial summary (n=35)                          | 11                     | 4                  | 40                                  | 0                  | 27                                   | 82         |
| Journal article (n=35)                        | 11 (100.0)             | 4 (100.0)          | 33 (82.5)                           | 0                  | 21 (77.8)                            | 69 (84.1)  |
| Unpublished trial summary (n=13)              | 3                      | 0                  | 10                                  | 0                  | 20                                   | 33         |
| <b>Sertraline</b>                             |                        |                    |                                     |                    |                                      |            |
| Trial summary (n=7)                           | 11                     | 0                  | 5                                   | 0                  | 11                                   | 27         |
| Journal article (n=7)                         | 0 (0)                  | 0                  | 0 (0)                               | 0 (0)              | 0 (0)                                | 0 (0)      |
| Unpublished trial summary (n=9)               | 1                      | 0                  | 10                                  | 1                  | 4                                    | 16         |
| <b>All Drugs</b>                              |                        |                    |                                     |                    |                                      |            |
| Trial summary (n=142)                         | 151                    | 15                 | 87                                  | 1                  | 238                                  | 492        |
| Journal article (n=142)                       | 57 (37.7)              | 7 (46.7)           | 47 (54.0)                           | 1 (100.0)          | 115 (48.3)                           | 227 (46.1) |
| Unpublished trial summary (n=102)             | 45                     | 5                  | 79                                  | 5                  | 357                                  | 491        |

<sup>a</sup>Percent as reported in associated trial summaries.

<sup>b</sup>Unpublished trial summary refers to clinical trial summaries posted on the publicly accessible clinicalstudyresults.org website, but having no associated stand-alone journal article.

Table 4. Percentage of trial summary -journal article pairs that report serious adverse event (SAE) data consistently across sources

| Summary-Article Pairs | Number of SAEs            |                                 | Description of SAEs       |
|-----------------------|---------------------------|---------------------------------|---------------------------|
|                       | Consistent across sources | > 20% difference across sources | Consistent across sources |
| Aripiprazole (n=28)   | 67.9                      | 25.0                            | 28.6                      |
| Olanzapine (n=33)     | 27.3                      | 72.7                            | 30.3                      |
| Ziprasidone (n=8)     | 37.5                      | 37.5                            | 37.5                      |
| Atomoxetine (n=31)    | 54.8                      | 45.2                            | 42.0                      |
| Duloxetine (n=35)     | 62.9                      | 37.1                            | 31.4                      |
| Sertraline (n=7)      | 28.6                      | 71.4                            | 14.3                      |
| All Drugs (n=142)     | 50.7                      | 49.2                            | 32.4                      |

Table 5. Explanations for Discrepant Reporting of SAEs between Journal Articles and Trial Summaries

| General explanation for discrepant reporting | Specific explanation for discrepant reporting                                                   | Example                                                                                                                                                                                                                                                                                                                                                                                                                                                                                                         |
|----------------------------------------------|-------------------------------------------------------------------------------------------------|-----------------------------------------------------------------------------------------------------------------------------------------------------------------------------------------------------------------------------------------------------------------------------------------------------------------------------------------------------------------------------------------------------------------------------------------------------------------------------------------------------------------|
| Difference in study length or phase reported | Reporting only one phase of a multi-phase trial                                                 | In atomoxetine trial 6962, the journal article cites zero SAEs in the 10-week acute phase [44]; three SAEs that were thought to be related to study medication (suicidal ideation, aggression, and self-injurious behavior) occurred in the 22-week extension phase reported in the trial summary.                                                                                                                                                                                                              |
| Difference in reporting criteria used        | Not reporting SAEs that occurred during follow-up                                               | In olanzapine trial 3045, the journal article stated “there were no deaths during the study,” but failed to cite the death that occurred within 30 days after the study [45].                                                                                                                                                                                                                                                                                                                                   |
| Difference in reporting criteria used        | Not reporting SAEs that were presumed to be unrelated to the study drug                         | In these cases, journal articles would either make no mention at all of SAEs or would include a statement implying that SAEs did occur but without providing an exact figure, such as “No patients in either treatment group had a serious adverse event that was considered study medication related” [46].                                                                                                                                                                                                    |
| Apparent selective reporting of data         | Not reporting SAEs that were not statistically significantly different between treatment groups | In atomoxetine trial 5831, two SAEs thought to be “unlikely but possibly related” to the study drug were unreported in the associated journal article [47].                                                                                                                                                                                                                                                                                                                                                     |
| Apparent selective reporting of data         | Omissions of SAE data                                                                           | In olanzapine trial 1032, 28 SAEs occurred in the randomized phase on which the journal article presents results. The journal article, however, contains no statement about SAE occurrence presumably because, as the trial summary indicates, there were no statistically significant differences in SAEs between treatment groups [48].                                                                                                                                                                       |
| Apparent selective reporting of data         | Omissions of SAE data                                                                           | In sertraline trial 1060, the trial summary cites 5 SAEs in drug-treated participants, one of which occurred in the open-label phase and was thought by investigators to be related to the study drug. The journal article reports on the full length of the trial (open and double-blind phases), but only includes this statement related to SAEs: “No subjects had serious adverse events related to study treatment in either treatment group <i>during the double-blind phase</i> ” [49] [emphasis added]. |
| Apparent selective reporting of data         | Omissions of SAE data                                                                           | In olanzapine trial 2354, the journal article reports a lower number of SAEs than cited for the same study phase in the trial summary, and describes “the majority” of SAEs as “worsening of the illness” [50]. The trial summary reports a higher incidence of SAEs and more precisely details the events as suicidal ideation, suicide attempt, mania, and so on.                                                                                                                                             |

1  
2  
3  
4 Figure 1. Clinical trial summary search results  
5  
6  
7  
8  
9  
10  
11  
12  
13  
14  
15  
16  
17  
18  
19  
20  
21  
22  
23  
24  
25  
26  
27  
28  
29  
30  
31  
32  
33  
34  
35  
36  
37  
38  
39  
40  
41  
42  
43  
44  
45  
46  
47  
48  
49

---

For peer review only

Differences in Reporting Serious Adverse Events in Industry Sponsored Clinical Trial Registries and Journal Articles on Antidepressant and Antipsychotic Drugs - A Cross-sectional Study

Shannon Hughes, Ph.D.

Assistant Professor

School of Social Work

Colorado State University

Fort Collins, Colorado, USA 80523

David Cohen, Ph.D.

Professor ~~and Marjorie Crump Chair in Social Welfare~~

Luskin School of Public Affairs

University of California, Los Angeles

Los Angeles, California, USA 90095

Rachel Jaggi, B.A.

Research Analyst

University of Utah

Salt Lake City, Utah, USA 84112

**Corresponding Author:**

Shannon Hughes, Colorado State University, School of Social Work, 1586 Campus Delivery, Fort Collins, CO, USA 80523

Phone: (970) 491-5654

Fax: (970) 491-7280

Email: [Shannon.hughes@colostate.edu](mailto:Shannon.hughes@colostate.edu)

The Corresponding Author has the right to grant on behalf of all authors and does grant on behalf of all authors, an exclusive licence (or non exclusive for government employees) on a worldwide basis to the BMJ Publishing Group Ltd to permit this article (if accepted) to be published in BMJ editions and any other BMJ PGL products and sublicences such use and exploit all subsidiary rights, as set out in our licence.

## ABSTRACT

**Objective:** To examine the degree of concordance in reporting serious adverse events (SAEs) from [psychotropic-antidepressant and antipsychotic](#) drug trials among journal articles and clinical trial summaries, and to categorize types of discrepancies.

**Design:** Cross-sectional study of summaries of all antidepressant and antipsychotic trials included in an online trial registry and their first associated stand-alone journal articles.

**Setting:** Clinicalstudyresults.org, sponsored by Pharmaceutical Research and Manufacturers of America; clinicaltrials.gov, administered by the US National Institutes of Health.

**Main outcome measure:** Three coders extracted data on the numbers and types of SAEs.

**Results:** 244 trial summaries for six antidepressant and antipsychotic drugs were retrieved, 142 (58.2%) listing an associated article. Of 1,608 SAEs in drug-treated participants according to trial summaries, 694 (43.2%) did not appear in associated articles. Nearly 60% of SAEs counted in articles and 41% in trial summaries had no description. Most cases of death (62.3%) and suicide (53.3%) were not reported in articles. Half or more of the 142 pairs were discordant in reporting the number (49.3%) or description (67.6%) of SAEs. These discrepancies resulted from journal articles' 1) omission of complete SAE data, 2) reporting acute phase study results only, and 3) more restrictive reporting criteria. Trial summaries with zero SAE were 2.35 (95% confidence interval, 1.58 to 3.49;  $P < 0.001$ ) times more likely to be published with no discrepancy in their associated journal article. Since clinicalstudyresults.org was removed from the Internet in 2011, only 7.8% of retrieved trial summaries appear with results on clinicaltrials.gov.

**Conclusions:** Substantial discrepancies exist in SAE data found in journal articles and registered summaries of antidepressant and antipsychotic drug trials. ~~The t~~wo main scientific sources accessible to clinicians and researchers are limited by incomplete, ambiguous, and inconsistent reporting. Access to complete and accurate data from clinical trials of drugs currently in use remains a pressing concern.

## ARTICLE SUMMARY

**Strengths and limitations of this study**

- Published journal articles from antidepressant and antipsychotic drug trials report substantially fewer serious adverse events than associated clinical trial summaries posted by industry trial sponsors on a previously active online registry.
- Our findings of inconsistencies and ambiguities in serious adverse event reporting in both journal articles and trial summaries suggest that registries might not provide meaningfully improved access to complete and transparent clinical trial data.
- The registry from which we retrieved trial summaries has since been removed from the Internet and most trial summaries were not transferred with results to [clinicaltrials.gov](http://clinicaltrials.gov), making our analysis a unique examination of data that has been lost or scattered.
- We examined only the first stand-alone journal article associated with each trial summary, so it is possible that additional harms outcomes and longer-term outcomes absent from our sample of journal articles were reported in subsequent articles. Nevertheless, clear trends of incomplete reporting were apparent between journal article and trial summary sources.



## INTRODUCTION

Publication bias and concerns regarding the integrity of the medical treatment knowledge base have led to various mechanisms, such as publicly accessible clinical trial registries, to promote transparent and complete reporting of clinical trial results [1, 2]. As the next most accessible source of drug information after published articles, clinical trial summaries available in online trial registries might contribute to improved evidence synthesis since they are supposed to provide an inclusive synopsis of both positive and negative results [3, 4]. In this study we compare serious adverse events (SAEs) found in industry-funded antipsychotic and antidepressant drug trial summaries posted by trial sponsors on an online trial registry, with SAEs found in published journal articles reporting on the same trials.

SAEs by definition result in death, hospitalization or significant disability and are therefore particularly important to report from a clinical trial because of their potential impacts on treatment decision-making and patient safety. International Conference on Harmonization (ICH) guidelines state that SAEs “deserve special attention” relative to other types of adverse effects, including providing individual-level patient detail and narrative for each SAE in clinical trial reports submitted to regulatory agencies [5]. Regulatory agencies in the United States and across Europe require trial sponsors to immediately report unexpected or life-threatening SAEs [6, 7]. However, the extent to which SAEs are then reported in outlets for clinicians, researchers, and the public is unknown, though evidence suggests incomplete and ambiguous reporting of harms-related data [8-10]. Recent settlements resulting from state and federal lawsuits in the United States against pharmaceutical manufacturers for minimizing or concealing drug harms, further highlight the need for increased diligence in discerning what important harm-related drug information might remain unknown or distorted in scientific outlets for reporting clinical trial

1  
2  
3 results [11-13]. [While previous research has demonstrated that harms data are less completely](#)  
4 [reported in journal articles than clinical trial summaries, these studies provide primarily](#)  
5 [quantitative counts of reporting practices \[8-10\]. The present analysis seeks to elaborate the](#)  
6 [nature of quantitative and qualitative differences in SAE reporting, and possible explanations for](#)  
7 [reporting discrepancies.](#)  
8  
9  
10  
11  
12  
13  
14

15 Antipsychotic and antidepressant drugs — which rank among the 10 highest-selling drug  
16 classes in the U.S. and the world [14, 15] — are mainstay treatments in psychiatry and  
17 prescribed for myriad indicated and off-label, psychiatric and non-psychiatric uses [16, 17].  
18  
19 Journal publications, ~~and~~ clinical trial summaries posted on trial registries, [and data from](#)  
20 [regulatory agencies such as the U.S. Food and Drug Administration \(FDA\)](#) currently represent  
21 the primary information sources for clinicians and decision-makers regarding the safety and  
22 effectiveness of drug treatments. In contrast to substantially lengthier accounts of trials found in  
23 clinical study reports submitted to regulatory agencies, clinical trial summaries are abbreviated,  
24 concise descriptions of trials' background, methodology, and positive and negative results. ~~and,~~  
25 ~~s~~Similar to clinical study reports, ~~they are prepared~~ [structured](#) according to templates described  
26 in the ICH *Guidelines for Industry: Structure and Content of Clinical Study Reports* [5], [though](#)  
27 [their level of detail can vary substantially.](#) Using the clinical trial summaries for all trials of these  
28 drugs posted by industry sponsors on [clinicalstudyresults.org](#), we aimed to 1) count and describe  
29 SAEs reported in trial summaries and, as applicable, their associated peer-reviewed journal  
30 articles, 2) assess the consistency of SAE reporting between pairs of trial summaries and  
31 associated journal articles, and 3) categorize possible explanations for discrepant reporting.  
32  
33  
34  
35  
36  
37  
38  
39  
40  
41  
42  
43  
44  
45  
46  
47  
48  
49  
50  
51  
52

## 53 METHODS

### 54 Data Sources

1  
2  
3  
4  
5  
6  
7  
8  
9  
10  
11  
12  
13  
14  
15  
16  
17  
18  
19  
20  
21  
22  
23  
24  
25  
26  
27  
28  
29  
30  
31  
32  
33  
34  
35  
36  
37  
38  
39  
40  
41  
42  
43  
44  
45  
46  
47  
48  
49  
50  
51  
52  
53  
54  
55  
56  
57  
58  
59  
60

Clinical trials summaries were retrieved from [clinicalstudyresults.org](http://clinicalstudyresults.org), the former online public registry sponsored by the Pharmaceutical Research and Manufacturers of America (PhRMA). Published journal articles were identified using the bibliography listed on the cover page of each trial summary.

### *2.1.1 Clinical trial summaries*

The [clinicalstudyresults.org](http://clinicalstudyresults.org) registry was established in 2005 by PhRMA as a single repository for pharmaceutical manufacturers to post result summaries of their sponsored clinical trials. At the time, the federally funded [clinicaltrials.gov](http://clinicaltrials.gov), established in 2000 and administered by the U.S. National Institutes of Health, required manufacturers to register only the existence of their trials. According to PhRMA guidelines, complete results of all hypothesis-testing clinical trials completed after 2002 for products approved for marketing in the United States were to be submitted to its registry within one year after completion of the trial, and references to articles published in peer-reviewed journals added to the trial summary as soon as they were published [18].

In May 2011, we retrieved all Phase II, III, and IV clinical trial summaries (n=329) for all nine drugs within the antidepressant and antipsychotic classes listed on [clinicalstudyresults.org](http://clinicalstudyresults.org). We excluded three drugs (desvenlafaxine, quetiapine, and venlafaxine) with registered trials but no or few posted trial summaries. For the remaining six drugs (n=254 trial summaries) we retained the summaries with trial completion dates on or before 2008, allowing at least 2.5 years for a trial to reach publication in the peer-reviewed literature (see Appendix Table 1). This resulted in 244 (74%) clinical trial summaries for six drugs from three manufacturers: aripiprazole (Abilify, Bristol-Myers Squibb), atomoxetine (Strattera, Eli Lilly), duloxetine (Cymbalta, Eli Lilly), olanzapine (Zyprexa, Eli Lilly), sertraline (Zoloft, Pfizer), and

ziprasidone (Geodon, Pfizer). Trial summaries averaged 18 pages in length (range: 3 to 147).

Supplementary File 1 provides a trial summary illustrating the typical format of the documents in this sample. Trial summaries include both pre-marketing studies that were sent to regulatory agencies for drug approval and post-marketing studies for new indications, additional outcomes, and long-term follow-up.

### *Journal articles*

~~Using We used~~ the bibliography listed on the cover page of each trial summary, ~~we counted a total of 496 listed publications (an average of two publications per trial, with an average time to publication of 2.5 years), from which we to~~ retrieved the earliest journal article reporting on the full trial. ~~From the total we excluded 261 (52.6%) sub-set analyses (i.e., reports on a sub-set of the total sample based on a shared characteristic, such as gender), meta-analyses, and conference abstracts. Of the 244 trial summaries, 142 (58.2%) listed an associated stand-alone journal article.~~ We emailed and telephoned the medical communications, clinical trials, or customer relations department of each manufacturer of the included drugs to inquire about the completeness of the list of trial summaries and journal articles posted on clinicalstudyresults.org. No representative from any manufacturer could confirm completeness of the posted lists nor provide a current list of all clinical trials and journal publications for the respective drugs. Representatives directed us to visit clinicaltrials.gov to view current and completed trials, and PubMed for a list of publications. We then attempted to manually search PubMed to match possible additional publications with the trial summaries, but the absence of trial identification numbers in journal articles made it extremely difficult to crosscheck and match all sources reliably. ~~These additional efforts, therefore, did not affect the final sample size, which consisted~~

1  
2  
3 of 142 trial summary-journal article pairs listed on [clinicalstudyresults.org](http://clinicalstudyresults.org) and an additional 102  
4  
5 trial summaries from the registry with no associated journal article (see Figure 1).  
6  
7

#### 8 Data Extraction

9  
10 We employed double data extraction. One coder extracted the number and exact  
11 description of SAEs reported to occur in drug-treated participants from the *Results* section of  
12 each of the 244 trial summaries and 142 journal articles. For multi-phase trials, we tallied the  
13 SAEs occurring in each phase. The number of patients experiencing SAEs was counted in the  
14 few cases where the number of events was not provided, therefore underestimating the actual  
15 number of SAEs. We also extracted from each source the trial start and completion year, article  
16 publication date, study length, sample size, targeted indication, and consistency of reporting  
17 SAEs (see explanation below). A second coder independently extracted these data from a 50%  
18 random sample of trial summaries and articles for three of the six drugs. A third coder repeated  
19 the same process for the other three drugs. The values obtained by the second and third coders  
20 were compared to those obtained by the first. Any discrepancies were resolved by consensus.  
21 Coding for most reports and articles was straightforward and few disagreements in recordings  
22 between coders were found.  
23  
24  
25  
26  
27  
28  
29  
30  
31  
32  
33  
34  
35  
36  
37  
38  
39

40  
41 We evaluated the consistency of the number and description of SAEs occurring in drug-  
42 treated participants reported between each trial summary and its associated article (142 pairs).  
43 The *number* of SAEs was considered inconsistent if (1) reported numbers differed between the  
44 two sources (e.g., aripiprazole trial CN138-008: trial summary cited 7, journal article 6, SAEs),  
45 (2) one source reported the number of SAEs while the other contained no or an ambiguous  
46 statement about their occurrence; or (3) the journal article did not report the trial phase in which  
47 SAEs did occur according to the trial summary (e.g., ziprasidone trial 1006: in a 60-week multi-  
48  
49  
50  
51  
52  
53  
54  
55  
56  
57  
58  
59  
60

1  
2  
3 phase study with 8 SAEs reported in the summary, the article reports findings from the 8-week  
4 acute phase with zero SAEs). The *description* of SAEs was considered inconsistent if only one  
5 source described the events (e.g., duloxetine trial 6091: the summary describes 1 SAE as an  
6 intentional overdose, the article omits the description but accurately reports the number), or if  
7 one source less completely described the events than the other source (e.g., duloxetine trial 8601:  
8 the summary lists one death from suicide as well as other SAEs related to psychiatric worsening,  
9 but the article mentions only the suicide). Sources were considered consistent if both reported the  
10 number or description of SAEs identically, or if neither reported such information. In each  
11 instance of discrepant reporting, we [performed an in-depth inductive analysis involving a](#)  
12 [carefully reviewed review of](#) the trial summary and journal article to [clarify-identify a possible](#)  
13 [explanation for the form of the inconsistency/discrepancy. We then grouped the emerging](#)  
14 [patterns, which resulted in three categories \(described in the results section\): differences in study](#)  
15 [length or phase reported, differences in reporting criteria used, and apparent selective reporting](#)  
16 [of SAE data. -and then categorized our findings. Discrepancies were only assigned to the latter](#)  
17 [category after ruling out the other two explanations. No additional categories to explain](#)  
18 [discrepant reporting emerged from the analysis.](#)

#### 41 Analysis

42  
43 We used descriptive statistics to summarize quantitative variables related to study  
44 characteristics and frequencies for categorical variables. We calculated the number of SAEs per  
45 patient treated for each drug by dividing the number of SAEs reported in trial summaries and  
46 journal articles, respectively, by the total number of drug-treated participants.

47  
48 We extracted exact descriptions of SAEs and then categorized them as: behavioral or  
49 cognitive, physical, no description provided, and unspecified (including overdose, dependence,  
50  
51  
52  
53  
54  
55  
56  
57  
58  
59  
60

1  
2  
3 death or hospitalization for unspecified reasons, and accidental injury). We further counted the  
4  
5 number of SAEs reported as death, suicide, suicide attempt, homicidal ideation, and new or  
6  
7 worsened psychiatric symptoms.  
8  
9

10 We calculated risk ratios to test the likelihood of trial summaries reporting zero SAEs to  
11  
12 be published as stand-alone journal articles in a manner congruent with the summaries, compared  
13  
14 to trial summaries reporting  $\geq 1$  SAEs. Risk ratios were calculated with 95% confidence intervals  
15  
16 and Pearson's chi-square analysis using PASW Statistics, version 18 software [19].  
17  
18

## 19 RESULTS

### 20 Search Results and Sample Selection

21  
22 Using the bibliography listed on the cover page of each trial summary, we counted a total  
23  
24 of 496 listed publications (an average of two publications per trial, with an average time to  
25  
26 publication of 2.5 years), from which we retrieved the earliest journal article reporting on the full  
27  
28 trial. From the total we excluded 261 (52.6%) sub-set analyses (i.e., reports on a sub-set of the  
29  
30 total sample based on a shared characteristic, such as gender), meta-analyses, and conference  
31  
32 abstracts. Of the 244 trial summaries, 72 (29.5%) listed no publication of any kind, 30 (12.3%)  
33  
34 listed only one or more of the excluded publication types, and 142 (58.2%) listed at least one  
35  
36 associated stand-alone journal article (see Figure 1). The final sample consisted of 142 trial  
37  
38 summary-journal article pairs listed on clinicalstudyresults.org and an additional 102 trial  
39  
40 summaries from the registry with no associated journal article.  
41  
42  
43  
44  
45  
46  
47

### 48 Sample Description

49  
50 For each of the six drugs included in this analysis, Table 1 summarizes trial  
51  
52 characteristics as reported in trial summaries, their associated journal articles, and the additional  
53  
54 trial summaries having no associated journal article (referred to as *unpublished trial summary* on  
55  
56  
57  
58  
59  
60

1  
2  
3 all tables and appendices). [Overall, a stand-alone journal article was available for 58.2% of trials](#)  
4 [in this sample, though this varied by drug from a low of 27.6% for trials of ziprasidone to 72.9%](#)  
5 [for trials of duloxetine.](#) Journal articles reported findings for an identical or nearly identical  
6  
7  
8 number of participants as their associated trial summaries. The 102 unpublished summaries,  
9  
10 however, included data on an additional 20,084 drug-treated participants. The median study  
11  
12 length was shorter in journal articles (11 weeks) than in their paired trial summaries (12 weeks)  
13  
14 or unpublished trial summaries (16 weeks).  
15  
16  
17  
18  
19

20 The three antipsychotic drugs (n=129 trial summaries) were being tested for the treatment  
21  
22 of psychotic disorders (56.6% of studies), bipolar disorder or mania (26.4%), or other conditions  
23  
24 (16.2%) such as depressive disorders, Alzheimer's, autism, alcohol dependence, or borderline  
25  
26 personality disorder. The three antidepressant drugs (n=115 trial summaries) were being studied  
27  
28 for the treatment of attention deficit hyperactivity disorder (42.6%), depressive disorders  
29  
30 (34.8%), anxiety disorders (8.7%), or other conditions (14%) such as pain-related disorders or  
31  
32 post-traumatic stress disorder.  
33  
34  
35

### 36 Serious Adverse Events in Trial Summaries

37  
38  
39 Ninety percent of all trial summaries (n=244) reported a precise number of SAEs  
40  
41 occurring in the trial. The 142 trial summaries with an associated journal article reported 1,608  
42  
43 SAEs, and the 102 trial summaries with no associated journal article reported an additional 1,423  
44  
45 SAEs. Table 2 details the total and per patient numbers of SAEs reported in trial summaries for  
46  
47 each drug. Appendix Table 2 lists additional SAEs for the 10 excluded trial summaries with trial  
48  
49 completion dates in 2009 or later.  
50  
51  
52

53 No description was provided for 41% of the SAEs cited in trial summaries (46% and 20%  
54  
55 of SAEs in antipsychotic and antidepressant trials, respectively). An additional 11.6% of SAEs  
56  
57  
58  
59  
60



1  
2  
3 were non-specifically described, such as “accidental injury” in duloxetine trial 1126. When a  
4  
5 specific description was present, we categorized 28.4% of SAEs as behavioral or cognitive and  
6  
7 18.9% as physical. Table 3 details all cases of death, suicide, and new or worsened psychiatric  
8  
9 symptoms for each drug.  
10  
11

### 12 13 Serious Adverse Events in Journal Articles

14  
15 Nearly 40% of journal articles failed to specify the number of SAEs that occurred in the  
16  
17 trial (Table 2), containing either no statement related to SAEs or an ambiguous statement without  
18  
19 an actual number of SAEs, such as sertraline trial 1060: “no subjects had serious adverse events  
20  
21 related to study treatment.” A total of 914 SAEs were reported across the 85 journal articles that  
22  
23 did include specific data on SAE occurrence.  
24  
25

26  
27 Most SAEs (58.9%) reported in journal articles (61% in antipsychotic and 55.5% in  
28  
29 antidepressant trials) had no accompanying description and another 8% were non-specifically  
30  
31 described. Nearly one-fifth (18.9%) of SAEs were behavioral or cognitive in nature and 14.6%  
32  
33 were described as physical. Table 3 shows that one-quarter of SAEs described in journal articles  
34  
35 were categorized as death, suicide, homicidal ideation, or new or worsened psychiatric  
36  
37 symptoms.  
38  
39

### 40 41 Consistency of Reporting in Trial Summary-Journal Article Pairs

42  
43 Just over half (56.8%) of the 1,608 SAEs experienced by drug-treated participants  
44  
45 according to trial summaries (n=142) were also reported in associated journal articles. This  
46  
47 proportion varied widely between the drugs, from 14.8% of SAEs in atomoxetine trials to  
48  
49 114.6% in aripiprazole trials (see Table 2). The number of SAEs per patient for most drugs were  
50  
51 lower in articles (0.03, range: 0.003 - 0.07) than in associated summaries (0.05, range: 0.02 –  
52  
53  
54  
55  
56  
57  
58  
59  
60

1  
2  
3 0.13). Trial summaries with no associated article averaged the highest number of SAEs per  
4  
5 patient (0.07, range: 0.01 – 0.14).  
6  
7

8 Half or more of the 142 trial summary-journal article pairs were discordant in reporting  
9  
10 the number (49.3%) or description (67.6%) of SAEs (Table 4). In half of these pairs, the reported  
11  
12 number of SAEs differed by more than 20% between the two sources.  
13  
14

15 Both journal articles and associated trial summaries failed to describe a substantial  
16  
17 proportion of SAEs. Most cases of death (62.3%) and suicide (53.3%) cited in trial summaries  
18  
19 were not reported in associated journal articles (Table 3).  
20  
21

22 The 34 trial summaries with zero SAEs were 2.35 (95% confidence interval, 1.58 to 3.49;  
23  
24 P<0.001) times as likely to have an associated journal article reporting this data consistently with  
25  
26 the trial summary data as were the 181 summaries with 1 or more SAEs.  
27  
28

### 29 Explanations for Discrepant Reporting 30

31 Seventy (49.3%) of the 142 trial summary-journal article pairs were discrepant in SAE  
32  
33 reporting. Nearly half of these instances might be explained by differences between sources in  
34  
35 the study length or phase being reported (25%, 18/70) or in the reporting criteria used (24.325%,  
36  
37 18/70). Table 5 provides examples of each of these forms of discrepant reporting. Importantly,  
38  
39 while some journal articles appeared to apply more restrictive reporting criteria that might lead to  
40  
41 omitting certain data, the many articles that did report exact SAE numbers often did so regardless  
42  
43 of presumed causality to the study drug. For example, articles and summaries for olanzapine  
44  
45 trials 3131 and 7031 reported all SAEs even though some events were thought to be unrelated to  
46  
47 the study drug. Yet, the article for olanzapine trial 4414 separately details SAEs thought to be  
48  
49 related and unrelated to the drug [20]. Thus, no clear or consistent pattern on SAE reporting  
50  
51 criteria emerged from this sample of journal articles.  
52  
53  
54  
55  
56  
57  
58  
59  
60

Another one-third (~~32.9~~34.3%, 24/70) of discrepancies appear to be simple failures of journal articles to report complete SAE data (see Table 5). In a minority (~~43~~14.3%, 10/70) of cases, however, the journal article provided more precise data or a higher number of SAEs than the trial summary. The article for aripiprazole trial CN138-050, for example, cites 6 SAEs in drug-treated participants [21], while the summary states only that the incidence of SAEs was low.

#### Post Hoc Analysis of Clinical Trial Summaries on [Clinicaltrials.gov](http://Clinicaltrials.gov) Availability

In December 2011, clinicalstudyresults.org was removed from the Internet for unknown reasons. The Internet archive for the website (found here: [Internet archive](http://Internet archive)) suggests that the expansion of other registries made clinicalstudyresults.org seem redundant from industry's perspective [22]. One year after this removal of the registry, we cross-checked our data source by searching for each of the 244 trial summaries on clinicaltrials.gov. (In that database, the U.S. Food and Drug Administration Amendment Act [FDAAA] of 2007 newly mandated trial sponsors to include summary reporting of results for trials that were initiated after or ongoing as of late 2007.) Our search revealed that 139 (57%, range across drugs: 25% - 80%) of the 244 trials were registered on clinicaltrials.gov, but only 15 of these (10.8%, range across drugs: 0% - 39%) had posted study results. In October 2013, nearly two years after the clinicalstudyresults.org takedown, these numbers had only slightly budged, with 19 registered trials now reporting study results. While nearly all (99%) of the trial summaries not currently registered on clinicaltrials.gov have trial start or completion dates prior to 2007, 75% of trial summaries that *are* registered on the website also have pre-2007 trial dates. In the interest of openness and transparency, we created a publicly accessible website ([www.rxarchives.com](http://www.rxarchives.com)) where all 244 trial summaries are posted in pdf format and freely available for download. *fNote*

~~to reviewers: the website, rxarchives.com, will become live at the time of this manuscript's publication]~~

## DISCUSSION

This study demonstrates that a substantially lower number of SAEs appear in published journal articles than registered trial summaries of antidepressant and antipsychotic drug trials, and shows further that both sources for drug information are often inconsistent or ambiguous in SAE reporting. In this study, 43.2% of all SAEs appearing in 142 trial summaries posted on an online registry across six psychotropic drugs were not reported in the first associated stand-alone journal articles listed by the drug's manufacturer. Failure to describe the nature of SAEs was also common in both sources. Given that many consumers of psychotropic drugs take these medications for months or years, that approximately one-quarter of journal articles reported only acute phase results of longer-term trials and that the median study length in trial summaries with an associated journal article (12 weeks) was four weeks shorter than in trials without a journal article highlight an additional attrition of evidence on longer term outcomes.

These findings are congruent with other recent analyses demonstrating more complete outcomes information in registered clinical trial summaries compared to published journal articles [9], although examination of full clinical study reports reveals that both of the latter sources suffer from incomplete reporting of key data [10]. Similar to our results, Riveros and colleagues [9] found that registered trial summaries (99%; present study 90%) more often report data on serious adverse events compared to published articles (63%; present study 60%). However, in an analysis comparing publicly available data in registered clinical trial summaries and journal publications to full clinical study reports submitted to a regulatory agency for drug products, the former sources reported complete information on harms outcomes significantly less

1  
2  
3 (~25%) than clinical study reports (87% of harms outcomes reported completely) [10]. SAEs,  
4  
5 specifically, were reported completely only 51% of the time in journal articles and trial  
6  
7 summaries, and 30% of SAE outcomes were not reported at all in these sources. In their analysis  
8  
9 of full clinical study reports on the influenza drug Tamiflu, Doshi, Jefferson, and Del Mar [3] are  
10  
11 alarmed by the important data remaining unknown to most physicians when clinical trial  
12  
13 information is limited to the published journal literature. The occurrence of SAEs and the  
14  
15 rationales for classifying events as adverse are among many possible discoveries in clinical study  
16  
17 reports that can markedly alter a drug's benefit-to-risk profile. While publication bias of this sort  
18  
19 in the literature has long been acknowledged or suspected [23-25], the present study clarifies the  
20  
21 degree to which such bias distorts the perception of important harms outcomes (i.e., number and  
22  
23 nature of SAEs) across two classes of popularly used psychotropic drugs. Also, this study adds to  
24  
25 the evidence base questioning whether information posted in online clinical trial registries  
26  
27 represents meaningful improvement.  
28  
29  
30  
31  
32  
33

34 For another 102 trials with no associated stand-alone journal article in the present study,  
35  
36 the clinical trial summaries report an additional 1,423 SAEs and represent the only publicly  
37  
38 available data source on these trials. In a recent examination of 585 large randomized trials  
39  
40 registered on clinicaltrials.gov, 29% had no associated journal publication and most (78%) of  
41  
42 those also had no results available on the clinicaltrials.gov registry [26]. Riveros and colleagues  
43  
44 [9] found that 50% of 594 randomly sampled controlled drug trials on clinicaltrials.gov had no  
45  
46 corresponding published article. These findings highlight the necessity for clinicians,  
47  
48 researchers, and decision-makers to consult multiple sources in order to achieve a comprehensive  
49  
50 and more complete appraisal of drugs' safety profile, although again, clinical trial summaries are  
51  
52  
53  
54  
55  
56  
57  
58  
59  
60

1  
2  
3 themselves limited by incomplete reporting [10, 27] and by regulatory policies that require  
4  
5 registration of only recent [1] or new trials [28].  
6  
7

8 Our post hoc analysis further revealed that, while 57% (139/244) of the present sample  
9  
10 of trial summaries are registered on clinicaltrials.gov, only 7.8% (19/244) are available on the  
11  
12 registry with results. Three-quarters of these currently registered trials have trial start or  
13  
14 completion dates prior to 2007, thereby suggesting that actual registration practices on  
15  
16 clinicaltrials.gov may be more inclusive than the minimum requirements set out by the FDAAA.  
17  
18 Access to the full evidence base of drugs currently in use, including recent studies and those  
19  
20 conducted prior to widespread deployment of registries, is essential for sound treatment decision-  
21  
22 making and the assurance of present day patient safety [10, 29], but the important efficacy and  
23  
24 harms information contained in these 225 trials on six psychotropic drugs has been lost or  
25  
26 scattered. As of this writing, Pfizer (sertraline and ziprasidone) and Bristol-Myers Squibb  
27  
28 (aripiprazole) company websites include trial summaries or links to clinicaltrials.gov only for  
29  
30 trials completed or ongoing as of 2007, in accordance with FDAAA guidelines. All clinical trial  
31  
32 summaries included in the present analysis for atomoxetine, duloxetine, and olanzapine are  
33  
34 available on Eli Lilly's company website. Some data, then, have been lost to the evidence base  
35  
36 with the removal of clinicalstudyresults.org, while other data are still available but no longer  
37  
38 accessible through a single repository. The important harms data contained in the present body of  
39  
40 trial summaries provides further support for the recommendation that all ongoing, recent, and  
41  
42 archive drug trials for all new and existing drugs be made available to clinicians and consumers  
43  
44 in a clear and accessible format, including links between all trial-related documents (journal  
45  
46 articles, registry records, trial protocol, and so on) for transparent navigation of each trial  
47  
48 component to the core study [10, 30, 31].  
49  
50  
51  
52  
53  
54  
55  
56  
57  
58  
59  
60

1  
2  
3  
4  
5  
6  
7  
8  
9  
10  
11  
12  
13  
14  
15  
16  
17  
18  
19  
20  
21  
22  
23  
24  
25  
26  
27  
28  
29  
30  
31  
32  
33  
34  
35  
36  
37  
38  
39  
40

The present study has important limitations and strengths. First, although participating industry trial sponsors had posted on their respective websites statements of their commitment to posting all trial results in a timely manner on [clinicalstudyresults.org](http://clinicalstudyresults.org), the completeness and accuracy of trial summaries on [clinicalstudyresults.org](http://clinicalstudyresults.org) could not be verified. However, since our crosscheck of summaries on [clinicaltrials.gov](http://clinicaltrials.gov) revealed that few of these trials were transferred with results, our present analysis provides a glimpse on unique trial evidence that a contemporary standard database fails to capture. Second, only the first stand-alone journal article for each trial was included in this analysis. For trials with multiple publications, additional information on SAEs might appear in subsequent articles. However, this possibility might be slight as the median number of journal articles per trial summary was one, and over half of total articles listed for the six drugs were pooled or sub-set analyses or conference abstracts. We do not know whether the trends observed in the 142 trial summary-journal article pairs would hold for the other 102 trials. Finally, the results of this study cannot be generalized to other drugs and drug classes, but do add to the substantial body of empirical findings demonstrating poor adverse event assessment and reporting practices and a distortion of evidence through selective reporting of industry-sponsored psychotropic drug research [24, 32-35].

41  
42  
43  
44  
45  
46  
47  
48  
49  
50  
51  
52  
53  
54  
55  
56  
57  
58  
59  
60

The integrity of the medical treatment knowledge base preserves sound clinical practice and ensures patient safety. If nearly half of serious adverse events in psychotropic drug research are not reported in journal articles and many more can be found in sources not easily accessed by relevant treatment decision-makers [3, 10, 36], then, without integrating multiple data sources, benefit-to-harm assessments made by groups constructing clinical guidelines and by individual clinicians making prescription decisions are based on incomplete evidence and likely biased toward underestimating risks. Multiple solutions to the grave problem of incomplete reporting of

1  
2  
3 clinical trials have been proposed, and some recent strides have been made. Some suggest  
4  
5 shifting toward public funding and control of drug research in order to produce credible  
6  
7 information accessible and transparent to all stakeholders [37-40]. Some propose to treat failures  
8  
9 to disclose complete knowledge of adverse effects from clinical trials as criminal offenses  
10  
11 requiring criminal prosecution of responsible individuals and companies [41]. At the same time,  
12  
13 ongoing campaigns have gained momentum across the United Kingdom in calling for  
14  
15 pharmaceutical manufacturers to share clinical study reports on all drugs in use [31] and in the  
16  
17 United States for sharing clinical trial datasets with independent scientists [42]. Many agree,  
18  
19 however, that regulatory requirements for registering new and ongoing studies does not  
20  
21 adequately protect the millions of patients currently taking prescription drugs [10, 31], and the  
22  
23 pharmaceutical industry has been slow and resistant to accepting the level of openness that  
24  
25 scientists and the public have been calling for [31, 43].  
26  
27  
28  
29  
30  
31

32 The present findings highlight inconsistencies in harms-related reporting between  
33  
34 published articles and trial registry summaries of psychotropic drugs, and indicate that clinical  
35  
36 decisions regarding drug use may be based on substantially truncated evidence. Policy  
37  
38 discussions in this area should consider to what extent patients who use drugs, clinicians who  
39  
40 prescribe drugs and the public who finance most of their use deserve access to complete and  
41  
42 accurate scientific data from drug trials.  
43  
44  
45  
46  
47  
48  
49  
50  
51  
52  
53  
54  
55  
56  
57  
58  
59  
60



**Competing Interests:** All authors have completed the ICMJE uniform disclosure form at [www.icmje.org/coi\\_disclosure.pdf](http://www.icmje.org/coi_disclosure.pdf) and declare: no support from any organisation for the submitted work; no financial relationships with any organisations that might have an interest in the submitted work in the previous three years; no other relationships or activities that could appear to have influenced the submitted work.

**Funding:** This research received no specific grant from any funding agency in the public commercial or not-for-profit sectors.

**Contributors:** SH and DC conceived the idea of the study and were responsible for the design of the study. SH and RJ were responsible for the acquisition of the data, for undertaking data coding and analysis, and produced the tables. DC also contributed to data coding, and provided critical input into the analysis and interpretation of results. The initial draft of the manuscript was prepared by SH and then circulated repeatedly among all authors for critical revision.

**Data Sharing:** All clinical trial summaries that were analysed in this study have been uploaded by the first author (S.H.) to a publicly-accessible website ([www.rxarchives.com](http://www.rxarchives.com)) for download.

## REFERENCES

- [1] Dickersin K, Rennie D. The evolution of trial registries and their use to assess the clinical trial enterprise. *JAMA*. 2012;307(17):1861-4.
- [2] Turner E. Publication bias, with a focus on psychiatry: Causes and solutions. *CNS Drugs*. 2013;27(6):457-68.
- [3] Doshi P, Jefferson T, Del Mar C. The imperative to share clinical study reports: Recommendations from the Tamiflu experience. *Plos Med*. 2012;9(4):e1001201.
- [4] Doshi P, Jones M, Jefferson T. Rethinking credible evidence synthesis. *BMJ*. 2012;344:d7898.
- [5] Structure and content of clinical study reports E3. 1995 [cited; Available from: [http://www.ich.org/fileadmin/Public\\_Web\\_Site/ICH\\_Products/Guidelines/Efficacy/E3/E3\\_Guideline.pdf](http://www.ich.org/fileadmin/Public_Web_Site/ICH_Products/Guidelines/Efficacy/E3/E3_Guideline.pdf)]
- [6] Guidance for industry and investigators: Safety reporting requirements for INDs and BA/BE studies. 2012 [cited; Available from: <http://www.fda.gov/downloads/Drugs/GuidanceComplianceRegulatoryInformation/Guidances/UCM227351.pdf>]
- [7] Reporting requirements of individual case safety reports (ICSRs) applicable to marketing authorisation holders during the interim period. 2013 [cited; Available from: [http://www.ema.europa.eu/docs/en\\_GB/document\\_library/Regulatory\\_and\\_procedural\\_guideline/2012/05/WC500127657.pdf](http://www.ema.europa.eu/docs/en_GB/document_library/Regulatory_and_procedural_guideline/2012/05/WC500127657.pdf)]
- [8] Earley A, Lau J, Uhling K. Haphazard reporting of deaths in clinical trials: A review of cases of ClinicalTrials.gov records and matched publications - a cross-sectional study. *BMJ Open*. 2013;3:e001963.

- 1  
2  
3 [9] Riveros C, Dechartes A, Perrodeau E, Haneef R, Boutron I, Revaud P. Timing and  
4 completeness of trial results posted at Clinicaltrials.gov and published in journals. *Plos Med*.  
5 2013;10(12):e1001566.  
6  
7 [10] Wieseler B, Wolfram N, McGauran N, Kerekes MF, Vervolgyi V, Kohlepp P, et al.  
8 Completeness of reporting of patient-relevant clinical trial outcomes: Comparison of unpublished  
9 clinical study reports with publicly available data. *Plos Med*. 2013;10(10):e1001526.  
10 [11] Thomas K. J.&J. fined \$1.2 billion in drug case. *New York Times* 2012 April 12, 2012  
11 [cited; Available from: [http://www.nytimes.com/2012/04/12/business/drug-giant-is-fined-1-2-](http://www.nytimes.com/2012/04/12/business/drug-giant-is-fined-1-2-billion-in-arkansas.html)  
12 [billion-in-arkansas.html](http://www.nytimes.com/2012/04/12/business/drug-giant-is-fined-1-2-billion-in-arkansas.html)  
13  
14 [12] Thomas K, Schmidt M. Glaxo agrees to pay \$3 billion in fraud settlement. *New York*  
15 *Times* 2012 [cited; Available from:  
16 [http://www.nytimes.com/2012/07/03/business/glaxosmithkline-agrees-to-pay-3-billion-in-fraud-](http://www.nytimes.com/2012/07/03/business/glaxosmithkline-agrees-to-pay-3-billion-in-fraud-settlement.html?pagewanted=all)  
17 [settlement.html?pagewanted=all](http://www.nytimes.com/2012/07/03/business/glaxosmithkline-agrees-to-pay-3-billion-in-fraud-settlement.html?pagewanted=all)  
18  
19 [13] Almashat S, Wolfe S. Pharmaceutical industry criminal and civil penalties: An update.  
20 2012 [cited October 21, 2013]; Available from: <http://www.citizen.org/documents/2073.pdf>  
21 [14] Top therapeutic classes by U.S. spending. 2012 [cited 2012 July 18, 2012]; Available  
22 from:  
23 [http://www.imshealth.com/deployedfiles/ims/Global/Content/Corporate/Press%20Room/Top-](http://www.imshealth.com/deployedfiles/ims/Global/Content/Corporate/Press%20Room/Top-Line%20Market%20Data%20&%20Trends/2011%20Top-line%20Market%20Data/Top_Therapy_Classes_by_Sales.pdf)  
24 [Line%20Market%20Data/Top\\_Therapy\\_Classes\\_by\\_Sales.pdf](http://www.imshealth.com/deployedfiles/ims/Global/Content/Corporate/Press%20Room/Top-Line%20Market%20Data/Top_Therapy_Classes_by_Sales.pdf)  
25  
26 [15] Top 20 global therapeutic classes, 2011. 2012 [cited; Available from:  
27 [http://www.imshealth.com/deployedfiles/ims/Global/Content/Corporate/Press%20Room/Top-](http://www.imshealth.com/deployedfiles/ims/Global/Content/Corporate/Press%20Room/Top-Line%20Market%20Data%20&%20Trends/2011%20Top-line%20Market%20Data/Top_20_Global_Therapeutic_Classes.pdf)  
28 [line%20Market%20Data/Top\\_20\\_Global\\_Therapeutic\\_Classes.pdf](http://www.imshealth.com/deployedfiles/ims/Global/Content/Corporate/Press%20Room/Top-Line%20Market%20Data%20&%20Trends/2011%20Top-</a><br/>29 <a href=)  
30  
31 [16] Alexander G, Gallagher S, Mascola A, Moloney R, Stafford R. Increasing off-label use of  
32 antipsychotic medications in the United States, 1995-2008. *Pharmacoepidemiol Drug Saf*.  
33 2011;20(2):177-84.  
34  
35 [17] Mark T. For what diagnoses are psychotropic medications being prescribed?: A  
36 nationally representative surge of physicians. *CNS Drugs*. 2010;24(4):319-26.  
37 [18] PhRMA clinical study results database proposal. 2004 [cited August 30, 2008];  
38 Available from:  
39 [http://www.aei.org/files/2004/09/20/20040927\\_ClinicalStudyResultsDatabase.pdf](http://www.aei.org/files/2004/09/20/20040927_ClinicalStudyResultsDatabase.pdf)  
40  
41 [19] PASW Statistics, 18.0. Chicago: Predictive Analytics Software 2009.  
42 [20] De Deyn PP, Carrasco M, Deberdt W, Jeandel C, Hay D, Feldman P, et al. Olanzapine  
43 versus placebo in the treatment of psychosis with or without associated behavioral disturbances  
44 in patients with Alzheimer's disease. *Int J Geriatr Psychiatry*. 2004;19:115-26.  
45 [21] Tran-Johnson T, Sack D, Marcus R, Auby P, McQuade R, Oren D. Efficacy and safety of  
46 intramuscular aripiprazole in patients with acute agitation: A randomized, double-blind, placebo-  
47 controlled trial. *J Clin Psychiatry*. 2007;68(1):111-9.  
48 [22] Veitch E. Silent takedown of the pharma trials database...and more. 2012 [cited;  
49 Available from: [http://blogs.plos.org/speakingofmedicine/2012/03/23/silent-takedown-of-the-](http://blogs.plos.org/speakingofmedicine/2012/03/23/silent-takedown-of-the-pharma-trials-database%E2%80%A6and-more/)  
50 [pharma-trials-database%E2%80%A6and-more/](http://blogs.plos.org/speakingofmedicine/2012/03/23/silent-takedown-of-the-pharma-trials-database%E2%80%A6and-more/)  
51  
52 [23] Chan A-W, Hrobjartsson A, Haahr MT, Gotzsche PC, Altman DG. Empirical evidence  
53 for selective reporting of outcomes in randomized trials: comparison of protocols to published  
54 articles. *JAMA*. 2004;291(20):2457-65.  
55  
56  
57  
58  
59  
60

- 1  
2  
3 [24] Heres S, Davies J, Maino K, Jetzinger E, Kissling W, Leucht S. Why olanzapine beats  
4 risperidone, risperidone beats quetiapine, and quetiapine beats olanzapine: An exploratory  
5 analysis of head-to-head comparison studies of second-generation antipsychotics. *Amer J Psych*.  
6 2006;163:185-94.  
7  
8 [25] Ioannidis JPA, Lau J. Completeness of safety reporting in randomized trials: An  
9 evaluation of 7 medical areas. *JAMA*. 2001;285:437-43.  
10 [26] Jones C, Handler L, Crowell K, Keil L, Weaver M, Platts-Mills T. Non-publication of  
11 large randomized clinical trials: cross sectional analysis. *BMJ*. 2013;347:f6104.  
12 [27] Wieseler B, Kerekes MF, Vervoelgyi V, McGauran N, Kaiser T. Impact of document  
13 type on reporting quality of clinical drug reports: a comparison of registry reports, clinical study  
14 reports, and journal publications. *Br Med J*. 2012;344:d8141.  
15 [28] Torjesen I. Europe's drug agency will publish clinical trial data for new products from  
16 2014. *BMJ*. 2012;345:e8061.  
17 [29] Doshi P, Dickersin K, Healy D, Vedula SS, Jefferson T. Restoring invisible and  
18 abandoned trials: A call for people to publish findings. *BMJ*. 2013;346:f2865.  
19 [30] Chan A-W, Song F, Vickers A, Jefferson T, Dickersin K, Gotzsche PC, et al. Increasing  
20 value and reducing waste: addressing inaccessible research. *The Lancet*. 2014;383:257-66.  
21 [31] Goldacre B. Are clinical trial data shared sufficiently today? No. *BMJ*. 2013;347(f1880).  
22 [32] Kirsch I, Moore T, Scoboria A, Nicholls S. The emperor's new drugs: An analysis of  
23 antidepressant medication data submitted to the U.S. Food and Drug Administration. *Prevention*  
24 & *Treatment*. 2002;5(23).  
25 [33] Melander H, Ahlqvist-Rastad J, Meijer G, Beermann B. Evidence-b(i)ased medicine --  
26 selective reporting from studies sponsored by pharmaceutical industry: Review of studies in new  
27 drug applications. *Br Med J*. 2003;326:1171-3.  
28 [34] Papanikolaou P, Churchill R, Wahlbeck K, Ioannidis JPA. Safety reporting in  
29 randomized trials of mental health interventions. *Amer J Psych*. 2004;161:1692-7.  
30 [35] Turner E, Matthews AM, Linardatos E, Tell R, Rosenthal R. Selective publication of  
31 antidepressant trials and its influence on apparent efficacy. *The New England Journal of*  
32 *Medicine*. 2008;358:252-60.  
33 [36] Rodgers M, Brown J, Heirs M, Higgins J, Mannion R, Simmonds M, et al. Reporting of  
34 industry funded study outcome data: comparison of confidential and publicized data on the  
35 safety and effectiveness of rhBMP-2 for spinal fusion. *BMJ*. 2013;346:f3981.  
36 [37] Angell M. Industry-sponsored clinical research: a broken system. *JAMA*.  
37 2008;300(9):1069-71.  
38 [38] Relman A, Angell M. America's other drug problem. *The New Republic*.  
39 2002;227(25):27-41.  
40 [39] Baker D. The benefits and savings from publicly funded clinical trials of prescription  
41 drugs. *International Journal of Health Services*. 2008;38(4):731-50.  
42 [40] Ross JS, Gross CP, Krumholz HM. Promoting transparency in pharmaceutical-sponsored  
43 research. *American Journal of Public Health*. 2012;102(1):72-80.  
44 [41] Gotzsche PC. *Deadly medicines and organized crime: How big pharma has corrupted*  
45 *healthcare*. London: Radcliffe Publishing 2013.  
46 [42] Peart K. Yale program's agreement with Johnson & Johnson allows broad access to  
47 clinical trial data. 2014 [cited; Available from: [http://news.yale.edu/2014/01/30/yale-program-s-](http://news.yale.edu/2014/01/30/yale-program-s-agreement-johnson-johnson-allows-broad-access-clinical-trial-data)  
48 [agreement-johnson-johnson-allows-broad-access-clinical-trial-data](http://news.yale.edu/2014/01/30/yale-program-s-agreement-johnson-johnson-allows-broad-access-clinical-trial-data)  
49  
50 [43] Castellani J. Are clinical trial data shared sufficiently today? Yes. *BMJ*. 2013;347:f1881.  
51  
52  
53  
54  
55  
56  
57  
58  
59  
60

- 1  
2  
3 [44] Prasad S, Harpin V, Poole L, Zeitlin H, Jamdar S, Puvanendran K. A multi-centre,  
4 randomised, open-label study of atomoxetine compared with standard current therapy in UK  
5 children and adolescents with attention-deficit/hyperactivity disorder (ADHD). *Current Medical*  
6 *Research and Opinion*. 2007;23(2):379-94.  
7  
8 [45] Meehan K, Zhang F, David S, Tohen M, Janicak P, Small J, et al. A double-blind,  
9 randomized comparison of the efficacy and safety of intramuscular injections of olanzapine,  
10 lorazepam, or placebo in treating acutely agitated patients diagnosed with bipolar mania. *J Clin*  
11 *Psychopharmacol*. 2001;21(4):389-97.  
12  
13 [46] Zimbroff D, Warrington L, Loebel A, Yang R, Sui C. Comparison of ziprasidone and  
14 aripiprazole in acutely ill subjects with schizophrenia or schizoaffective disorder: A randomized,  
15 double-blind, 4-week study. *Int Clin Psychopharmacol*. 2007;6:363-70.  
16  
17 [47] Kratochvil C, Michelson D, Newcorn J, Weiss M, Busner J, Moore R, et al. High-dose  
18 atomoxetine treatment of ADHD in youths with limited response to standard doses. *J Am Acad*  
19 *Child Adolesc Psychiatry*. 2007;46(9):1128-37.  
20  
21 [48] Street J, Clark S, Gannon K, Cummings J, Bymaster F, Tamura R, et al. Olanzapine  
22 treatment of psychotic and behavioral symptoms in patients with Alzheimers disease in nursing  
23 care facilities. *Arch Gen Psychiatry*. 2000;57:968-76.  
24  
25 [49] Kamijima K, Kuboki T, Kumano H, Burt T, Cohen G, Arano. I, et al. A placebo-  
26 controlled, randomized withdrawal study of sertraline for panic disorder in Japan. *International*  
27 *Clinical Psychopharmacology*. 2005;20:265-73.  
28  
29 [50] Tohen M, Calabrese J, Sachs G, Banov M, Detke H, Risser R, et al. Randomized,  
30 placebo-controlled trial of olanzapine as maintenance therapy in patients with bipolar I disorder  
31 responding to acute treatment with olanzapine. *Am J Psychiatry*. 2006;163(2):247-56.  
32  
33  
34  
35  
36  
37  
38  
39  
40  
41  
42  
43  
44  
45  
46  
47  
48  
49  
50  
51  
52  
53  
54  
55  
56  
57  
58  
59  
60

Figure 1. Clinical trial summary search results

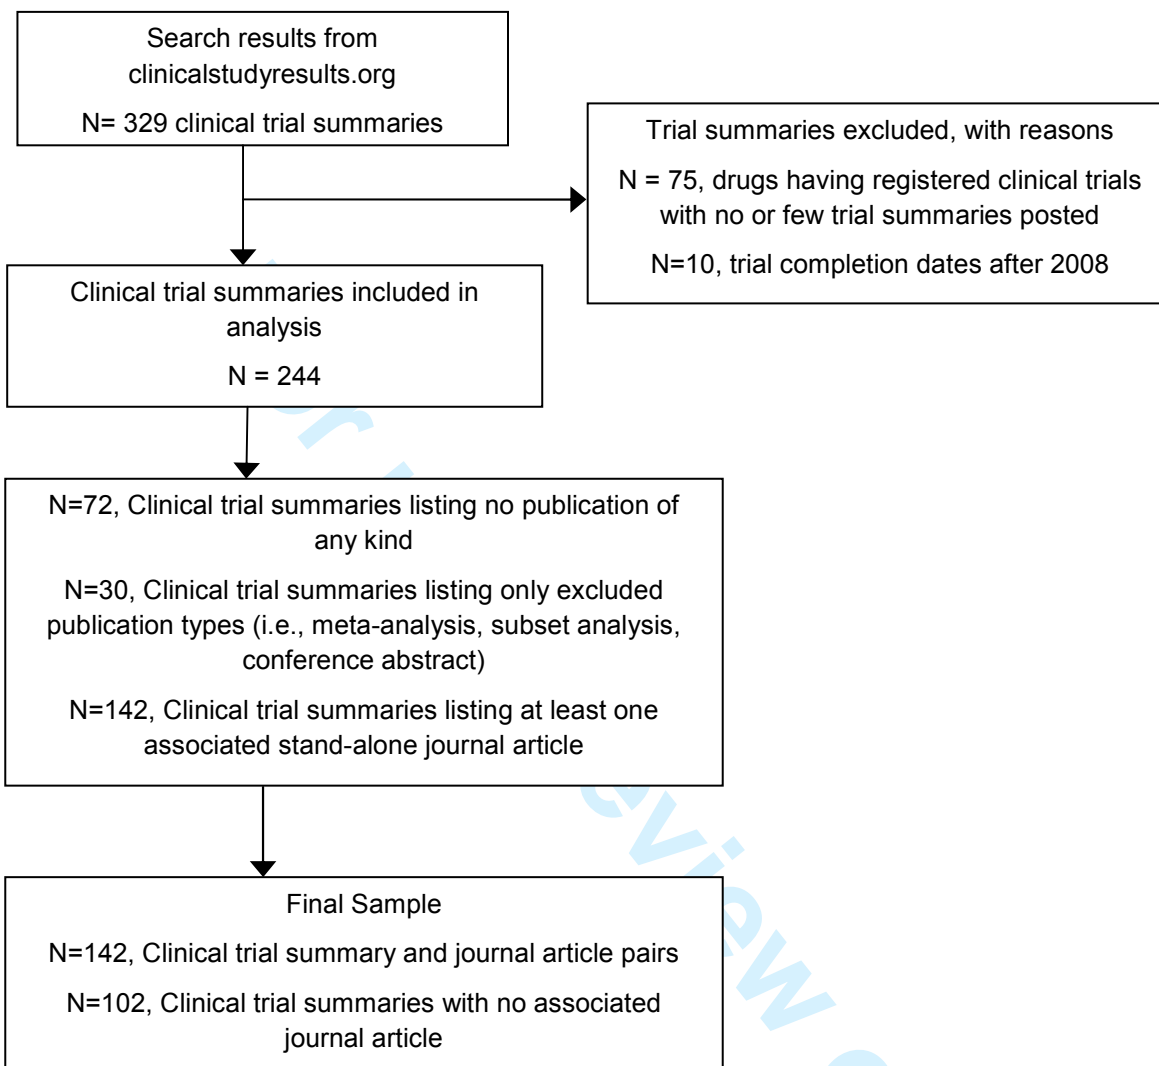

Table 1. Description of included studies

|                                        | N   | Modal trial completion or article publication year | Average (median) number of publications per trial <sup>a</sup> | Average years from trial completion to article publication | Average (median) trial length in weeks | Maximum trial length in weeks | Number of drug treated participants (% as reported in summaries) | Total no. participants |
|----------------------------------------|-----|----------------------------------------------------|----------------------------------------------------------------|------------------------------------------------------------|----------------------------------------|-------------------------------|------------------------------------------------------------------|------------------------|
| <b>Aripiprazole</b>                    |     |                                                    |                                                                |                                                            |                                        |                               |                                                                  |                        |
| Trial summary                          | 28  | 2006                                               | 0.62 (1)                                                       | 2.6                                                        | 20.8 (8)                               | 140                           | 5,809                                                            | 9,935                  |
| Journal article                        | 28  | 2009                                               | --                                                             | --                                                         | 10.7 (8)                               | 52                            | 5,696 (98)                                                       | 9,728                  |
| Unpublished trial summary <sup>b</sup> | 21  | 2003                                               | --                                                             | --                                                         | 29.9 (26)                              | 94                            | 6,896                                                            | 8,112                  |
| <b>Olanzapine</b>                      |     |                                                    |                                                                |                                                            |                                        |                               |                                                                  |                        |
| Trial summary                          | 33  | 2000                                               | 1.78 (1)                                                       | 2.7                                                        | 26.5 (24)                              | 78                            | 8,515                                                            | 12,136                 |
| Journal article                        | 33  | 2002                                               | --                                                             | --                                                         | 16.8 (6)                               | 78                            | 8,225 (97)                                                       | 11,932                 |
| Unpublished trial summary              | 18  | 2005                                               | --                                                             | --                                                         | 18.7 (19)                              | 48                            | 3,120                                                            | 4,997                  |
| <b>Ziprasidone</b>                     |     |                                                    |                                                                |                                                            |                                        |                               |                                                                  |                        |
| Trial summary                          | 8   | 2005                                               | 0.79 (0)                                                       | 3.8                                                        | 17.1 (12)                              | 60                            | 910                                                              | 1,399                  |
| Journal article                        | 8   | 2007                                               | --                                                             | --                                                         | 10.5 (10)                              | 27                            | 910 (100)                                                        | 1,399                  |
| Unpublished trial summary              | 21  | 2008                                               | --                                                             | --                                                         | 38.4 (12)                              | 320                           | 3,268                                                            | 4,459                  |
| <b>Atomoxetine</b>                     |     |                                                    |                                                                |                                                            |                                        |                               |                                                                  |                        |
| Trial summary                          | 31  | 2005                                               | 1.76 (1)                                                       | 2.2                                                        | 35.9 (18)                              | 181                           | 4,313                                                            | 7,094                  |
| Journal article                        | 31  | 2007                                               | --                                                             | --                                                         | 16.7 (10)                              | 97                            | 4,138 (96)                                                       | 6,975                  |
| Unpublished trial summary              | 20  | 2006                                               | --                                                             | --                                                         | 35.7 (24)                              | 104                           | 3,640                                                            | 4,469                  |
| <b>Duloxetine</b>                      |     |                                                    |                                                                |                                                            |                                        |                               |                                                                  |                        |
| Trial summary                          | 35  | 2005                                               | 4.69 (3)                                                       | 2                                                          | 27.1 (13)                              | 103                           | 14,185                                                           | 18,334                 |
| Journal article                        | 35  | 2007                                               | --                                                             | --                                                         | 22.8 (13)                              | 103                           | 14,185 (100)                                                     | 18,334                 |
| Unpublished trial summary              | 13  | 2004                                               | --                                                             | --                                                         | 24.2 (15)                              | 62                            | 2,115                                                            | 3,413                  |
| <b>Sertraline</b>                      |     |                                                    |                                                                |                                                            |                                        |                               |                                                                  |                        |
| Trial summary                          | 7   | 2003                                               | 1.53 (1)                                                       | 2.9                                                        | 37.7 (22)                              | 128                           | 2,147                                                            | 2,326                  |
| Journal article                        | 7   | 2005                                               | --                                                             | --                                                         | 22.9 (22)                              | 52                            | 2,147 (100)                                                      | 2,326                  |
| Unpublished trial summary              | 9   | 2001                                               | --                                                             | --                                                         | 15.4 (10)                              | 36                            | 1,045                                                            | 1,541                  |
| <b>All Drugs</b>                       |     |                                                    |                                                                |                                                            |                                        |                               |                                                                  |                        |
| Trial summary                          | 142 | 2005                                               | 2 (1)                                                          | 2.5                                                        | 27.8 (12)                              | 181                           | 35,879                                                           | 51,224                 |
| Journal article                        | 142 | 2007                                               | --                                                             | --                                                         | 16.7 (11)                              | 103                           | 35,269 (98)                                                      | 50,694                 |
| Unpublished trial summary              | 102 | 2006                                               | --                                                             | --                                                         | 28.8 (16)                              | 320                           | 20,084                                                           | 26,992                 |

<sup>a</sup>Average and median number of publications reflect all publications listed on the trial summary cover page, including stand-alone journal articles, meta-analyses, sub-set analyses, and conference abstracts.

<sup>b</sup>Unpublished trial summary refers to clinical trial summaries posted on the publicly accessible clinicalstudyresults.org website, but having no associated stand-alone journal article.

Table 2. Number of serious adverse events (SAEs) reported in trial summaries and journal articles for drug-treated participants

|                                               | Number (%) of studies that report the number of SAEs <sup>a</sup> | Number of SAEs (% as reported in associated trial summaries) | Number of SAEs per patient treated <sup>b</sup> |
|-----------------------------------------------|-------------------------------------------------------------------|--------------------------------------------------------------|-------------------------------------------------|
| <b>Aripiprazole</b>                           |                                                                   |                                                              |                                                 |
| Trial summary (n=28)                          | 26 (92.9)                                                         | 364                                                          | 0.06                                            |
| Journal article (n=28)                        | 27 (96.4)                                                         | 417 (114.6%)                                                 | 0.07                                            |
| Unpublished trial summary <sup>c</sup> (n=21) | 20 (95.2)                                                         | 504                                                          | 0.07                                            |
| <b>Olanzapine</b>                             |                                                                   |                                                              |                                                 |
| Trial summary (n=33)                          | 28 (84.8)                                                         | 544                                                          | 0.06                                            |
| Journal article (n=33)                        | 11 (33.3)                                                         | 66 (12.1%)                                                   | 0.008                                           |
| Unpublished trial summary (n=18)              | 17 (94.4)                                                         | 302                                                          | 0.10                                            |
| <b>Ziprasidone</b>                            |                                                                   |                                                              |                                                 |
| Trial summary (n=8)                           | 7 (87.5)                                                          | 117                                                          | 0.13                                            |
| Journal article (n=8)                         | 5 (62.5)                                                          | 53 (45.3%)                                                   | 0.06                                            |
| Unpublished trial summary (n=21)              | 21 (100.0)                                                        | 446                                                          | 0.14                                            |
| <b>Atomoxetine</b>                            |                                                                   |                                                              |                                                 |
| Trial summary (n=31)                          | 25 (80.6)                                                         | 88                                                           | 0.02                                            |
| Journal article (n=31)                        | 14 (45.2)                                                         | 13 (14.8%)                                                   | 0.003                                           |
| Unpublished trial summary (n=20)              | 17 (85.0)                                                         | 35                                                           | 0.01                                            |
| <b>Duloxetine</b>                             |                                                                   |                                                              |                                                 |
| Trial summary (n=35)                          | 32 (91.4)                                                         | 453                                                          | 0.03                                            |
| Journal article (n=35)                        | 27 (77.1)                                                         | 349 (77%)                                                    | 0.02                                            |
| Unpublished trial summary (n=13)              | 12 (92.3)                                                         | 117                                                          | 0.06                                            |
| <b>Sertraline</b>                             |                                                                   |                                                              |                                                 |
| Trial summary (n=7)                           | 7 (100.0)                                                         | 42                                                           | 0.02                                            |
| Journal article (n=7)                         | 2 (28.6)                                                          | 16 (38.1%)                                                   | 0.007                                           |
| Unpublished trial summary (n=9)               | 8 (88.9)                                                          | 19                                                           | 0.02                                            |
| <b>All Drugs</b>                              |                                                                   |                                                              |                                                 |
| Trial summary (n=142)                         | 125 (88.0)                                                        | 1,608                                                        | 0.05                                            |
| Journal article (n=142)                       | 85 (59.9)                                                         | 914 (56.8%)                                                  | 0.03                                            |
| Unpublished trial summary (n=102)             | 95 (93.1)                                                         | 1,423                                                        | 0.07                                            |

<sup>a</sup>The figures in this column indicate those publications that reported the number of SAEs that occurred. Some publications contained no statement about the occurrence of SAEs or contained an ambiguous statement without specifying the actual number of SAEs, such as “No SAEs thought to be related to study medication occurred.”

<sup>b</sup>The numerator equals the number of events; the denominator equals the total number of drug-treated participants, as reported in Table 1.

<sup>c</sup>Unpublished trial summary refers to clinical trial summaries posted on the publicly accessible clinicalstudyresults.org website, but having no associated stand-alone journal article.

Table 3. Number of deaths, suicide- and homicide-related events, and psychiatric serious adverse events in drug-treated participants

|                                               | Death                  | Suicide, completed | Suicidal ideation, attempts, injury | Homicidal ideation | New or worsened psychiatric symptoms | Total      |
|-----------------------------------------------|------------------------|--------------------|-------------------------------------|--------------------|--------------------------------------|------------|
| <b>Aripiprazole</b>                           |                        |                    |                                     |                    |                                      |            |
| Trial summary (n=28)                          | 79                     | 1                  | 4                                   | 0                  | 79                                   | 163        |
| Journal article (n=28)                        | 27 (34.2) <sup>a</sup> | 1 (100.0)          | 5 (125.0)                           | 0                  | 66 (83.5)                            | 99 (60.7)  |
| Unpublished trial summary <sup>b</sup> (n=21) | 15                     | 1                  | 10                                  | 0                  | 92                                   | 118        |
| <b>Olanzapine</b>                             |                        |                    |                                     |                    |                                      |            |
| Trial summary (n=33)                          | 50                     | 9                  | 18                                  | 0                  | 85                                   | 162        |
| Journal article (n=33)                        | 19 (38.0)              | 1 (11.1)           | 4 (22.2)                            | 0                  | 14 (16.5)                            | 38 (23.5)  |
| Unpublished trial summary (n=18)              | 7                      | 3                  | 21                                  | 1                  | 95                                   | 127        |
| <b>Ziprasidone</b>                            |                        |                    |                                     |                    |                                      |            |
| Trial summary (n=8)                           | 0                      | 1                  | 13                                  | 1                  | 30                                   | 45         |
| Journal article (n=8)                         | 0 (0)                  | 1 (100.0)          | 5 (38.5)                            | 1 (100.0)          | 14 (46.7)                            | 20 (44.4)  |
| Unpublished trial summary (n=21)              | 18                     | 1                  | 23                                  | 3                  | 141                                  | 186        |
| <b>Atomoxetine</b>                            |                        |                    |                                     |                    |                                      |            |
| Trial summary (n=31)                          | 0                      | 0                  | 7                                   | 0                  | 6                                    | 13         |
| Journal article (n=31)                        | 0                      | 0                  | 0 (0)                               | 0                  | 0 (0)                                | 0 (0)      |
| Unpublished trial summary (n=20)              | 1                      | 0                  | 5                                   | 0                  | 5                                    | 11         |
| <b>Duloxetine</b>                             |                        |                    |                                     |                    |                                      |            |
| Trial summary (n=35)                          | 11                     | 4                  | 40                                  | 0                  | 27                                   | 82         |
| Journal article (n=35)                        | 11 (100.0)             | 4 (100.0)          | 33 (82.5)                           | 0                  | 21 (77.8)                            | 69 (84.1)  |
| Unpublished trial summary (n=13)              | 3                      | 0                  | 10                                  | 0                  | 20                                   | 33         |
| <b>Sertraline</b>                             |                        |                    |                                     |                    |                                      |            |
| Trial summary (n=7)                           | 11                     | 0                  | 5                                   | 0                  | 11                                   | 27         |
| Journal article (n=7)                         | 0 (0)                  | 0                  | 0 (0)                               | 0 (0)              | 0 (0)                                | 0 (0)      |
| Unpublished trial summary (n=9)               | 1                      | 0                  | 10                                  | 1                  | 4                                    | 16         |
| <b>All Drugs</b>                              |                        |                    |                                     |                    |                                      |            |
| Trial summary (n=142)                         | 151                    | 15                 | 87                                  | 1                  | 238                                  | 492        |
| Journal article (n=142)                       | 57 (37.7)              | 7 (46.7)           | 47 (54.0)                           | 1 (100.0)          | 115 (48.3)                           | 227 (46.1) |
| Unpublished trial summary (n=102)             | 45                     | 5                  | 79                                  | 5                  | 357                                  | 491        |

<sup>a</sup>Percent as reported in associated trial summaries.

<sup>b</sup>Unpublished trial summary refers to clinical trial summaries posted on the publicly accessible [clinicalstudyresults.org](http://clinicalstudyresults.org) website, but having no associated stand-alone journal article.



Table 4. Percentage of trial summary -journal article pairs that report serious adverse event (SAE) data consistently across sources

| Summary-Article Pairs | Number of SAEs            |                                 | Description of SAEs       |
|-----------------------|---------------------------|---------------------------------|---------------------------|
|                       | Consistent across sources | > 20% difference across sources | Consistent across sources |
| Aripiprazole (n=28)   | 67.9                      | 25.0                            | 28.6                      |
| Olanzapine (n=33)     | 27.3                      | 72.7                            | 30.3                      |
| Ziprasidone (n=8)     | 37.5                      | 37.5                            | 37.5                      |
| Atomoxetine (n=31)    | 54.8                      | 45.2                            | 42.0                      |
| Duloxetine (n=35)     | 62.9                      | 37.1                            | 31.4                      |
| Sertraline (n=7)      | 28.6                      | 71.4                            | 14.3                      |
| All Drugs (n=142)     | 50.7                      | 49.2                            | 32.4                      |

Table 5. Explanations for Discrepant Reporting of SAEs between Journal Articles and Trial Summaries

| Category-General explanation for discrepant reporting | Specific explanation for discrepant reporting                                                   | Example                                                                                                                                                                                                                                                                                                                                                                                                                                                                                                         |
|-------------------------------------------------------|-------------------------------------------------------------------------------------------------|-----------------------------------------------------------------------------------------------------------------------------------------------------------------------------------------------------------------------------------------------------------------------------------------------------------------------------------------------------------------------------------------------------------------------------------------------------------------------------------------------------------------|
| Difference in study length or phase reported          | Reporting only one phase of a multi-phase trial                                                 | In atomoxetine trial 6962, the journal article cites zero SAEs in the 10-week acute phase [44]; three SAEs that were thought to be related to study medication (suicidal ideation, aggression, and self-injurious behavior) occurred in the 22-week extension phase reported in the trial summary.                                                                                                                                                                                                              |
|                                                       | Not reporting SAEs that occurred during follow-up                                               | In olanzapine trial 3045, the journal article stated “there were no deaths during the study,” but failed to cite the death that occurred within 30 days after the study [45].                                                                                                                                                                                                                                                                                                                                   |
| Difference in reporting criteria used                 | Not reporting SAEs that were presumed to be unrelated to the study drug                         | In these cases, journal articles would either make no mention at all of SAEs or would include a statement implying that SAEs did occur but without providing an exact figure, such as “No patients in either treatment group had a serious adverse event that was considered study medication related” [46].                                                                                                                                                                                                    |
|                                                       | Not reporting SAEs that were not statistically significantly different between treatment groups | In atomoxetine trial 5831, two SAEs thought to be “unlikely but possibly related” to the study drug were unreported in the associated journal article [47].<br><br>In olanzapine trial 1032, 28 SAEs occurred in the randomized phase on which the journal article presents results. The journal article, however, contains no statement about SAE occurrence presumably because, as the trial summary indicates, there were no statistically significant differences in SAEs between treatment groups [48].    |
| Apparent selective reporting of data                  | Omissions of SAE data                                                                           | In sertraline trial 1060, the trial summary cites 5 SAEs in drug-treated participants, one of which occurred in the open-label phase and was thought by investigators to be related to the study drug. The journal article reports on the full length of the trial (open and double-blind phases), but only includes this statement related to SAEs: “No subjects had serious adverse events related to study treatment in either treatment group <i>during the double-blind phase</i> ” [49] [emphasis added]. |

---

In olanzapine trial 2354, the journal article reports a lower number of SAEs than cited for the same study phase in the trial summary, and describes “the majority” of SAEs as “worsening of the illness” [50]. The trial summary reports a higher incidence of SAEs and more precisely details the events as suicidal ideation, suicide attempt, mania, and so on.

---

For peer review only

Appendix Table 1. Trial completion dates and time to journal article publication for six psychotropic drugs on clinicalstudyresults.org

|                                                   | 1999 or earlier | 2000  | 2001   | 2002   | 2003   | 2004   | 2005   | 2006   | 2007   | 2008  | 2009 or later |
|---------------------------------------------------|-----------------|-------|--------|--------|--------|--------|--------|--------|--------|-------|---------------|
| <b>Aripiprazole</b>                               |                 |       |        |        |        |        |        |        |        |       |               |
| Number of completed trials                        | 0               | 0     | 3      | 5      | 10     | 5      | 4      | 11     | 8      | 3     | 3             |
| (% published as stand-alone article) <sup>a</sup> |                 |       | (66.7) | (40)   | (40)   | (100)  | (75)   | (54.5) | (37.5) | (100) | (0)           |
| Average years to article publication              | --              | --    | 3      | 5      | 5      | 2.4    | 3      | 2      | 1.7    | 1     | n/a           |
| <b>Olanzapine</b>                                 |                 |       |        |        |        |        |        |        |        |       |               |
| Number of completed trials                        | 12              | 7     | 2      | 7      | 3      | 0      | 7      | 8      | 4      | 1     | 0             |
| (% published as stand-alone article)              | (91.7)          | (100) | (100)  | (85.7) | (33.3) |        | (28.6) | (37.5) | (0)    | (100) |               |
| Average years to article publication              | 2.2             | 2.3   | 4      | 3.5    | 3      | --     | 3      | 3      | n/a    | 1     | --            |
| <b>Ziprasidone</b>                                |                 |       |        |        |        |        |        |        |        |       |               |
| Number of completed trials                        | 0               | 0     | 0      | 2      | 5      | 4      | 7      | 2      | 1      | 8     | 5             |
| (% published as stand-alone article)              |                 |       |        | (50)   | (20)   | (25)   | (42.9) | (100)  | (0)    | (0)   | (0)           |
| Average years to article publication              | --              | --    | --     | 5      | 2      | 6      | 3.7    | 3      | n/a    | n/a   | n/a           |
| <b>Atomoxetine</b>                                |                 |       |        |        |        |        |        |        |        |       |               |
| Number of completed trials                        | 1               | 2     | 6      | 6      | 6      | 7      | 8      | 12     | 3      | 0     | 0             |
| (% published as stand-alone article)              | (100)           | (100) | (66.7) | (83.3) | (66.7) | (71.4) | (75)   | (16.7) | (66.7) |       |               |
| Average years to article publication              | 3               | 2     | 2.3    | 2.6    | 2.8    | 2.8    | 1.8    | 1      | 1      | --    | --            |
| <b>Duloxetine</b>                                 |                 |       |        |        |        |        |        |        |        |       |               |
| Number of completed trials                        | 3               | 1     | 6      | 4      | 5      | 7      | 10     | 4      | 8      | 0     | 1             |
| (% published as stand-alone article)              | (0)             | (100) | (66.7) | (100)  | (100)  | (57.1) | (90)   | (75)   | (62.5) |       | (0)           |
| Average years to article publication              | n/a             | 2     | 1.8    | 3      | 2.8    | 2      | 2.1    | 1.3    | 1.4    | --    | n/a           |
| <b>Sertraline</b>                                 |                 |       |        |        |        |        |        |        |        |       |               |
| Number of completed trials                        | 4               | 0     | 3      | 0      | 5      | 0      | 2      | 0      | 2      | 0     | 0             |
| (% published as stand-alone article)              | (75)            |       | (0)    |        | (80)   |        | (0)    |        | (0)    |       |               |
| Average years to article publication              | 4.3             | --    | n/a/   | --     | 1.8    | --     | n/a    | --     | n/a    | --    | --            |
| <b>All Drugs</b>                                  |                 |       |        |        |        |        |        |        |        |       |               |
| Number of completed trials                        | 20              | 10    | 20     | 24     | 34     | 23     | 38     | 37     | 26     | 12    | 10            |
| (% published as stand-alone article)              | (75)            | (100) | (60)   | (75)   | (56)   | (65)   | (60)   | (43)   | (38)   | (33)  | (0)           |
| Average years to article publication              | 3.2             | 2.1   | 2.8    | 3.8    | 2.9    | 3.3    | 2.7    | 2.1    | 1.4    | 1     | n/a           |

<sup>a</sup> Meta-analyses and sub-set analyses published in journals and conference abstracts are not included in the percent published.

Appendix Table 2: Drug-treated participants and serious adverse events (SAEs) among ten trial summaries of clinical trials completed in 2009 or later (excluded from the published analysis)

|              | Number of excluded trial summaries | Number of drug- treated participants | Total number of SAEs in drug-treated participants | Number of SAEs |                    |                                    |                                      |
|--------------|------------------------------------|--------------------------------------|---------------------------------------------------|----------------|--------------------|------------------------------------|--------------------------------------|
|              |                                    |                                      |                                                   | Death          | Suicide, completed | Suicidal ideation, attempt, injury | New or worsened psychiatric symptoms |
| Aripiprazole | 3                                  | 676                                  | 39                                                | 1              | 1                  | 1                                  | 2                                    |
| Olanzapine   | 0                                  | NA                                   | NA                                                | NA             | NA                 | NA                                 | NA                                   |
| Ziprasidone  | 5                                  | 1436                                 | 124                                               | 3              | 2                  | 9                                  | 57                                   |
| Atomoxetine  | 0                                  | NA                                   | NA                                                | NA             | NA                 | NA                                 | NA                                   |
| Duloxetine   | 1                                  | 657                                  | 2                                                 | 0              | 0                  | 0                                  | 1                                    |
| Sertraline   | 1                                  | 157                                  | 2                                                 | 0              | 0                  | 1                                  | 0                                    |
| All Drugs    | 10                                 | 2926                                 | 167                                               | 4              | 3                  | 11                                 | 60                                   |

1  
2  
3  
4  
5  
6  
7  
8  
9  
10  
11  
12  
13  
14  
15  
16  
17  
18  
19  
20  
21  
22  
23  
24  
25  
26  
27  
28  
29  
30  
31  
32  
33  
34  
35  
36  
37  
38  
39  
40  
41  
42  
43  
44  
45  
46  
47  
48  
49  
50  
51  
52  
53  
54  
55  
56  
57  
58  
59  
60

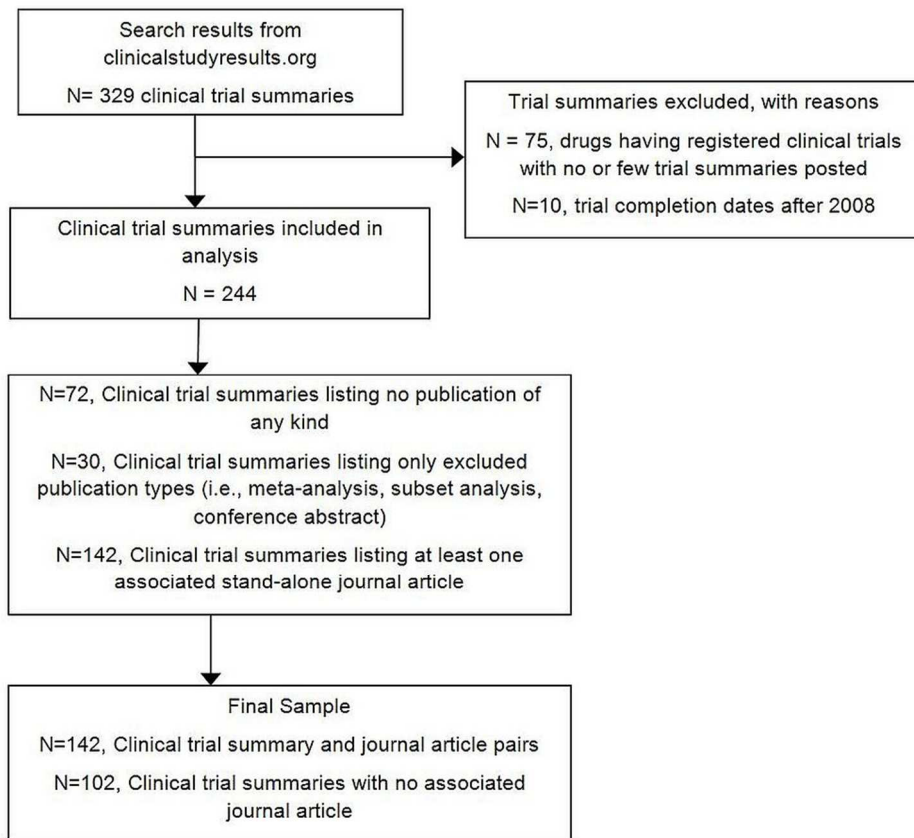

90x78mm (300 x 300 DPI)

For peer review only

Appendix Table 1. Trial completion dates and time to journal article publication for six psychotropic drugs on clinicalstudyresults.org

|                                                   | 1999 or earlier | 2000  | 2001   | 2002   | 2003   | 2004   | 2005   | 2006   | 2007   | 2008  | 2009 or later |
|---------------------------------------------------|-----------------|-------|--------|--------|--------|--------|--------|--------|--------|-------|---------------|
| <b>Aripiprazole</b>                               |                 |       |        |        |        |        |        |        |        |       |               |
| Number of completed trials                        | 0               | 0     | 3      | 5      | 10     | 5      | 4      | 11     | 8      | 3     | 3             |
| (% published as stand-alone article) <sup>a</sup> |                 |       | (66.7) | (40)   | (40)   | (100)  | (75)   | (54.5) | (37.5) | (100) | (0)           |
| Average years to article publication              | --              | --    | 3      | 5      | 5      | 2.4    | 3      | 2      | 1.7    | 1     | n/a           |
| <b>Olanzapine</b>                                 |                 |       |        |        |        |        |        |        |        |       |               |
| Number of completed trials                        | 12              | 7     | 2      | 7      | 3      | 0      | 7      | 8      | 4      | 1     | 0             |
| (% published as stand-alone article)              | (91.7)          | (100) | (100)  | (85.7) | (33.3) |        | (28.6) | (37.5) | (0)    | (100) |               |
| Average years to article publication              | 2.2             | 2.3   | 4      | 3.5    | 3      | --     | 3      | 3      | n/a    | 1     | --            |
| <b>Ziprasidone</b>                                |                 |       |        |        |        |        |        |        |        |       |               |
| Number of completed trials                        | 0               | 0     | 0      | 2      | 5      | 4      | 7      | 2      | 1      | 8     | 5             |
| (% published as stand-alone article)              |                 |       |        | (50)   | (20)   | (25)   | (42.9) | (100)  | (0)    | (0)   | (0)           |
| Average years to article publication              | --              | --    | --     | 5      | 2      | 6      | 3.7    | 3      | n/a    | n/a   | n/a           |
| <b>Atomoxetine</b>                                |                 |       |        |        |        |        |        |        |        |       |               |
| Number of completed trials                        | 1               | 2     | 6      | 6      | 6      | 7      | 8      | 12     | 3      | 0     | 0             |
| (% published as stand-alone article)              | (100)           | (100) | (66.7) | (83.3) | (66.7) | (71.4) | (75)   | (16.7) | (66.7) |       |               |
| Average years to article publication              | 3               | 2     | 2.3    | 2.6    | 2.8    | 2.8    | 1.8    | 1      | 1      | --    | --            |
| <b>Duloxetine</b>                                 |                 |       |        |        |        |        |        |        |        |       |               |
| Number of completed trials                        | 3               | 1     | 6      | 4      | 5      | 7      | 10     | 4      | 8      | 0     | 1             |
| (% published as stand-alone article)              | (0)             | (100) | (66.7) | (100)  | (100)  | (57.1) | (90)   | (75)   | (62.5) |       | (0)           |
| Average years to article publication              | n/a             | 2     | 1.8    | 3      | 2.8    | 2      | 2.1    | 1.3    | 1.4    | --    | n/a           |
| <b>Sertraline</b>                                 |                 |       |        |        |        |        |        |        |        |       |               |
| Number of completed trials                        | 4               | 0     | 3      | 0      | 5      | 0      | 2      | 0      | 2      | 0     | 0             |
| (% published as stand-alone article)              | (75)            |       | (0)    |        | (80)   |        | (0)    |        | (0)    |       |               |
| Average years to article publication              | 4.3             | --    | n/a/   | --     | 1.8    | --     | n/a    | --     | n/a    | --    | --            |
| <b>All Drugs</b>                                  |                 |       |        |        |        |        |        |        |        |       |               |
| Number of completed trials                        | 20              | 10    | 20     | 24     | 34     | 23     | 38     | 37     | 26     | 12    | 10            |
| (% published as stand-alone article)              | (75)            | (100) | (60)   | (75)   | (56)   | (65)   | (60)   | (43)   | (38)   | (33)  | (0)           |

1  
2  
3  
4  
5  
6  
7  
8  
9  
10  
11  
12  
13  
14  
15  
16  
17  
18  
19  
20  
21  
22  
23  
24  
25  
26  
27  
28  
29  
30  
31  
32  
33  
34  
35  
36  
37  
38  
39  
40  
41  
42  
43  
44  
45  
46  
47  
48  
49

|                                      |     |     |     |     |     |     |     |     |     |   |     |
|--------------------------------------|-----|-----|-----|-----|-----|-----|-----|-----|-----|---|-----|
| Average years to article publication | 3.2 | 2.1 | 2.8 | 3.8 | 2.9 | 3.3 | 2.7 | 2.1 | 1.4 | 1 | n/a |
|--------------------------------------|-----|-----|-----|-----|-----|-----|-----|-----|-----|---|-----|

<sup>a</sup> Meta-analyses and sub-set analyses published in journals and conference abstracts are not included in the percent published.

For peer review only



Appendix Table 2: Drug-treated participants and serious adverse events (SAEs) among ten trial summaries of clinical trials completed in 2009 or later (excluded from the published analysis)

|              | Number of excluded trial summaries | Number of drug-treated participants | Total number of SAEs in drug-treated participants | Number of SAEs |                    |                                    |                                      |
|--------------|------------------------------------|-------------------------------------|---------------------------------------------------|----------------|--------------------|------------------------------------|--------------------------------------|
|              |                                    |                                     |                                                   | Death          | Suicide, completed | Suicidal ideation, attempt, injury | New or worsened psychiatric symptoms |
| Aripiprazole | 3                                  | 676                                 | 39                                                | 1              | 1                  | 1                                  | 2                                    |
| Olanzapine   | 0                                  | NA                                  | NA                                                | NA             | NA                 | NA                                 | NA                                   |
| Ziprasidone  | 5                                  | 1436                                | 124                                               | 3              | 2                  | 9                                  | 57                                   |
| Atomoxetine  | 0                                  | NA                                  | NA                                                | NA             | NA                 | NA                                 | NA                                   |
| Duloxetine   | 1                                  | 657                                 | 2                                                 | 0              | 0                  | 0                                  | 1                                    |
| Sertraline   | 1                                  | 157                                 | 2                                                 | 0              | 0                  | 1                                  | 0                                    |
| All Drugs    | 10                                 | 2926                                | 167                                               | 4              | 3                  | 11                                 | 60                                   |

## Summary ID#4091

### Clinical Study Summary: Study F1J-MC-HMAT Study Group B

|                                                                                                                                                                                                                                                                                                                                                                                                                                                                                                                                                                                                                                                                                                                                                                                                                                                                                                                                                                                                                                                                                                                                                                                                                                                                                                                                                                                                                                                                                                                                                                                                                                                                                                                                                                                                                                                                                                                                                                                                                                                                                                                                                                                                                                                                                                                                                                                                                                                                                                                                                                                                                                                                                                                                                                                                                                                                            |                                |
|----------------------------------------------------------------------------------------------------------------------------------------------------------------------------------------------------------------------------------------------------------------------------------------------------------------------------------------------------------------------------------------------------------------------------------------------------------------------------------------------------------------------------------------------------------------------------------------------------------------------------------------------------------------------------------------------------------------------------------------------------------------------------------------------------------------------------------------------------------------------------------------------------------------------------------------------------------------------------------------------------------------------------------------------------------------------------------------------------------------------------------------------------------------------------------------------------------------------------------------------------------------------------------------------------------------------------------------------------------------------------------------------------------------------------------------------------------------------------------------------------------------------------------------------------------------------------------------------------------------------------------------------------------------------------------------------------------------------------------------------------------------------------------------------------------------------------------------------------------------------------------------------------------------------------------------------------------------------------------------------------------------------------------------------------------------------------------------------------------------------------------------------------------------------------------------------------------------------------------------------------------------------------------------------------------------------------------------------------------------------------------------------------------------------------------------------------------------------------------------------------------------------------------------------------------------------------------------------------------------------------------------------------------------------------------------------------------------------------------------------------------------------------------------------------------------------------------------------------------------------------|--------------------------------|
| <b>Title of Study:</b> Duloxetine Versus Placebo and Paroxetine in the Acute Treatment of Major Depression                                                                                                                                                                                                                                                                                                                                                                                                                                                                                                                                                                                                                                                                                                                                                                                                                                                                                                                                                                                                                                                                                                                                                                                                                                                                                                                                                                                                                                                                                                                                                                                                                                                                                                                                                                                                                                                                                                                                                                                                                                                                                                                                                                                                                                                                                                                                                                                                                                                                                                                                                                                                                                                                                                                                                                 |                                |
| <b>Investigator(s):</b> This multicenter study included 20 principal investigators.                                                                                                                                                                                                                                                                                                                                                                                                                                                                                                                                                                                                                                                                                                                                                                                                                                                                                                                                                                                                                                                                                                                                                                                                                                                                                                                                                                                                                                                                                                                                                                                                                                                                                                                                                                                                                                                                                                                                                                                                                                                                                                                                                                                                                                                                                                                                                                                                                                                                                                                                                                                                                                                                                                                                                                                        |                                |
| <b>Study Center(s):</b> There were 22 study sites (two investigators had satellite sites) in the United States.                                                                                                                                                                                                                                                                                                                                                                                                                                                                                                                                                                                                                                                                                                                                                                                                                                                                                                                                                                                                                                                                                                                                                                                                                                                                                                                                                                                                                                                                                                                                                                                                                                                                                                                                                                                                                                                                                                                                                                                                                                                                                                                                                                                                                                                                                                                                                                                                                                                                                                                                                                                                                                                                                                                                                            |                                |
| <b>Length of Study:</b> 11 months<br>Date first patient enrolled: 09 March 2000<br>Date last patient completed: 06 February 2001                                                                                                                                                                                                                                                                                                                                                                                                                                                                                                                                                                                                                                                                                                                                                                                                                                                                                                                                                                                                                                                                                                                                                                                                                                                                                                                                                                                                                                                                                                                                                                                                                                                                                                                                                                                                                                                                                                                                                                                                                                                                                                                                                                                                                                                                                                                                                                                                                                                                                                                                                                                                                                                                                                                                           | <b>Phase of Development:</b> 3 |
| <p><b>Objectives:</b> The primary objective of this study was to demonstrate that duloxetine 40 mg twice daily (BID) is superior to placebo in the acute treatment of patients with <i>Diagnostic and Statistical Manual of Mental Disorders</i>, Fourth Edition (DSM-IV)–defined major depressive disorder (MDD).</p> <p>The secondary objectives of this study were:</p> <ul style="list-style-type: none"> <li>To compare the safety of duloxetine 20 mg BID, duloxetine 40 mg BID, placebo, and paroxetine using information on discontinuation rates, treatment-emergent adverse events (TEAEs), discontinuation-emergent adverse events, laboratory analyses, vital signs, and electrocardiograms (ECGs).</li> <li>To compare the efficacy of duloxetine 40 mg BID with paroxetine as measured by a noninferiority test of mean 17-item Hamilton Depression Rating Scale (HAMD<sub>17</sub>) total scores at Visit 8. Data from each of the two studies (HMAT Study Group A and Study Group B) will be combined for this comparison.</li> <li>To assess the efficacy of duloxetine 20 mg BID and duloxetine 40 mg BID compared with placebo as measured by response and remission rates.</li> <li>To compare the time to onset of action (defined as time to meeting responder criteria) of duloxetine 20 mg BID, duloxetine 40 mg BID, and paroxetine.</li> <li>To compare the efficacy of duloxetine 20 mg BID, duloxetine 40 mg BID, placebo, and paroxetine on anxiety symptoms associated with depression as measured by mean endpoint scores on the Hamilton Anxiety Rating Scale (HAMA) and the anxiety subscale of the HAMD<sub>17</sub>.</li> <li>To compare the efficacy of duloxetine 20 mg BID, duloxetine 40 mg BID, placebo, and paroxetine as measured by mean endpoint scores (after adjusting for baseline differences) on the Clinical Global Impressions of Severity scale (CGI-Severity), the Montgomery and Asberg Depression Rating Scale (MADRS), HAMD<sub>17</sub> subfactor scores, and endpoint scores on the Patient's Global Impressions of Improvement scale (PGI-Improvement).</li> <li>To compare the efficacy of duloxetine 20 mg BID, duloxetine 40 mg BID, placebo, and paroxetine on somatic complaints of pain using the Somatic Symptom Inventory scale (SSI) and Visual Analog Scales (VAS).</li> <li>To compare the impact of treatment with duloxetine 20 mg BID, duloxetine 40 mg BID, placebo, and paroxetine on sexual functioning as measured by the Arizona Sexual Experiences Scale (ASEX).</li> <li>To compare the impact of treatment with duloxetine 20 mg BID, duloxetine 40 mg BID, placebo, and paroxetine on quality of life as measured by the Quality of Life in Depression Scale (QLDS), and on medical resource utilization and work productivity as measured by the Resource Utilization scale.</li> </ul> |                                |

**Study Design:** Multicenter, parallel, double-blind, randomized, placebo- and active comparator-controlled study with blinded placebo lead-in and placebo lead-out. The protocol consisted of two identical studies conducted in parallel and reported separately (Study Group A and Study Group B). The study consisted of two study periods.

Study Period I was the 1-week screening phase of the study, and Study Period II was an 11-week acute therapy phase in which patients were assessed weekly from Visit 2 (Week 0) to Visit 5 (Week 3) and every other week from Visit 5 (Week 3) to Visit 9 (Week 11). This study design employed double-blind, variable-duration placebo lead-in and lead-out periods to blind patients and investigators at the start and end of active therapy. Figure HMA**T**b.1 illustrates the study design.

**Number of Patients:**

Planned: 356 patients (89 per treatment group)

Randomized: 86 Duloxetine 20 mg BID; 91 Duloxetine 40 mg BID ; 89 Placebo; 87 Paroxetine 20 mg QD.

Completed: 55 Duloxetine 20 mg BID; 53 Duloxetine 40 mg BID; 52 Placebo; 49 Paroxetine 20 mg QD.

**Diagnosis and Main Criteria for Inclusion:** Male and female outpatients of at least 18 years of age with a primary diagnosis of MDD as defined by the DSM-IV, and confirmed by use of the Mini International Neuropsychiatric Interview (MINI). Patients were required to have a HAMD<sub>17</sub> total score  $\geq 15$  and a CGI-Severity total score  $\geq 4$  at both Visit 1 and Visit 2.

**Test Product, Dose, and Mode of Administration:** Duloxetine capsules, 20 mg; patients took 40 mg orally twice daily or 20 mg orally twice daily.

**Duration of Treatment:**

Duloxetine: 8 weeks

Paroxetine: 8 weeks

Placebo: 11 weeks

**Reference Therapy, Dose, and Mode of Administration:**

Paroxetine 20 mg capsules; patients took 20 mg orally once daily.

Placebo capsules

**Variables:**

**Efficacy:** The primary efficacy measure was the HAMD<sub>17</sub> total score. Secondary efficacy measures included HAMD<sub>17</sub> response rates (50% reduction from baseline to endpoint), HAMD<sub>17</sub> remission rates (endpoint score  $\leq 7$ ), time to sustained response, and time to sustained remission. Other secondary measures included the HAMD<sub>17</sub> subfactors and individual items, MADRS, CGI-Severity, PGI-Improvement, HAMA, Somatic Symptom Inventory (SSI) 26- and 28-item scale, and Visual Analog Scales (VAS) for pain.

**Safety:** Safety was evaluated through the collection and reporting of discontinuation rates, TEAEs, discontinuation-emergent adverse events, laboratory analyses, vital signs, ECGs, and the ASEX.

**Health Outcomes:** Health outcomes were evaluated using the QLDS scale and Health Resource Utilization scales. Health Resource Utilization results will not be reported in this synopsis.

**Evaluation Methods:**Statistical:

The primary efficacy comparison was between duloxetine 40 mg BID and placebo, based on the likelihood-based repeated measures analysis. The terms in the repeated measure analysis model included treatment, visit, investigative site, baseline score, and the interactions of visit with treatment and baseline score. For secondary measures, an analysis of covariance (ANCOVA)/analysis of variance (ANOVA) model containing terms for treatment, investigator, and baseline score (no baseline score term in ANOVA model) was used for continuous variables. Categorical variables such as response and remission rates were evaluated using Fisher's exact test and the Cochran-Mantel-Haenszel (CMH) chi-square test with investigative site as strata. Time to event data, such as time to onset of action, were analyzed using the Kaplan-Meier method, and the treatment group differences were tested by the log-rank and Wilcoxon tests.

An intent-to-treat (ITT) principle was applied in all efficacy and safety analyses. For all total scores calculated from individual items, if any of the individual items was missing, the corresponding total score was considered missing. Sites with fewer than 8 randomly assigned patients with baseline and at least one postbaseline (Visit 4 to Visit 8) HAMD<sub>17</sub> total score were pooled. If this resulted in a pooled site with fewer than 8 patients, these patients were pooled with the next smallest site. For efficacy and safety analyses, treatment group differences were tested at a 2-sided significance level of 0.05.

The planned sample size (356 patients) provides 83% power to detect a difference between the duloxetine 40 mg BID and placebo groups of 3.25 points in mean change from baseline to endpoint of the HAMD<sub>17</sub> total score, assuming a common standard deviation of 7.0, 90% of patients would provide at least one baseline and one postbaseline assessment, and using a two-sided test with  $\alpha=0.05$ . Using data pooled from Study Group A and Study Group B, this sample size also provides 80% power to test the non-inferiority of duloxetine 40 mg BID compared with paroxetine using a one-sided 97.5% confidence interval and an equivalence limit of -2.2 for mean HAMD<sub>17</sub> scores.

**Summary:**

Disposition/Demographics (Table HMA**T**b.1): A total of 353 patients were randomly assigned and enrolled into the study. Of these, 209 patients completed the acute therapy phase (placebo, n=52; duloxetine 20 mg BID, n=55; duloxetine 40 mg BID, n=53; paroxetine 20 mg QD, n=49) and 206 completed the entire study. The percentages of patients who discontinued for any reason during the acute therapy phase were similar among the four treatment groups. No statistically significant differences were observed among treatment groups with regard to age, gender, origin, or height. Patients had a mean age of approximately 40 years, with the majority being Caucasian and female.

Efficacy Measures (Tables HMA**T**b.2, Table HMA**T**b.3): Patients treated with duloxetine at both doses (20 mg BID and 40 mg BID) had statistically significantly greater improvement in the primary efficacy measure (HAMD<sub>17</sub> total score) compared with placebo-treated patients, by repeated measures analysis. Paroxetine-treated patients did not differ statistically significantly from the placebo group on this measure. Mean change analyses revealed the same results. Patients treated with duloxetine 40 mg BID showed statistically significantly greater improvement in scores on the primary efficacy measure (HAMD<sub>17</sub> total score) compared with paroxetine-treated patients at endpoint.

Patients treated with duloxetine 40 mg BID met the criteria for treatment response and remission at endpoint statistically significantly more frequently than did patients treated with placebo. Patients treated with either duloxetine 40 mg BID or paroxetine had statistically significantly shorter time to first response than did patients treated with placebo.

1  
2  
3  
4  
5  
6  
7  
8  
9  
10  
11  
12  
13  
14  
15  
16  
17  
18  
19  
20  
21  
22  
23  
24  
25  
26  
27  
28  
29  
30  
31  
32  
33  
34  
35  
36  
37  
38  
39  
40  
41  
42  
43  
44  
45  
46  
47  
48  
49  
50  
51  
52  
53  
54  
55  
56  
57  
58  
59  
60

Patients treated with duloxetine 40 mg BID showed statistically significantly greater improvement on the HAMD<sub>17</sub> subfactor scores of Anxiety/Somatization, Core Factor, Maier, and Retardation as compared with placebo-treated patients.

Patients treated with duloxetine 40 mg BID showed statistically significantly greater improvement on the MADRS total score compared with placebo-treated patients, by repeated measures analysis. Mean change analysis revealed the same result. Duloxetine 20 mg BID, paroxetine- and placebo-treated patients did not differ statistically significantly on this measure.

Patients treated with duloxetine 40 mg BID showed statistically significantly greater improvement on the HAMA scale compared with placebo-treated patients (despite the fact that this trial excluded patients with primary anxiety disorders). Mean change analyses revealed the same result. Paroxetine- and placebo-treated patients did not differ statistically significantly on this measure.

Patients treated with duloxetine 40 mg BID showed statistically significantly greater improvement on the Visual Analog Scale (VAS) for overall pain severity compared with placebo-treated patients, and showed marginally statistically significantly greater improvement on the VAS for amount of time in pain while awake. Mean change analyses revealed the same results.

Patients treated with duloxetine 40 mg BID showed statistically significantly greater improvement on the Quality of Life in Depression Scale (QLDS), and showed a statistically significantly greater percentage of patients with reductions in the types of health care providers visited and the number of visits to health care providers, compared with placebo-treated patients.

There were statistically significantly fewer discontinuations due to perceived lack of efficacy for patients treated with both doses of duloxetine compared with placebo-treated patients.

Using 2.2 as the noninferiority margin, it is shown that duloxetine 40 mg BID treatment was noninferior to paroxetine treatment using either repeated measure analysis or mean change analysis. In addition, even when using a more stringent noninferiority margin than 2.2 (namely, using one-half of the absolute gain of paroxetine over placebo), it remains true that duloxetine 40 mg BID treatment was noninferior to paroxetine treatment using repeated measures analysis.

#### **Safety — Acute Therapy Phase:**

Deaths/Serious Adverse Events/Discontinuations Due to Adverse Events: No patients died during this study. Two patients experienced serious adverse events postrandomization. One patient receiving duloxetine 40 mg BID had an accidental injury falling from a horse, suffering a concussion and a subsequent seizure. One patient receiving paroxetine relapsed into alcohol abuse, suffered alcohol withdrawal symptoms, and was admitted for detoxification. In the acute therapy phase 40 (11.3%) of 353 discontinued due to an adverse event. There were no statistically significant differences among treatment groups with respect to adverse events reported as a reason for discontinuation in the acute therapy phase. The percentages of patients who discontinued for any reason were similar among the four treatment groups.

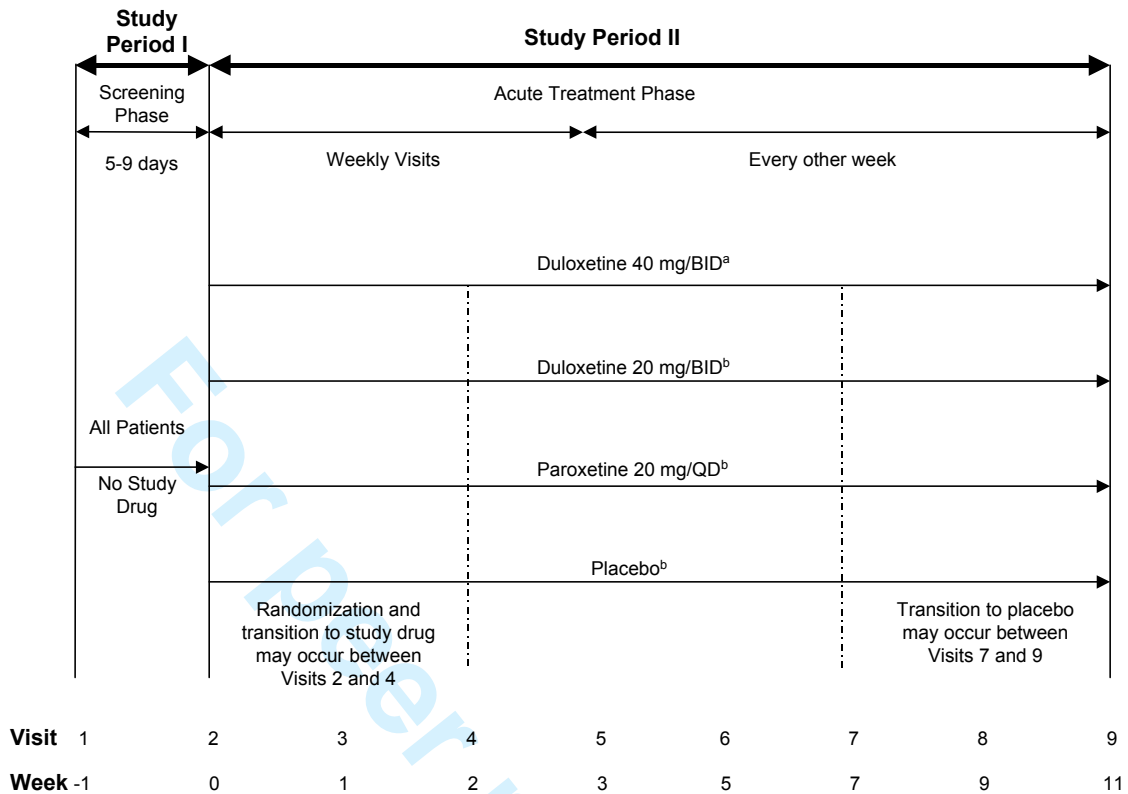

Figure HMAT.1. Illustration of study design for Protocol F1J-MC-HMAT.

Duloxetine Hydrochloride  
Copyright © 2004 Eli Lilly and Company. All rights reserved.

Approved by Lilly 16 November 2004

**Table HMA1b.1. Patient Characteristics at Baseline  
All Randomized Patients**

| Variable                     | PLACEBO<br>(N=89) | DLX20BID<br>(N=86) | DLX40BID<br>(N=91) | PRX20QD<br>(N=87) | Total<br>(N=353) | p-Value |
|------------------------------|-------------------|--------------------|--------------------|-------------------|------------------|---------|
| <b>AGE: YRS</b>              |                   |                    |                    |                   |                  |         |
| No. Patients                 | 89                | 86                 | 91                 | 87                | 353              | .949**  |
| Mean                         | 40.14             | 40.69              | 40.89              | 40.25             | 40.50            |         |
| Median                       | 41.28             | 40.05              | 40.83              | 39.25             | 40.29            |         |
| Standard Dev.                | 12.94             | 10.04              | 11.90              | 11.02             | 11.50            |         |
| Minimum                      | 20.07             | 20.56              | 18.20              | 19.18             | 18.20            |         |
| Maximum                      | 78.21             | 70.60              | 68.87              | 64.02             | 78.21            |         |
| <b>HEIGHT: CM (Visit: 1)</b> |                   |                    |                    |                   |                  |         |
| No. Patients                 | 89                | 85                 | 91                 | 87                | 352              | .556**  |
| Mean                         | 170.84            | 170.66             | 169.45             | 169.19            | 170.03           |         |
| Median                       | 170.18            | 167.64             | 167.64             | 170.18            | 167.64           |         |
| Standard Dev.                | 9.69              | 9.66               | 10.72              | 9.79              | 9.97             |         |
| Minimum                      | 152.40            | 152.40             | 139.70             | 149.86            | 139.70           |         |
| Maximum                      | 198.12            | 200.66             | 195.58             | 193.04            | 200.66           |         |
| Unspecified                  | 0                 | 1                  | 0                  | 0                 | 1                |         |
| <b>WEIGHT: KG (Visit: 1)</b> |                   |                    |                    |                   |                  |         |
| No. Patients                 | 88                | 86                 | 90                 | 87                | 351              | .071**  |
| Mean                         | 80.22             | 81.61              | 82.19              | 88.75             | 83.18            |         |
| Median                       | 77.86             | 78.09              | 81.95              | 79.00             | 79.00            |         |
| Standard Dev.                | 18.93             | 20.33              | 20.87              | 28.97             | 22.74            |         |
| Minimum                      | 45.40             | 51.76              | 43.58              | 45.40             | 43.58            |         |
| Maximum                      | 153.91            | 165.26             | 155.72             | 194.31            | 194.31           |         |
| Unspecified                  | 1                 | 0                  | 1                  | 0                 | 2                |         |

1  
2  
3  
4  
5  
6  
7  
8  
9  
10  
11  
12  
13  
14  
15  
16  
17  
18  
19  
20  
21  
22  
23  
24  
25  
26  
27  
28  
29  
30  
31  
32  
33  
34  
35  
36  
37  
38  
39  
40  
41  
42  
43  
44  
45  
46  
47  
48  
49

Duloxetine Hydrochloride  
Copyright © 2004 Eli Lilly and Company. All rights reserved.

Approved by Lilly 16 November 2004

**Table HMA**T**b.1. Patient Characteristics at Baseline  
All Randomized Patients (concluded)**

| Variable               | PLACEBO<br>(N=89) | DLX20BID<br>(N=86) | DLX40BID<br>(N=91) | PRX20QD<br>(N=87) | Total<br>(N=353) | p-Value |
|------------------------|-------------------|--------------------|--------------------|-------------------|------------------|---------|
| <b>ORIGIN: NO. (%)</b> |                   |                    |                    |                   |                  |         |
| No. Patients           | 89                | 86                 | 91                 | 87                | 353              | .270*   |
| African Descent        | 8 (9.0)           | 4 (4.7)            | 5 (5.5)            | 9 (10.3)          | 26 (7.4)         |         |
| Western Asian          | 0                 | 0                  | 0                  | 2 (2.3)           | 2 (0.6)          |         |
| Caucasian              | 74 (83.1)         | 72 (83.7)          | 77 (84.6)          | 64 (73.6)         | 287 (81.3)       |         |
| East/Southeast A       | 1 (1.1)           | 0                  | 0                  | 0                 | 1 (0.3)          |         |
| Hispanic               | 6 (6.7)           | 9 (10.5)           | 9 (9.9)            | 12 (13.8)         | 36 (10.2)        |         |
| Other                  | 0                 | 1 (1.2)            | 0                  | 0                 | 1 (0.3)          |         |
| <b>GENDER: NO. (%)</b> |                   |                    |                    |                   |                  |         |
| No. Patients           | 89                | 86                 | 91                 | 87                | 353              | .633*   |
| Female                 | 57 (64.0)         | 48 (55.8)          | 56 (61.5)          | 56 (64.4)         | 217 (61.5)       |         |
| Male                   | 32 (36.0)         | 38 (44.2)          | 35 (38.5)          | 31 (35.6)         | 136 (38.5)       |         |

Output stored as RMP.FIJO.HMAT.FINALB(DE128006)  
Data from RMP.SAS.FIJM.MCHMATSW.STUDYB  
\* Frequencies are analyzed using a Chi-Square test.  
\*\* Means are analyzed using a Type III Sum of Squares analysis of variance  
(ANOVA): PROC GLM model=investigator and treatment.  
XDES0001



Duloxetine Hydrochloride  
Copyright © 2004 Eli Lilly and Company. All rights reserved.

Approved by Lilly 16 November 2004

**Table HMA**T**b.2. Summary of Efficacy and Health Outcome Measures**  
**Mean Change from Baseline to Endpoint/Last Observation**  
**All Randomized Patients**  
**Acute Therapy Phase F1J-MC-HMATb**

| Variable                                  | Treatment Group |              |                           |              | p-Value             |                     |                     |
|-------------------------------------------|-----------------|--------------|---------------------------|--------------|---------------------|---------------------|---------------------|
|                                           | Placebo         | Dulox 20 BID | Dulox 40 BID              | Parox 20 QD  | Dulox 20 vs placebo | Dulox 40 vs placebo | Parox 20 vs placebo |
| <b>HAMD<sub>17</sub> Total Score</b>      | n=88            | n=84         | n=86                      | n=84         |                     |                     |                     |
| Mean Baseline (SD)                        | 17.19 (5.11)    | 18.63 (5.85) | 18.06 (4.52)              | 17.65 (5.13) |                     |                     |                     |
| Mean Change (SD)                          | -4.16 (6.42)    | -7.17 (7.97) | -7.72 (7.67)              | -6.06 (8.12) | p=.022              | p=.003              | p=.150              |
| LS Mean Change (SE)                       | -4.99 (0.81)    | -7.42 (0.80) | -8.61 (0.81) <sup>a</sup> | -6.22 (0.82) | p=.034              | p=.002              | p=.285              |
| <b>HAMD<sub>17</sub> Response Rate</b>    | n=88            | n=84         | n=86                      | n=84         |                     |                     |                     |
| Responders n (%)                          | 27 (31%)        | 37 (44%)     | 44 (51%)                  | 34 (40%)     | .083                | .009                | .204                |
| <b>HAMD<sub>17</sub> Remission Rate</b>   | n=88            | n=84         | n=86                      | n=84         |                     |                     |                     |
| Remitters n (%)                           | 26 (30%)        | 29 (35%)     | 43 (50%)                  | 31 (37%)     | .516                | .008                | .334                |
| <b>HAMD<sub>17</sub> Subscale – Core</b>  | n=88            | n=84         | n=86                      | n=84         |                     |                     |                     |
| Mean Baseline (SD)                        | 7.43 (2.64)     | 8.05 (2.53)  | 7.36 (2.14)               | 7.65 (2.43)  |                     |                     |                     |
| Mean Change (SD)                          | -2.02 (3.39)    | -3.37 (3.53) | -3.40 (3.14)              | -3.00 (3.87) | p=.023              | p=.008              | p=.110              |
| LS Mean Change (SE)                       | -2.64 (0.39)    | -3.66 (0.38) | -4.00 (0.39)              | -3.24 (0.39) | p=.060              | p=.013              | p=.271              |
| <b>HAMD<sub>17</sub> Subscale – Maier</b> | n=88            | n=84         | n=86                      | n=84         |                     |                     |                     |
| Mean Baseline (SD)                        | 9.26 (3.00)     | 9.88 (3.01)  | 9.47 (2.28)               | 9.33 (2.64)  |                     |                     |                     |
| Mean Change (SD)                          | -2.53 (3.56)    | -4.04 (4.25) | -4.30 (3.90)              | -3.75 (4.33) | p=.028              | p=.004              | p=.057              |
| LS Mean Change (SE)                       | -3.06 (0.44)    | -4.18 (0.43) | -4.79 (0.44)              | -4.03 (0.44) | p=.068              | p=.005              | p=.115              |

Duloxetine Hydrochloride  
Copyright © 2004 Eli Lilly and Company. All rights reserved.

Approved by Lilly 16 November 2004

**Table HMATb.2. Summary of Efficacy and Health Outcome Measures**  
**Mean Change from Baseline to Endpoint/Last Observation**  
**All Randomized Patients**  
**Acute Therapy Phase F1J-MC-HMATb (continued)**

| Variable                                                     | Treatment Group |              |                           |              | p-Value             |                     |                     |
|--------------------------------------------------------------|-----------------|--------------|---------------------------|--------------|---------------------|---------------------|---------------------|
|                                                              | Placebo         | Dulox 20 BID | Dulox 40 BID              | Parox 20 QD  | Dulox 20 vs placebo | Dulox 40 vs placebo | Parox 20 vs placebo |
| <b>HAMD<sub>17</sub> Subscale – Anxiety/Somatization</b>     | n=88            | n=84         | n=86                      | n=84         |                     |                     |                     |
| Mean Baseline (SD)                                           | 5.48 (2.12)     | 6.04 (2.52)  | 6.07 (1.82)               | 5.85 (2.41)  |                     |                     |                     |
| Mean Change (SD)                                             | -1.06 (2.49)    | -2.17 (3.08) | -2.79 (2.72)              | -2.13 (3.23) | p=.046              | p=<.001             | p=.040              |
| LS Mean Change (SE)                                          | -1.38 (0.29)    | -2.11 (0.28) | -2.92 (0.28) <sup>a</sup> | -2.11 (0.29) | p=.066              | p=<.001             | p=.069              |
| <b>HAMD<sub>17</sub> Subscale – Retardation/Somatization</b> | n=88            | n=84         | n=86                      | n=84         |                     |                     |                     |
| Mean Baseline (SD)                                           | 6.38 (1.97)     | 6.96 (2.11)  | 6.34 (1.75)               | 6.81 (1.95)  |                     |                     |                     |
| Mean Change (SD)                                             | -1.80 (2.84)    | -2.80 (3.03) | -2.63 (2.80)              | -2.45 (3.15) | p=.047              | p=.053              | p=.263              |
| LS Mean Change (SE)                                          | -2.32 (0.32)    | -3.08 (0.32) | -3.22 (0.32)              | -2.59 (0.33) | p=.092              | p=.046              | p=.546              |
| <b>HAMD<sub>17</sub> Subscale – Sleep</b>                    | n=88            | n=84         | n=86                      | n=84         |                     |                     |                     |
| Mean Baseline (SD)                                           | 2.67 (1.87)     | 2.76 (1.86)  | 2.85 (1.82)               | 2.54 (1.85)  |                     |                     |                     |
| Mean Change (SD)                                             | -0.81 (1.91)    | -1.05 (2.04) | -1.02 (2.29)              | -0.69 (2.16) | p=.485              | p=.769              | p=.827              |
| LS Mean Change (SE)                                          | -0.84 (0.21)    | -1.04 (0.20) | -1.14 (0.21)              | -0.65 (0.21) | p=.483              | p=.303              | p=.503              |

Duloxetine Hydrochloride  
Copyright © 2004 Eli Lilly and Company. All rights reserved.

Approved by Lilly 16 November 2004

**Table HMA**T**b.2. Summary of Efficacy and Health Outcome Measures**  
**Mean Change from Baseline to Endpoint/Last Observation**  
**All Randomized Patients**  
**Acute Therapy Phase F1J-MC-HMATb (continued)**

| Variable                               | Treatment Group |               |               |               | p-Value                |                        |                        |
|----------------------------------------|-----------------|---------------|---------------|---------------|------------------------|------------------------|------------------------|
|                                        | Placebo         | Dulox 20 BID  | Dulox 40 BID  | Parox 20 QD   | Dulox 20<br>vs placebo | Dulox 40<br>vs placebo | Parox 20<br>vs placebo |
| <b>HAMD<sub>17</sub> Item #1 Score</b> | n=88            | n=84          | n=86          | n=84          |                        |                        |                        |
| Mean Baseline (SD)                     | 2.32 (0.89)     | 2.52 (0.80)   | 2.24 (0.77)   | 2.37 (0.79)   |                        |                        |                        |
| Mean Change (SD)                       | -0.67 (1.24)    | -1.08 (1.19)  | -0.95 (1.02)  | -0.96 (1.31)  | p=.054                 | p=.065                 | p=.122                 |
| LS Mean Change (SE)                    | -0.89 (0.13)    | -1.15 (0.13)  | -1.16 (0.13)  | -1.11 (0.13)  | p=.174                 | p=.152                 | p=.255                 |
| <b>MADRS</b>                           | n=88            | n=84          | n=86          | n=84          |                        |                        |                        |
| Mean Baseline (SD)                     | 22.72 (8.00)    | 24.44 (8.05)  | 22.58 (6.21)  | 23.07 (7.51)  |                        |                        |                        |
| Mean Change (SD)                       | -5.75 (9.19)    | -9.11 (11.50) | -8.99 (10.08) | -8.51 (11.91) | p=.082                 | p=.029                 | p=.105                 |
| LS Mean Change (SE)                    | -7.43 (1.15)    | -9.37 (1.14)  | -10.73 (1.16) | -9.01 (1.17)  | p=.227                 | p=.042                 | p=.331                 |
| <b>CGI-Severity</b>                    | n=88            | n=84          | n=87          | n=85          |                        |                        |                        |
| Mean Baseline (SD)                     | 4.11 (0.73)     | 4.19 (0.80)   | 4.10 (0.51)   | 4.02 (0.62)   |                        |                        |                        |
| Mean Change (SD)                       | -0.88 (1.21)    | -1.19 (1.38)  | -1.20 (1.26)  | -1.06 (1.39)  | p=.135                 | p=.078                 | p=.262                 |
| LS Mean Change (SE)                    | -1.10 (0.15)    | -1.36 (0.15)  | -1.42 (0.16)  | -1.25 (0.16)  | p=.242                 | p=.153                 | p=.507                 |

Duloxetine Hydrochloride  
Copyright © 2004 Eli Lilly and Company. All rights reserved.

Approved by Lilly 16 November 2004

**Table HMATb.2. Summary of Efficacy and Health Outcome Measures**  
**Mean Change from Baseline to Endpoint/Last Observation**  
**All Randomized Patients**  
**Acute Therapy Phase F1J-MC-HMATb (concluded)**

| Variable               | Treatment Group |              |               |               | p-Value             |                     |                     |
|------------------------|-----------------|--------------|---------------|---------------|---------------------|---------------------|---------------------|
|                        | Placebo         | Dulox 20 BID | Dulox 40 BID  | Parox 20 QD   | Dulox 20 vs placebo | Dulox 40 vs placebo | Parox 20 vs placebo |
| <b>PGI-Improvement</b> | n=88            | n=84         | n=86          | n=85          |                     |                     |                     |
| Mean Baseline (SD)     | n/a             | n/a          | n/a           | n/a           |                     |                     |                     |
| Endpoint Mean (SD)     | 3.24 (1.41)     | 2.93 (1.31)  | 2.86 (1.47)   | 2.99 (1.44)   | p=.162              | p=.079              | p=.253              |
| Endpoint LS Mean (SE)  | 2.87 (0.15)     | 2.74 (0.15)  | 2.52 (0.15)   | 2.80 (0.15)   | p=.522              | p=.093              | p=.743              |
| <b>HAMA</b>            | n=88            | n=84         | n=86          | n=84          |                     |                     |                     |
| Mean Baseline (SD)     | 14.48 (5.33)    | 15.25 (5.86) | 14.88 (4.87)  | 14.49 (5.76)  |                     |                     |                     |
| Mean Change (SD)       | -3.49 (5.32)    | -5.13 (6.74) | -5.86 (7.14)  | -4.60 (7.36)  | p=.149              | p=.019              | p=.257              |
| LS Mean Change (SE)    | -4.33 (0.69)    | -5.45 (0.68) | -6.57 (0.69)  | -5.23 (0.69)  | p=.238              | p=.020              | p=.349              |
| <b>QLDS</b>            | n=80            | n=76         | n=78          | n=72          |                     |                     |                     |
| Mean Baseline (SD)     | 15.21 (7.32)    | 19.92 (7.37) | 17.22 (7.67)  | 17.60 (8.49)  |                     |                     |                     |
| Mean Change (SD)       | -4.30 (8.21)    | -9.29 (8.61) | -8.55 (9.39)  | -7.96 (10.26) | p=.069              | p=.023              | p=.084              |
| LS Mean Change (SE)    | -7.87 (1.07)    | -8.90 (1.04) | -10.76 (1.05) | -9.85 (1.04)  | p=.483              | p=.050              | p=.178              |

Abbreviations: CGI-Severity = Clinical Global Impressions of Severity; HAMA = Hamilton Anxiety Rating Scale; HAMD<sub>17</sub> = 17-Item Hamilton Depression Rating Scale; MADRS = Montgomery and Asberg Depression Rating Scale; PGI-Improvement = Patient's Global Impressions of Improvement; Dulox 20 BID = duloxetine 20 mg twice daily; Dulox 40 BID = duloxetine 40 mg twice daily; Parox 20 QD = paroxetine 20 mg once daily; QLDS = Quality of Life in Depression Scale; SD = standard deviation; SE = standard error.

Note: n = the number of patients who had a baseline score and at least one nonmissing postbaseline score for that particular variable

Note: "n/a" in Global Impressions of Improvement scales indicates that a baseline score is not collected in this type of scale

Note: Mean Change – Data from mean change analysis

Note: LS Mean Change – Data from repeated measures analysis

<sup>a</sup> Result was statistically significant (p<.05) compared with paroxetine 20 mg QD

Duloxetine Hydrochloride  
 Copyright © 2004 Eli Lilly and Company. All rights reserved.

Approved by Lilly 16 November 2004

**Table HMATb.3. Summary of Somatic and Pain Measures**  
**Mean Change from Baseline to Endpoint/Last Observation**  
**All Randomized Patients**  
**Acute Therapy Phase F1J-MC-HMATb**

| Variable                            | Treatment Group |               |                |               | p-Value             |                     |                     |
|-------------------------------------|-----------------|---------------|----------------|---------------|---------------------|---------------------|---------------------|
|                                     | Placebo         | Dulox 20 BID  | Dulox 40 BID   | Parox 20 QD   | Dulox 20 vs placebo | Dulox 40 vs placebo | Parox 20 vs placebo |
| <b>SSI 26-Item Average</b>          | n=88            | n=82          | n=86           | n=85          |                     |                     |                     |
| Mean Baseline (SD)                  | 1.68 (0.55)     | 1.71 (0.51)   | 1.71 (0.55)    | 1.71 (0.47)   |                     |                     |                     |
| Mean Change (SD)                    | -0.13 (0.47)    | -0.13 (0.35)  | -0.17 (0.46)   | -0.17 (0.47)  | p=.700              | p=.875              | p=.732              |
| LS Mean Change (SE)                 | -0.18 (0.05)    | -0.15 (0.05)  | -0.22 (0.05)   | -0.22 (0.05)  | p=.620              | p=.621              | p=.540              |
| <b>SSI 28-Item Average</b>          | n=88            | n=82          | n=86           | n=85          |                     |                     |                     |
| Mean Baseline (SD)                  | 1.69 (0.56)     | 1.72 (0.51)   | 1.74 (0.57)    | 1.72 (0.49)   |                     |                     |                     |
| Mean Change (SD)                    | -0.13 (0.47)    | -0.13 (0.35)  | -0.19 (0.46)   | -0.17 (0.47)  | p=.703              | p=.640              | p=.740              |
| LS Mean Change (SE)                 | -0.18 (0.05)    | -0.15 (0.05)  | -0.24 (0.05)   | -0.22 (0.05)  | p=.636              | p=.409              | p=.581              |
| <b>VAS-Severity of Overall Pain</b> | n=88            | n=84          | n=86           | n=85          |                     |                     |                     |
| Mean Baseline (SD)                  | 24.18 (25.99)   | 27.02 (25.39) | 25.55 (22.83)  | 22.22 (22.48) |                     |                     |                     |
| Mean Change (SD)                    | -3.20 (27.17)   | -6.44 (23.30) | -10.34 (22.52) | -8.06 (20.26) | p=.710              | p=.048              | p=.071              |
| LS Mean Change (SE)                 | -4.09 (2.49)    | -5.08 (2.42)  | -11.44 (2.49)  | -9.63 (2.51)  | p=.771              | p=.035              | p=.113              |

1  
2  
3  
4  
5  
6  
7  
8  
9  
10  
11  
12  
13  
14  
15  
16  
17  
18  
19  
20  
21  
22  
23  
24  
25  
26  
27  
28  
29  
30  
31  
32  
33  
34  
35  
36  
37  
38  
39  
40  
41  
42  
43  
44  
45  
46  
47  
48  
49

Duloxetine Hydrochloride  
Copyright © 2004 Eli Lilly and Company. All rights reserved.

Approved by Lilly 16 November 2004

**Table HMA**T**b.3. Summary of Somatic and Pain Measures**  
**Mean Change from Baseline to Endpoint/Last Observation**  
**All Randomized Patients**  
**Acute Therapy Phase F1J-MC-HMATb (continued)**

| Variable                             | Treatment Group |               |               |               | p-Value             |                     |                     |
|--------------------------------------|-----------------|---------------|---------------|---------------|---------------------|---------------------|---------------------|
|                                      | Placebo         | Dulox 20 BID  | Dulox 40 BID  | Parox 20 QD   | Dulox 20 vs placebo | Dulox 40 vs placebo | Parox 20 vs placebo |
| <b>VAS-Severity of Headaches</b>     | n=88            | n=84          | n=86          | n=84          |                     |                     |                     |
| Mean Baseline (SD)                   | 23.68 (28.58)   | 20.63 (23.70) | 22.42 (23.30) | 16.05 (20.63) |                     |                     |                     |
| Mean Change (SD)                     | -6.17 (25.39)   | -3.36 (22.70) | -7.99 (24.03) | -3.40 (23.08) | p=.677              | p=.470              | p=.603              |
| LS Mean Change (SE)                  | -6.25 (2.30)    | -5.56 (2.23)  | -7.90 (2.30)  | -6.83 (2.32)  | p=.828              | p=.607              | p=.859              |
| <b>VAS-Severity of Back Pain</b>     | n=88            | n=84          | n=86          | n=85          |                     |                     |                     |
| Mean Baseline (SD)                   | 17.23 (22.76)   | 22.31 (26.11) | 20.19 (24.61) | 15.87 (18.07) |                     |                     |                     |
| Mean Change (SD)                     | -1.19 (25.30)   | -6.88 (21.83) | -8.31 (24.05) | -3.36 (20.01) | p=.414              | p=.094              | p=.387              |
| LS Mean Change (SE)                  | -2.48 (2.41)    | -5.06 (2.35)  | -7.67 (2.41)  | -4.19 (2.43)  | p=.439              | p=.124              | p=.612              |
| <b>VAS-Severity of Shoulder Pain</b> | n=88            | n=84          | n=86          | n=84          |                     |                     |                     |
| Mean Baseline (SD)                   | 14.64 (23.56)   | 12.65 (19.58) | 15.98 (22.24) | 13.68 (22.73) |                     |                     |                     |
| Mean Change (SD)                     | -2.40 (20.09)   | -2.07 (19.53) | -7.97 (21.61) | -2.71 (22.95) | p=.899              | p=.081              | p=.907              |
| LS Mean Change (SE)                  | -2.34 (2.26)    | -2.98 (2.19)  | -5.67 (2.26)  | -0.82 (2.26)  | p=.837              | p=.292              | p=.631              |

Duloxetine Hydrochloride  
Copyright © 2004 Eli Lilly and Company. All rights reserved.

Approved by Lilly 16 November 2004

**Table HMATb.3. Summary of Somatic and Pain Measures**  
**Mean Change from Baseline to Endpoint/Last Observation**  
**All Randomized Patients**  
**Acute Therapy Phase F1J-MC-HMATb (concluded)**

| Variable                                      | Treatment Group |               |                |               | p-Value             |                     |                     |
|-----------------------------------------------|-----------------|---------------|----------------|---------------|---------------------|---------------------|---------------------|
|                                               | Placebo         | Dulox 20 BID  | Dulox 40 BID   | Parox 20 QD   | Dulox 20 vs placebo | Dulox 40 vs placebo | Parox 20 vs placebo |
| <b>VAS-Interference with Daily Activities</b> | n=88            | n=84          | n=86           | n=85          |                     |                     |                     |
| Mean Baseline (SD)                            | 17.14 (25.42)   | 19.52 (24.66) | 17.00 (21.00)  | 15.62 (20.91) |                     |                     |                     |
| Mean Change (SD)                              | -3.38 (26.49)   | -1.94 (26.44) | -4.90 (25.39)  | -3.29 (20.77) | p=.261              | p=.687              | p=.915              |
| LS Mean Change (SE)                           | -4.31 (2.53)    | -0.57 (2.45)  | -6.79 (2.52)   | -4.24 (2.53)  | p=.281              | p=.482              | p=.983              |
| <b>VAS-Pain While Awake</b>                   | n=88            | n=84          | n=86           | n=84          |                     |                     |                     |
| Mean Baseline (SD)                            | 25.73 (28.05)   | 34.93 (32.52) | 29.23 (27.28)  | 28.30 (30.51) |                     |                     |                     |
| Mean Change (SD)                              | -1.95 (30.33)   | -8.18 (31.49) | -10.99 (32.23) | -8.10 (32.52) | p=.787              | p=.078              | p=.269              |
| LS Mean Change (SE)                           | -2.43 (3.32)    | -2.70 (3.23)  | -11.36 (3.31)  | -6.02 (3.33)  | p=.952              | p=.055              | p=.440              |

Abbreviations: Dulox 20 BID = duloxetine 20 mg twice daily; Dulox 40 BID = duloxetine 40 mg twice daily; Parox 20 QD = paroxetine 20 mg once daily; SSI = Somatic Symptom Inventory; VAS = Visual Analog Scales

Note: n = the number of patients who had a baseline score and at least one nonmissing postbaseline score for that particular variable

Note: Mean Change – Data from mean change analysis

Note: LS Mean Change – Data from repeated measures analysis

Duloxetine Hydrochloride  
Copyright © 2004 Eli Lilly and Company. All rights reserved.

Approved by Lilly 16 November 2004

**Table HMATb.4. Treatment-Emergent Adverse Events with Incidence Greater than or Equal to 2 Percent  
All Randomized Patients  
Acute Therapy Phase**

|                         | PLACEBO       | DLX20BID      | DLX40BID      | PRX20QD       | Total          | -----p-Values*----- |       |       |      |      |      |      |
|-------------------------|---------------|---------------|---------------|---------------|----------------|---------------------|-------|-------|------|------|------|------|
|                         | N=89<br>n (%) | N=86<br>n (%) | N=91<br>n (%) | N=87<br>n (%) | N=353<br>n (%) | Overall             | 1vs2  | 1vs3  | 1vs4 | 2vs3 | 2vs4 | 3vs4 |
| PATIENTS WITH >= 1 TESS | 61 (68.5)     | 73 (84.9)     | 76 (83.5)     | 76 (87.4)     | 286 (81.0)     | .009                | .013  | .023  | .003 | .839 | .666 | .528 |
| NAUSEA                  | 2 ( 2.2)      | 19 (22.1)     | 23 (25.3)     | 14 (16.1)     | 58 (16.4)      | <.001               | <.001 | <.001 | .001 | .724 | .339 | .143 |
| HEADACHE                | 10 (11.2)     | 12 (14.0)     | 17 (18.7)     | 10 (11.5)     | 49 (13.9)      | .470                | .652  | .211  | 1.00 | .423 | .655 | .213 |
| INSOMNIA                | 5 ( 5.6)      | 15 (17.4)     | 18 (19.8)     | 7 ( 8.0)      | 45 (12.7)      | .008                | .017  | .006  | .564 | .705 | .072 | .031 |
| RHINITIS                | 15 (16.9)     | 7 ( 8.1)      | 5 ( 5.5)      | 7 ( 8.0)      | 34 ( 9.6)      | .075                | .110  | .018  | .110 | .558 | 1.00 | .560 |
| SOMNOLENCE              | 2 ( 2.2)      | 15 (17.4)     | 10 (11.0)     | 7 ( 8.0)      | 34 ( 9.6)      | .005                | <.001 | .033  | .098 | .281 | .072 | .613 |
| DIZZINESS               | 5 ( 5.6)      | 4 ( 4.7)      | 15 (16.5)     | 9 (10.3)      | 33 ( 9.3)      | .032                | 1.00  | .031  | .278 | .014 | .248 | .276 |
| DRY MOUTH               | 3 ( 3.4)      | 9 (10.5)      | 14 (15.4)     | 7 ( 8.0)      | 33 ( 9.3)      | .042                | .077  | .009  | .209 | .377 | .611 | .165 |
| DIARRHEA                | 7 ( 7.9)      | 7 ( 8.1)      | 8 ( 8.8)      | 10 (11.5)     | 32 ( 9.1)      | .851                | 1.00  | 1.00  | .454 | 1.00 | .611 | .624 |
| CONSTIPATION            | 3 ( 3.4)      | 7 ( 8.1)      | 8 ( 8.8)      | 12 (13.8)     | 30 ( 8.5)      | .095                | .207  | .212  | .015 | 1.00 | .331 | .346 |
| PAIN                    | 10 (11.2)     | 6 ( 7.0)      | 3 ( 3.3)      | 6 ( 6.9)      | 25 ( 7.1)      | .230                | .434  | .047  | .433 | .319 | 1.00 | .322 |
| SWEATING                | 0 ( 0.0)      | 8 ( 9.3)      | 11 (12.1)     | 6 ( 6.9)      | 25 ( 7.1)      | .003                | .003  | <.001 | .013 | .631 | .590 | .310 |
| ASTHENIA                | 2 ( 2.2)      | 8 ( 9.3)      | 9 ( 9.9)      | 4 ( 4.6)      | 23 ( 6.5)      | .102                | .055  | .058  | .441 | 1.00 | .248 | .250 |
| DYSPEPSIA               | 6 ( 6.7)      | 3 ( 3.5)      | 6 ( 6.6)      | 6 ( 6.9)      | 21 ( 5.9)      | .743                | .497  | 1.00  | 1.00 | .498 | .496 | 1.00 |
| BACK PAIN               | 6 ( 6.7)      | 7 ( 8.1)      | 3 ( 3.3)      | 3 ( 3.4)      | 19 ( 5.4)      | .408                | .779  | .327  | .497 | .202 | .211 | 1.00 |
| ANOREXIA                | 1 ( 1.1)      | 4 ( 4.7)      | 10 (11.0)     | 3 ( 3.4)      | 18 ( 5.1)      | .028                | .205  | .009  | .365 | .164 | .720 | .082 |
| VASODILATATION          | 2 ( 2.2)      | 7 ( 8.1)      | 6 ( 6.6)      | 2 ( 2.3)      | 17 ( 4.8)      | .158                | .096  | .278  | 1.00 | .778 | .099 | .279 |
| ABDOMINAL PAIN          | 2 ( 2.2)      | 6 ( 7.0)      | 4 ( 4.4)      | 3 ( 3.4)      | 15 ( 4.2)      | .457                | .164  | .682  | .680 | .527 | .329 | 1.00 |
| COUGH INCREASED         | 5 ( 5.6)      | 3 ( 3.5)      | 3 ( 3.3)      | 4 ( 4.6)      | 15 ( 4.2)      | .886                | .720  | .494  | 1.00 | 1.00 | 1.00 | .716 |
| LIBIDO DECREASED        | 1 ( 1.1)      | 4 ( 4.7)      | 7 ( 7.7)      | 3 ( 3.4)      | 15 ( 4.2)      | .163                | .205  | .064  | .365 | .537 | .720 | .331 |
| VOMITING                | 1 ( 1.1)      | 6 ( 7.0)      | 5 ( 5.5)      | 3 ( 3.4)      | 15 ( 4.2)      | .203                | .061  | .211  | .365 | .762 | .329 | .721 |
| MYALGIA                 | 4 ( 4.5)      | 4 ( 4.7)      | 3 ( 3.3)      | 3 ( 3.4)      | 14 ( 4.0)      | .933                | 1.00  | .719  | 1.00 | .714 | .720 | 1.00 |
| NERVOUSNESS             | 2 ( 2.2)      | 4 ( 4.7)      | 5 ( 5.5)      | 1 ( 1.1)      | 12 ( 3.4)      | .355                | .438  | .444  | 1.00 | 1.00 | .211 | .211 |
| AMBLYOPIA               | 1 ( 1.1)      | 1 ( 1.2)      | 6 ( 6.6)      | 3 ( 3.4)      | 11 ( 3.1)      | .159                | 1.00  | .118  | .365 | .119 | .621 | .497 |
| ANORGASMIA              | 0 ( 0.0)      | 4 ( 4.7)      | 4 ( 4.4)      | 3 ( 3.4)      | 11 ( 3.1)      | .174                | .056  | .121  | .119 | 1.00 | .720 | 1.00 |
| ANXIETY                 | 0 ( 0.0)      | 4 ( 4.7)      | 3 ( 3.3)      | 4 ( 4.6)      | 11 ( 3.1)      | .172                | .056  | .246  | .058 | .714 | 1.00 | .716 |
| PARESTHESIA             | 4 ( 4.5)      | 1 ( 1.2)      | 2 ( 2.2)      | 4 ( 4.6)      | 11 ( 3.1)      | .485                | .368  | .441  | 1.00 | 1.00 | .368 | .436 |
| ACCIDENTAL INJURY       | 0 ( 0.0)      | 5 ( 5.8)      | 2 ( 2.2)      | 3 ( 3.4)      | 10 ( 2.8)      | .091                | .027  | .497  | .119 | .268 | .496 | .677 |
| PHARYNGITIS             | 5 ( 5.6)      | 2 ( 2.3)      | 1 ( 1.1)      | 2 ( 2.3)      | 10 ( 2.8)      | .380                | .444  | .116  | .444 | .612 | 1.00 | .615 |
| ABNORMAL DREAMS         | 0 ( 0.0)      | 2 ( 2.3)      | 2 ( 2.2)      | 5 ( 5.7)      | 9 ( 2.5)       | .119                | .240  | .497  | .028 | 1.00 | .443 | .270 |

(1) = PLACEBO, (2) = DLX20BID, (3) = DLX40BID, (4) = PRX20QD  
\*p-Values are from Fisher's Exact test.



Duloxetine Hydrochloride  
 Copyright © 2004 Eli Lilly and Company. All rights reserved.

Approved by Lilly 16 November 2004

**Table HMA**T**.4. Treatment-Emergent Adverse Events with Incidence Greater than or Equal to 2 Percent  
 All Randomized Patients  
 Acute Therapy Phase (concluded)**

|                      | PLACEBO<br>N=89<br>n (%) | DLX20BID<br>N=86<br>n (%) | DLX40BID<br>N=91<br>n (%) | PRX20QD<br>N=87<br>n (%) | Total<br>N=353<br>n (%) | -----p-Values*----- |      |      |      |      |      |      |
|----------------------|--------------------------|---------------------------|---------------------------|--------------------------|-------------------------|---------------------|------|------|------|------|------|------|
|                      |                          |                           |                           |                          |                         | Overall             | 1vs2 | 1vs3 | 1vs4 | 2vs3 | 2vs4 | 3vs4 |
| ABNORMAL EJACULATION | 1 ( 1.1)                 | 2 ( 2.3)                  | 2 ( 2.2)                  | 4 ( 4.6)                 | 9 ( 2.5)                | .539                | .616 | 1.00 | .208 | 1.00 | .682 | .436 |
| IMPOTENCE            | 0 ( 0.0)                 | 4 ( 4.7)                  | 2 ( 2.2)                  | 3 ( 3.4)                 | 9 ( 2.5)                | .165                | .056 | .497 | .119 | .434 | .720 | .677 |
| TREMOR               | 1 ( 1.1)                 | 3 ( 3.5)                  | 2 ( 2.2)                  | 3 ( 3.4)                 | 9 ( 2.5)                | .682                | .362 | 1.00 | .365 | .675 | 1.00 | .677 |
| FLATULENCE           | 1 ( 1.1)                 | 2 ( 2.3)                  | 1 ( 1.1)                  | 4 ( 4.6)                 | 8 ( 2.3)                | .424                | .616 | 1.00 | .208 | .612 | .682 | .203 |
| PALPITATION          | 2 ( 2.2)                 | 2 ( 2.3)                  | 2 ( 2.2)                  | 2 ( 2.3)                 | 8 ( 2.3)                | 1.000               | 1.00 | 1.00 | 1.00 | 1.00 | 1.00 | 1.00 |
| RASH                 | 3 ( 3.4)                 | 1 ( 1.2)                  | 4 ( 4.4)                  | 0 ( 0.0)                 | 8 ( 2.3)                | .195                | .621 | 1.00 | .246 | .369 | .497 | .121 |
| TINNITUS             | 1 ( 1.1)                 | 4 ( 4.7)                  | 2 ( 2.2)                  | 1 ( 1.1)                 | 8 ( 2.3)                | .436                | .205 | 1.00 | 1.00 | .434 | .211 | 1.00 |
| NECK PAIN            | 0 ( 0.0)                 | 4 ( 4.7)                  | 3 ( 3.3)                  | 0 ( 0.0)                 | 7 ( 2.0)                | .031                | .056 | .246 |      | .714 | .059 | .246 |
| PRURITUS             | 2 ( 2.2)                 | 2 ( 2.3)                  | 1 ( 1.1)                  | 2 ( 2.3)                 | 7 ( 2.0)                | .881                | 1.00 | .619 | 1.00 | .612 | 1.00 | .615 |
| THINKING ABNORMAL    | 0 ( 0.0)                 | 1 ( 1.2)                  | 5 ( 5.5)                  | 1 ( 1.1)                 | 7 ( 2.0)                | .067                | .491 | .059 | .494 | .212 | 1.00 | .211 |
| TWITCHING            | 1 ( 1.1)                 | 3 ( 3.5)                  | 2 ( 2.2)                  | 1 ( 1.1)                 | 7 ( 2.0)                | .630                | .362 | 1.00 | 1.00 | .675 | .368 | 1.00 |
| URINARY FREQUENCY    | 0 ( 0.0)                 | 3 ( 3.5)                  | 2 ( 2.2)                  | 2 ( 2.3)                 | 7 ( 2.0)                | .398                | .117 | .497 | .243 | .675 | .682 | 1.00 |

**Table HMATb.5. Laboratory Data - Chemistry Analytes  
Analytes with Statistically Significant Mean Change From  
Baseline to Endpoint Values  
All Randomized Patients  
Acute Therapy Phase**

| Lab Test | Lab Unit | Therapy  | n    | Change to          |                    |          |       | Therapy (Int*1) | Pair-wise*2 |
|----------|----------|----------|------|--------------------|--------------------|----------|-------|-----------------|-------------|
|          |          |          |      | -----Baseline----- | -----Endpoint----- | p-Values |       |                 |             |
|          |          |          | Mean | SD                 | Mean               | SD       |       |                 |             |
| AST      | U/L      | PLACEBO  | 86   | 24.29              | 10.86              | -2.05    | 10.11 | .008            |             |
|          |          | DLX20BID | 81   | 22.68              | 7.44               | 3.17     | 10.60 | (.475)          | .001        |
|          |          | DLX40BID | 81   | 22.67              | 10.21              | 1.25     | 8.03  |                 | .010        |
|          |          | PRX20QD  | 78   | 23.54              | 10.55              | 1.47     | 10.88 |                 | .015        |
| ALT      | U/L      | PLACEBO  | 86   | 27.73              | 20.40              | -3.56    | 13.73 | .002            |             |
|          |          | DLX20BID | 81   | 25.48              | 15.69              | 4.15     | 18.93 | (.480)          | .004        |
|          |          | DLX40BID | 81   | 24.37              | 17.50              | 3.86     | 13.69 |                 | <.001       |
|          |          | PRX20QD  | 78   | 28.51              | 20.92              | -0.53    | 15.77 |                 | .070        |
| CPK      | U/L      | PLACEBO  | 86   | 192.0              | 673.6              | -55.6    | 427.5 | .013            |             |
|          |          | DLX20BID | 81   | 126.6              | 89.0               | 30.9     | 115.1 | (.813)          | .040        |
|          |          | DLX40BID | 81   | 123.8              | 101.5              | -6.7     | 129.3 |                 | .599        |
|          |          | PRX20QD  | 78   | 111.0              | 63.8               | 31.8     | 173.0 |                 | .039        |
| ALKPH    | U/L      | PLACEBO  | 86   | 68.6               | 20.4               | -1.4     | 9.1   | .049            |             |
|          |          | DLX20BID | 81   | 69.7               | 19.5               | 3.9      | 12.8  | (.585)          | .013        |
|          |          | DLX40BID | 81   | 70.1               | 18.2               | 2.4      | 9.2   |                 | .019        |
|          |          | PRX20QD  | 78   | 72.5               | 23.4               | 0.9      | 14.0  |                 | .153        |
| CALC     | mmol/L   | PLACEBO  | 86   | 2.397              | 0.111              | -0.035   | 0.126 | .009            |             |
|          |          | DLX20BID | 81   | 2.379              | 0.112              | -0.006   | 0.148 | (.280)          | .273        |
|          |          | DLX40BID | 81   | 2.398              | 0.120              | -0.003   | 0.144 |                 | .193        |
|          |          | PRX20QD  | 78   | 2.357              | 0.102              | 0.032    | 0.110 |                 | <.001       |
| SODIUM   | mmol/L   | PLACEBO  | 86   | 141.7              | 2.1                | -1.2     | 2.8   | .020            |             |
|          |          | DLX20BID | 81   | 141.5              | 2.2                | -0.4     | 2.9   | (.554)          | .079        |
|          |          | DLX40BID | 81   | 141.5              | 2.7                | -0.2     | 3.3   |                 | .014        |
|          |          | PRX20QD  | 78   | 141.2              | 2.4                | 0.2      | 3.0   |                 | .004        |
| UR AC    | umol/L   | PLACEBO  | 86   | 288.8              | 87.8               | 1.0      | 43.6  | .145            |             |
|          |          | DLX20BID | 81   | 314.4              | 82.8               | -1.0     | 48.8  | (.810)          | .262        |
|          |          | DLX40BID | 81   | 304.9              | 84.1               | -17.1    | 47.8  |                 | .022        |
|          |          | PRX20QD  | 78   | 300.8              | 81.5               | -5.5     | 48.3  |                 | .150        |
| T.BILI   | umol/L   | PLACEBO  | 86   | 6.8                | 6.0                | 0.9      | 2.9   | .016            |             |
|          |          | DLX20BID | 81   | 6.7                | 4.2                | -0.0     | 3.6   | (.808)          | .017        |
|          |          | DLX40BID | 81   | 7.1                | 5.6                | -0.5     | 3.4   |                 | .008        |
|          |          | PRX20QD  | 78   | 6.2                | 3.7                | 0.6      | 2.9   |                 | .591        |

Output stored as RMP.FIJO.HMAT.FINALB(LS604002)

Data from RMP.SAS.FIJM.MCHMATSW.STUDYB

Note: n = Total number of patients in each treatment group having the variable in both baseline and postbaseline visits.

Note: Models:

RDUC1 - \*1 Type III Sums of Squares from an analysis of variance (ANOVA) on the ranks:  
PROC GLM model=investigator and treatment for the overall p-Value and  
model=investigator, treatment, and interaction for the interaction p-Value.

\*2 Least-squares mean option in PROC GLM from the ANOVA on the ranks using the  
mean square for error.

Note: Each investigator has at least one patient in each treatment group.

**Table HMA**T**b.5.      Laboratory Data - Chemistry Analytes  
 Analytes with Statistically Significant Mean Change From  
 Baseline to Endpoint Values  
 All Randomized Patients  
 Acute Therapy Phase**

Legend of Lab Test Code Abbreviations:

| Abbrev. | Description            |
|---------|------------------------|
| AST     | AST/SGOT               |
| ALT     | ALT/SGPT               |
| CPK     | CREATINE PHOSPHOKINASE |
| ALKPH   | ALKALINE PHOSPHATASE   |
| CALC    | CALCIUM                |
| SODIUM  | SODIUM                 |
| UR AC   | URIC ACID              |
| T.BILI  | BILIRUBIN, TOTAL       |

**Table HMA**T**b.6. Laboratory Data - Nonchemistry Analytes  
Analytes with Statistically Significant Mean Change From  
Baseline to Endpoint Values  
All Randomized Patients  
Acute Therapy Phase**

| Lab Test | Lab Unit | Therapy  | n  | Change to |        |         |        | Therapy (Int*1) | Pair-wise*2 | Model |
|----------|----------|----------|----|-----------|--------|---------|--------|-----------------|-------------|-------|
|          |          |          |    | Mean      | SD     | Mean    | SD     |                 |             |       |
| HCT      | l        | PLACEBO  | 79 | 0.4189    | 0.0394 | -0.0090 | 0.0278 | .067            |             | RDUC1 |
|          |          | DLX20BID | 76 | 0.4237    | 0.0364 | 0.0011  | 0.0240 | (.613)          | .019        |       |
|          |          | DLX40BID | 76 | 0.4233    | 0.0350 | -0.0007 | 0.0259 |                 | .067        |       |
|          |          | PRX20QD  | 67 | 0.4201    | 0.0398 | -0.0057 | 0.0263 |                 | .634        |       |
| MCHC     | mml/L-Fe | PLACEBO  | 79 | 21.0      | 1.1    | 0.1     | 1.1    | .225            |             | RDUC1 |
|          |          | DLX20BID | 76 | 21.0      | 0.8    | -0.2    | 1.0    | (.736)          | .047        |       |
|          |          | DLX40BID | 76 | 21.0      | 1.0    | 0.0     | 1.1    |                 | .583        |       |
|          |          | PRX20QD  | 67 | 21.0      | 1.0    | 0.0     | 1.2    |                 | .628        |       |
| WBC      | GI/L     | PLACEBO  | 80 | 7.43      | 1.76   | -0.31   | 1.21   | .043            |             | RDUC1 |
|          |          | DLX20BID | 76 | 7.24      | 1.83   | 0.18    | 1.76   | (.053)          | .085        |       |
|          |          | DLX40BID | 77 | 7.85      | 2.23   | -0.44   | 1.64   |                 | .359        |       |
|          |          | PRX20QD  | 69 | 7.60      | 1.99   | 0.08    | 1.92   |                 | .245        |       |
| BANDS    | GI/L     | PLACEBO  | 80 | 0.000     | 0.000  | 0.000   | 0.000  | *               |             | FULL3 |
|          |          | DLX20BID | 76 | 0.000     | 0.000  | 0.000   | 0.000  | (*)             | *           |       |
|          |          | DLX40BID | 77 | 0.000     | 0.000  | 0.000   | 0.000  |                 | *           |       |
|          |          | PRX20QD  | 69 | 0.000     | 0.000  | 0.000   | 0.000  |                 | *           |       |
| POLYS    | GI/L     | PLACEBO  | 80 | 4.565     | 1.391  | -0.284  | 1.084  | .074            |             | RDUC1 |
|          |          | DLX20BID | 76 | 4.514     | 1.411  | 0.140   | 1.604  | (.345)          | .143        |       |
|          |          | DLX40BID | 77 | 4.942     | 1.731  | -0.340  | 1.498  |                 | .511        |       |
|          |          | PRX20QD  | 69 | 4.709     | 1.590  | 0.144   | 1.679  |                 | .126        |       |
| BASO     | GI/L     | PLACEBO  | 80 | 0.046     | 0.027  | 0.004   | 0.037  | .034            |             | RDUC1 |
|          |          | DLX20BID | 76 | 0.049     | 0.027  | 0.003   | 0.025  | (.420)          | .400        |       |
|          |          | DLX40BID | 77 | 0.051     | 0.029  | 0.007   | 0.028  |                 | .178        |       |
|          |          | PRX20QD  | 69 | 0.055     | 0.031  | -0.005  | 0.045  |                 | .140        |       |
| MCV      | fL       | PLACEBO  | 79 | 89.0      | 5.4    | -0.9    | 4.1    | .055            |             | RDUC1 |
|          |          | DLX20BID | 76 | 89.6      | 5.1    | 0.9     | 3.8    | (.879)          | .006        |       |
|          |          | DLX40BID | 76 | 89.3      | 4.9    | 0.1     | 3.9    |                 | .226        |       |
|          |          | PRX20QD  | 67 | 89.7      | 4.5    | 0.0     | 4.7    |                 | .157        |       |
| U-SPGR   | NO UNITS | PLACEBO  | 54 | 1.0194    | 0.0082 | -0.0007 | 0.0080 | .013            |             | RDUC2 |
|          |          | DLX20BID | 52 | 1.0175    | 0.0075 | 0.0012  | 0.0087 | (.335)          | .212        |       |
|          |          | DLX40BID | 51 | 1.0177    | 0.0073 | 0.0039  | 0.0071 |                 | .001        |       |
|          |          | PRX20QD  | 47 | 1.0197    | 0.0077 | 0.0021  | 0.0088 |                 | .060        |       |
| TSH      | mU/L     | PRX20QD  | 2  | 0.835     | 0.021  | 0.165   | 0.148  |                 |             |       |
| CK-MB    | ng/ml    | PLACEBO  | 1  | 17.30     |        | -4.20   |        |                 |             |       |
| CKMBRI   | ngL/Uml  | PLACEBO  | 1  | 0.30      |        | 0.20    |        |                 |             |       |

**Table HMA**T**b.6.            Laboratory Data - Nonchemistry Analytes  
 Analytes with Statistically Significant Mean Change From  
 Baseline to Endpoint Values  
 All Randomized Patients  
 Acute Therapy Phase (concluded)**

Note: n = Total number of patients in each treatment group having the variable in both baseline and postbaseline visits.

Note: Models:

FULL3 - \*1 Type III Sums of Squares from an analysis of variance (ANOVA) on the ranks: PROC GLM model=inv., treatment, and interaction.

\*2 Least-squares mean option in PROC GLM from the ANOVA on the ranks using the mean square for error.

Note: Each investigator has at least one patient in each treatment group.

RDUC1 - \*1 Type III Sums of Squares from an analysis of variance (ANOVA) on the ranks: PROC GLM model=investigator and treatment for the overall p-Value and model=investigator, treatment, and interaction for the interaction p-Value.

\*2 Least-squares mean option in PROC GLM from the ANOVA on the ranks using the mean square for error.

Note: Each investigator has at least one patient in each treatment group.

RDUC2 - \*1 Type III Sums of Squares from an analysis of variance (ANOVA) on the ranks: PROC GLM model=investigator and treatment for the overall p-Value and model=investigator, treatment, and interaction for the interaction p-Value.

\*2 Least-squares mean option in PROC GLM from the ANOVA on the ranks using the mean square for error.

Note: At least one investigator does not have patients in every treatment group.

\*Note: Error sum of squares is equal to 0, thus no p-Values are computed.

Legend of Lab Test Code Abbreviations:

| Abbrev. | Description                               |
|---------|-------------------------------------------|
| HCT     | HEMATOCRIT                                |
| MCHC    | MEAN CELL HEMOGLOBIN CONCENTRATION (MCHC) |
| WBC     | LEUKOCYTE COUNT                           |
| BANDS   | BANDS                                     |
| POLYS   | NEUTROPHILS, SEGMENTED                    |
| BASO    | BASOPHILS                                 |
| MCV     | MEAN CELL VOLUME (MCV)                    |
| U-SPGR  | UA-SPECIFIC GRAVITY                       |
| TSH     | THYROID STIM. HORMONE                     |
| CK-MB   | CK-MB (IMX)                               |
| CKMBRI  | CK-MB RELATIVE INDEX                      |

Duloxetine Hydrochloride  
Copyright © 2004 Eli Lilly and Company. All rights reserved.

Approved by Lilly 16 November 2004

**Table HMA7b.7. Summary of Vital Signs and Weight Change from Baseline to Endpoint All Randomized Patients Acute Therapy Phase**

| Variable                        | Treatment Group |                |                |                |
|---------------------------------|-----------------|----------------|----------------|----------------|
|                                 | Placebo         | Dulox 20       | Dulox 40       | Paroxetine     |
| Heart rate (bpm)                | n=86            | n=84           | n=87           | n=85           |
| Mean baseline (SD)              | 73.50 (8.40)    | 71.75 (11.04)  | 71.02 (8.10)   | 71.20 (9.75)   |
| Mean change (SD)                | -1.66 (8.47)    | 0.75 (10.02)   | 2.02 (9.86)    | -0.21 (10.03)  |
| p-value (active vs placebo)     |                 | .172           | .044           | .524           |
| Systolic blood pressure (mmHg)  | n=86            | n=84           | n=87           | n=85           |
| Mean baseline (SD)              | 119.57 (12.95)  | 117.30 (11.12) | 120.62 (13.05) | 119.76 (15.36) |
| Mean change (SD)                | -3.24 (12.50)   | 0.13 (11.85)   | -0.18 (12.51)  | 0.42 (12.53)   |
| p-value (active vs placebo)     |                 | .176           | .098           | .052           |
| Diastolic blood pressure (mmHg) | n=86            | n=84           | n=87           | n=85           |
| Mean baseline (SD)              | 75.60 (9.57)    | 75.49 (8.87)   | 77.94 (9.43)   | 77.18 (10.17)  |
| Mean change (SD)                | -0.47 (8.61)    | 2.11 (9.04)    | 0.20 (7.33)    | 0.34 (9.97)    |
| p-value (active vs placebo)     |                 | .045           | .563           | .527           |
| Weight (kg)                     | n=87            | n=84           | n=86           | n=85           |
| Mean baseline (SD)              | 80.61 (18.87)   | 82.08 (20.31)  | 83.16 (20.95)  | 89.77 (79.45)  |
| Mean change (SD)                | 0.47 (1.95)     | -0.02 (2.08)   | -0.60 (2.20)   | -0.41 (2.63)   |
| p-value (active vs placebo)     |                 | .149           | .002           | .010           |

Abbreviations: Dulox 20 BID = duloxetine 20 mg twice daily; Dulox 40 BID = duloxetine 40 mg twice daily; n = number of patients; Parox 20 QD = paroxetine 20 mg once daily; SD = standard deviation.

Duloxetine Hydrochloride  
 Copyright © 2004 Eli Lilly and Company. All rights reserved.

Approved by Lilly 16 November 2004

**Table HMA**T**.8. Treatment-Emergent Abnormal Electrocardiograms  
 All Randomized Patients  
 Acute Therapy Phase**

| Therapy     | N  | Abnormal<br>ECG<br>n (%) | Fisher's Exact Pairwise p-Values |        |        |
|-------------|----|--------------------------|----------------------------------|--------|--------|
|             |    |                          | vs. 1)                           | vs. 2) | vs. 3) |
| 1) PLACEBO  | 56 | 10 (18%)                 |                                  |        |        |
| 2) DLX20BID | 48 | 11 (23%)                 | .626                             |        |        |
| 3) DLX40BID | 52 | 10 (19%)                 | 1.00                             | .807   |        |
| 4) PRX20QD  | 48 | 10 (21%)                 | .804                             | 1.00   | 1.00   |

Fisher's Exact p-value overall = 0.9436

Program: RMP.F1JSHMAT.SASPGM.STUDYB(FQECGB1B) QCA70

Data: RMP.SAS.F1JM.MCHMATSW.STUDYB

For peer review only

1  
2  
3  
4  
5  
6  
7  
8  
9  
10  
11  
12  
13  
14  
15  
16  
17  
18  
19  
20  
21  
22  
23  
24  
25  
26  
27  
28  
29  
30  
31  
32  
33  
34  
35  
36  
37  
38  
39  
40  
41  
42  
43  
44  
45  
46  
47  
48  
49

Duloxetine Hydrochloride  
Copyright © 2004 Eli Lilly and Company. All rights reserved.

Approved by Lilly 16 November 2004

**Table HMA**T**b.9. Summary of Arizona Sexual Experiences Scale  
Change from Baseline to Endpoint  
All Randomized Patients  
Acute Therapy Phase**

| Variable                             | Treatment Group |              |              |              |
|--------------------------------------|-----------------|--------------|--------------|--------------|
|                                      | Placebo         | Dulox 20     | Dulox 40     | Paroxetine   |
| ASEX Total Score                     | n=49            | n=50         | n=45         | n=48         |
| Mean baseline (SD)                   | 16.20 (5.06)    | 15.90 (4.10) | 16.36 (3.90) | 15.96 (4.74) |
| Mean change (SD)                     | 0.02 (3.94)     | 0.50 (3.88)  | 0.62 (4.80)  | 0.56 (5.13)  |
| LS Means p-value (active vs placebo) |                 | 0.496        | 0.553        | .728         |
| ASEX sum of items 1 and 2            | n=85            | n=80         | n=83         | n=72         |
| Mean baseline (SD)                   | 7.53 (2.78)     | 7.55 (2.45)  | 7.58 (2.02)  | 7.60 (2.58)  |
| Mean change (SD)                     | 0.13 (2.06)     | -0.24 (2.19) | 0.02 (2.07)  | -0.10 (2.29) |
| LS means p-value (active vs placebo) |                 | .277         | .850         | .667         |

Abbreviations: ASE**X** = Arizona Sexual Experiences Scale; Dulox 20 BID = duloxetine 20 mg twice daily; Dulox 40 BID = duloxetine 40 mg twice daily; n = number of patients; Parox 20 QD = paroxetine 20 mg once daily; SD = standard deviation.



## STROBE Statement

“Differences in Reporting Serious Adverse Events in Industry-Sponsored Clinical Trial Registries and Journal Articles on Antidepressant and Antipsychotic Drugs – A Cross-sectional Study”

|                              | Page No | Recommendation                                                                                                                                                                                                                                                                                            |
|------------------------------|---------|-----------------------------------------------------------------------------------------------------------------------------------------------------------------------------------------------------------------------------------------------------------------------------------------------------------|
| <b>Title and abstract</b>    | 1       | (a) Indicate the study’s design with a commonly used term in the title or the abstract                                                                                                                                                                                                                    |
|                              | 2       | (b) Provide in the abstract an informative and balanced summary of what was done and what was found                                                                                                                                                                                                       |
| <b>Introduction</b>          |         |                                                                                                                                                                                                                                                                                                           |
| Background/rationale         | 4-5     | Explain the scientific background and rationale for the investigation being reported                                                                                                                                                                                                                      |
| Objectives                   | 4-5     | State specific objectives, including any prespecified hypotheses                                                                                                                                                                                                                                          |
| <b>Methods</b>               |         |                                                                                                                                                                                                                                                                                                           |
| Study design                 | 6-8     | Present key elements of study design early in the paper                                                                                                                                                                                                                                                   |
| Setting                      | 6-7     | Describe the setting, locations, and relevant dates, including periods of recruitment, exposure, follow-up, and data collection                                                                                                                                                                           |
| Participants                 | 6-7     | <i>Cross-sectional study</i> —Give the eligibility criteria, and the sources and methods of selection of participants                                                                                                                                                                                     |
| Variables                    | 8-9     | Clearly define all outcomes, exposures, predictors, potential confounders, and effect modifiers. Give diagnostic criteria, if applicable                                                                                                                                                                  |
| Data sources/<br>measurement | 6-9     | For each variable of interest, give sources of data and details of methods of assessment (measurement). Describe comparability of assessment methods if there is more than one group                                                                                                                      |
| Bias                         | 8       | Describe any efforts to address potential sources of bias                                                                                                                                                                                                                                                 |
| Study size                   | 6-7     | Explain how the study size was arrived at                                                                                                                                                                                                                                                                 |
| Quantitative variables       | 8-9     | Explain how quantitative variables were handled in the analyses. If applicable, describe which groupings were chosen and why                                                                                                                                                                              |
| Statistical methods          | 9-10    | (a) Describe all statistical methods, including those used to control for confounding                                                                                                                                                                                                                     |
|                              | n/a     | (b) Describe any methods used to examine subgroups and interactions                                                                                                                                                                                                                                       |
|                              | n/a     | (c) Explain how missing data were addressed                                                                                                                                                                                                                                                               |
|                              | n/a     | (d) <i>Cohort study</i> —If applicable, explain how loss to follow-up was addressed<br><i>Case-control study</i> —If applicable, explain how matching of cases and controls was addressed<br><i>Cross-sectional study</i> —If applicable, describe analytical methods taking account of sampling strategy |
|                              | n/a     | (e) Describe any sensitivity analyses                                                                                                                                                                                                                                                                     |

1  
2  
3  
4  
5  
6  
7  
8  
9  
10  
11  
12  
13  
14  
15  
16  
17  
18  
19  
20  
21  
22  
23  
24  
25  
26  
27  
28  
29  
30  
31  
32  
33  
34  
35  
36  
37  
38  
39  
40  
41  
42  
43  
44  
45  
46  
47  
48  
49  
50  
51  
52  
53  
54  
55  
56  
57  
58  
59  
60

| <b>Results</b>           |           |                                                                                                                                                                                                   |
|--------------------------|-----------|---------------------------------------------------------------------------------------------------------------------------------------------------------------------------------------------------|
| Participants             | 10, 24    | (a) Report numbers of individuals at each stage of study—eg numbers potentially eligible, examined for eligibility, confirmed eligible, included in the study, completing follow-up, and analysed |
|                          | 10, 24    | (b) Give reasons for non-participation at each stage                                                                                                                                              |
|                          |           | (c) Consider use of a flow diagram                                                                                                                                                                |
| Descriptive data         | 10-11, 25 | (a) Give characteristics of study participants (eg demographic, clinical, social) and information on exposures and potential confounders                                                          |
|                          | n/a       | (b) Indicate number of participants with missing data for each variable of interest                                                                                                               |
| Outcome data             | 11-13     | <i>Cross-sectional study</i> —Report numbers of outcome events or summary measures                                                                                                                |
| Main results             | 11-13     | (a) Give unadjusted estimates and, if applicable, confounder-adjusted estimates and their precision (eg, 95% confidence interval).                                                                |
|                          | n/a       | (b) Report category boundaries when continuous variables were categorized                                                                                                                         |
|                          |           | (c) If relevant, consider translating estimates of relative risk into absolute risk for a meaningful time period                                                                                  |
| Other analyses           | 14        | Report other analyses done—eg analyses of subgroups and interactions, and sensitivity analyses                                                                                                    |
| <b>Discussion</b>        |           |                                                                                                                                                                                                   |
| Key results              | 15-17     | Summarise key results with reference to study objectives                                                                                                                                          |
| Limitations              | 18        | Discuss limitations of the study, taking into account sources of potential bias or imprecision. Discuss both direction and magnitude of any potential bias                                        |
| Interpretation           | 15-19     | Give a cautious overall interpretation of results considering objectives, limitations, multiplicity of analyses, results from similar studies, and other relevant evidence                        |
| Generalisability         | 18        | Discuss the generalisability (external validity) of the study results                                                                                                                             |
| <b>Other information</b> |           |                                                                                                                                                                                                   |
| Funding                  | 20        | Give the source of funding and the role of the funders for the present study and, if applicable, for the original study on which the present article is based                                     |
